# Supplementary material for: Ru(0)-catalysed cross-dimerisation and -trimerisation of alkynyl- with butadienylheteroarenes
Source: Royal Society of Chemistry journal article supplement (doi:10.1039/d3ob00207a), 2023-01-01
Supplement: d3ob00207a1.pdf [file d3ob00207a1.pdf]

## **Electronic supplementary information:**

# **Ru(0)-catalysed cross-dimerisation and -trimerisation of alkynyl- with butadienylheteroarenes**

Sayori Kiyota, Kohei Kamakura, Nobuyuki Komine and Masafumi Hirano\*

Department of Applied Chemistry, Graduate School of Engineering, Tokyo University of Agriculture and  
Technology, 2-24-16 Nakacho, Koganei, Tokyo 184-8588, Japan.

Emails: sayo@cc.tuat.ac.jp (SK); hrc@cc.tuat.ac.jp (MH)

## ■ Table of Contents

---

|                                                                                                                                       |      |
|---------------------------------------------------------------------------------------------------------------------------------------|------|
| Figure S1. $^1\text{H}$ NMR Spectrum of (1 <i>E</i> ,3 <i>E</i> ,5 <i>E</i> )-4aa in $\text{C}_6\text{D}_6$                           | S-5  |
| Figure S2. $^{13}\text{C}\{^1\text{H}\}$ NMR Spectrum of (1 <i>E</i> ,3 <i>E</i> ,5 <i>E</i> )-4aa in $\text{C}_6\text{D}_6$          | S-5  |
| Figure S3. $^1\text{H}$ - $^1\text{H}$ COSY NMR Spectrum of (1 <i>E</i> ,3 <i>E</i> ,5 <i>E</i> )-4aa in $\text{C}_6\text{D}_6$       | S-6  |
| Figure S4. $^1\text{H}$ - $^1\text{H}$ NOESY NMR Spectrum of (1 <i>E</i> ,3 <i>E</i> ,5 <i>E</i> )-4aa in $\text{C}_6\text{D}_6$      | S-6  |
| Figure S5. $^{13}\text{C}$ - $^1\text{H}$ Correlation Spectrum of (1 <i>E</i> ,3 <i>E</i> ,5 <i>E</i> )-4aa in $\text{C}_6\text{D}_6$ | S-7  |
| Figure S6. HRMS (APCI) data for (1 <i>E</i> ,3 <i>E</i> ,5 <i>E</i> )-4aa                                                             | S-7  |
| Figure S7. $^1\text{H}$ NMR Spectrum of (1 <i>E</i> ,3 <i>E</i> ,5 <i>E</i> )-4ab in $\text{C}_6\text{D}_6$                           | S-8  |
| Figure S8. $^{13}\text{C}\{^1\text{H}\}$ NMR Spectrum of (1 <i>E</i> ,3 <i>E</i> ,5 <i>E</i> )-4ab in $\text{C}_6\text{D}_6$          | S-8  |
| Figure S9. $^1\text{H}$ - $^1\text{H}$ COSY NMR Spectrum of (1 <i>E</i> ,3 <i>E</i> ,5 <i>E</i> )-4ab in $\text{C}_6\text{D}_6$       | S-9  |
| Figure S10. $^1\text{H}$ - $^1\text{H}$ NOESY NMR Spectrum of (1 <i>E</i> ,3 <i>E</i> ,5 <i>E</i> )-4ab in $\text{C}_6\text{D}_6$     | S-9  |
| Figure S11. HRMS (APCI) data for (1 <i>E</i> ,3 <i>E</i> ,5 <i>E</i> )-4ab                                                            | S-10 |
| Figure S12. $^1\text{H}$ NMR Spectrum of 4ca in $\text{CDCl}_3$                                                                       | S-10 |
| Figure S13. $^{13}\text{C}\{^1\text{H}\}$ NMR Spectrum of 4ca in $\text{CDCl}_3$                                                      | S-11 |
| Figure S14. $^1\text{H}$ - $^1\text{H}$ NOESY NMR Spectrum of 4ca a in $\text{CDCl}_3$                                                | S-11 |
| Figure S15. HRMS (APCI) data for 4ca                                                                                                  | S-12 |
| Figure S16. $^1\text{H}$ NMR Spectrum of 4ac in $\text{C}_6\text{D}_6$                                                                | S-13 |
| Figure S17. $^{13}\text{C}\{^1\text{H}\}$ NMR Spectrum of 4ac in $\text{C}_6\text{D}_6$                                               | S-13 |
| Figure S18. $^1\text{H}$ - $^1\text{H}$ COSY NMR Spectrum of 4ac in $\text{C}_6\text{D}_6$                                            | S-14 |
| Figure S19. $^1\text{H}$ - $^1\text{H}$ NOESY NMR Spectrum of 4ac in $\text{C}_6\text{D}_6$                                           | S-14 |
| Figure S20. $^{13}\text{C}$ - $^1\text{H}$ Correlation Spectrum of 4ac in $\text{C}_6\text{D}_6$                                      | S-15 |
| Figure S21. HRMS (APCI) data for 4ac                                                                                                  | S-15 |
| Figure S22. $^1\text{H}$ NMR Spectrum of 4ad in $\text{C}_6\text{D}_6$                                                                | S-16 |
| Figure S23. $^{13}\text{C}\{^1\text{H}\}$ NMR Spectrum of 4ad in $\text{C}_6\text{D}_6$                                               | S-16 |
| Figure S24. $^1\text{H}$ - $^1\text{H}$ COSY NMR Spectrum of 4ad in $\text{C}_6\text{D}_6$                                            | S-17 |
| Figure S25. $^1\text{H}$ - $^1\text{H}$ NOESY NMR Spectrum of 4ad in $\text{C}_6\text{D}_6$                                           | S-17 |
| Figure S26. HRMS (APCI) data for 4ad                                                                                                  | S-18 |
| Figure S27. $^1\text{H}$ NMR Spectrum of 4cc in $\text{C}_6\text{D}_6$                                                                | S-18 |
| Figure S28. $^{13}\text{C}\{^1\text{H}\}$ NMR Spectrum of 4cc in $\text{C}_6\text{D}_6$                                               | S-19 |
| Figure S29. $^1\text{H}$ - $^1\text{H}$ COSY NMR Spectrum of 4cc in $\text{C}_6\text{D}_6$                                            | S-19 |
| Figure S30. $^1\text{H}$ - $^1\text{H}$ NOESY NMR Spectrum of 4cc in $\text{C}_6\text{D}_6$                                           | S-20 |
| Figure S31. $^{13}\text{C}$ - $^1\text{H}$ Correlation Spectrum of 4cc in $\text{C}_6\text{D}_6$                                      | S-20 |
| Figure S32. HRMS (APCI) data for 4cc in $\text{C}_6\text{D}_6$                                                                        | S-21 |

|                                                                                                                                      |      |
|--------------------------------------------------------------------------------------------------------------------------------------|------|
| Figure S33. $^1\text{H}$ NMR Spectrum of 4dc in $\text{C}_6\text{D}_6$                                                               | S-21 |
| Figure S34. $^{13}\text{C}\{^1\text{H}\}$ NMR Spectrum of 4dc in $\text{C}_6\text{D}_6$                                              | S-22 |
| Figure S35. $^1\text{H}$ - $^1\text{H}$ COSY NMR Spectrum of 4dc in $\text{C}_6\text{D}_6$                                           | S-22 |
| Figure S36. $^1\text{H}$ - $^1\text{H}$ NOESY NMR Spectrum of 4dc in $\text{C}_6\text{D}_6$                                          | S-23 |
| Figure S37. $^{13}\text{C}$ - $^1\text{H}$ Correlation Spectrum of 4dc in $\text{C}_6\text{D}_6$                                     | S-23 |
| Figure S38. HRMS (APCI) data for 4dc                                                                                                 | S-24 |
| Figure S39. $^1\text{H}$ NMR Spectrum of 4dd and 5dd in $\text{C}_6\text{D}_6$                                                       | S-24 |
| Figure S40. $^{13}\text{C}\{^1\text{H}\}$ NMR Spectrum of 4dd and 5dd in $\text{C}_6\text{D}_6$                                      | S-25 |
| Figure S41. HRMS (APCI) data for 4dd and 5dd                                                                                         | S-25 |
| Figure S42. $^1\text{H}$ NMR Spectrum of 4ee in $\text{CDCl}_3$                                                                      | S-26 |
| Figure S43. $^{13}\text{C}\{^1\text{H}\}$ NMR Spectrum of 4ee in $\text{CDCl}_3$                                                     | S-26 |
| Figure S44. $^1\text{H}$ - $^1\text{H}$ COSY NMR Spectrum of 4ee in $\text{CDCl}_3$                                                  | S-27 |
| Figure S45. $^1\text{H}$ - $^1\text{H}$ NOESY NMR Spectrum of 4ee in $\text{CDCl}_3$                                                 | S-27 |
| Figure S46 HRMS (APCI) data for 4ee                                                                                                  | S-28 |
| Figure S47. $^1\text{H}$ NMR Spectrum of 4ef and 5ef in $\text{CDCl}_3$                                                              | S-28 |
| Figure S48. $^{13}\text{C}\{^1\text{H}\}$ NMR Spectrum of 4ef (included 5ef) in $\text{CDCl}_3$                                      | S-29 |
| Figure S49. $^1\text{H}$ - $^1\text{H}$ COSY NMR Spectrum of 4ef and 5ef in $\text{CDCl}_3$                                          | S-29 |
| Figure S50. $^1\text{H}$ - $^1\text{H}$ NOESY NMR Spectrum of 4ef and 5ef in $\text{CDCl}_3$                                         | S-30 |
| Figure S51. $^{13}\text{C}$ - $^1\text{H}$ Correlation Spectrum of 4ef (included 5ef) in $\text{CDCl}_3$                             | S-30 |
| Figure S52. HRMS (APCI) data for 4ef and 5ef                                                                                         | S-31 |
| Figure S53. $^1\text{H}$ NMR Spectrum of 4ga in $\text{C}_6\text{D}_6$                                                               | S-31 |
| Figure S54. $^{13}\text{C}\{^1\text{H}\}$ NMR Spectrum of 4ga in $\text{C}_6\text{D}_6$                                              | S-32 |
| Figure S55. $^1\text{H}$ - $^1\text{H}$ COSY NMR Spectrum of 4ga in $\text{C}_6\text{D}_6$                                           | S-32 |
| Figure S56. $^1\text{H}$ - $^1\text{H}$ NOESY NMR Spectrum of 4ga in $\text{C}_6\text{D}_6$                                          | S-33 |
| Figure S57. $^{13}\text{C}$ - $^1\text{H}$ Correlation Spectrum of 4ga in $\text{C}_6\text{D}_6$                                     | S-33 |
| Figure S58. HRMS (APCI) data for 4ga and 5ga                                                                                         | S-34 |
| Figure S59. $^1\text{H}$ NMR Spectrum of 8b and 8c in $\text{C}_6\text{D}_6$                                                         | S-34 |
| Figure S60. $^1\text{H}$ - $^1\text{H}$ COSY NMR Spectrum of 8b and 8c in $\text{C}_6\text{D}_6$                                     | S-35 |
| Figure S61. $^1\text{H}$ - $^1\text{H}$ NOESY NMR Spectrum of 8b and 8c in $\text{C}_6\text{D}_6$                                    | S-35 |
| Figure S62. $^1\text{H}$ NMR Spectrum of Stoichiometric Reaction (7 and 8b in $\text{C}_6\text{D}_6$ )                               | S-36 |
| Figure S63. $^1\text{H}$ - $^1\text{H}$ COSY NMR Spectrum of Stoichiometric Reaction (7 and 8b in $\text{C}_6\text{D}_6$ )           | S-36 |
| Figure S64. $^1\text{H}$ - $^1\text{H}$ NOESY NMR Spectrum of Stoichiometric Reaction (7 and 8b in $\text{C}_6\text{D}_6$ )          | S-37 |
| Figure S65. $^{13}\text{C}\{^1\text{H}\}$ NMR Spectrum of Stoichiometric Reaction (7, 8b and 8c in $\text{C}_6\text{D}_6$ )          | S-37 |
| Figure S66. $^{13}\text{C}$ - $^1\text{H}$ Correlation Spectrum of Stoichiometric Reaction (7, 8b and 8c in $\text{C}_6\text{D}_6$ ) | S-38 |
| Figure S67. $^1\text{H}$ NMR Spectrum of 8d in $\text{C}_6\text{D}_6$                                                                | S-38 |

|                                                                                                        |             |
|--------------------------------------------------------------------------------------------------------|-------------|
| <b>Figure S68.</b> $^{13}\text{C}\{^1\text{H}\}$ NMR Spectrum of 8d in $\text{C}_6\text{D}_6$          | <b>S-39</b> |
| <b>Figure S69.</b> $^1\text{H}$ - $^1\text{H}$ COSY NMR Spectrum of 8d in $\text{C}_6\text{D}_6$       | <b>S-39</b> |
| <b>Figure S70.</b> $^1\text{H}$ - $^1\text{H}$ NOESY NMR Spectrum of 8d in $\text{C}_6\text{D}_6$      | <b>S-40</b> |
| <b>Figure S71.</b> $^{13}\text{C}$ - $^1\text{H}$ Correlation Spectrum of 8d in $\text{C}_6\text{D}_6$ | <b>S-40</b> |
| <b>Figure S72.</b> Fluorescence emission (0.1 mM) spectra of compounds 4 in MeCN at r.t.               |             |
|                                                                                                        | <b>S-41</b> |
| <b>Figure S73.</b> Calculated UV-Vis spectrum of isomer A of 4ac in acetonitrile by TD-DFT             | <b>S-42</b> |
| <b>Figure S74.</b> Calculated UV-Vis spectrum of isomer B of 4ac in acetonitrile by TD-DFT             | <b>S-42</b> |
| <b>Figure S75.</b> Calculated UV-Vis spectrum of isomer C of 4ac in acetonitrile by TD-DFT             | <b>S-42</b> |
| <b>Figure S76.</b> Calculated UV-Vis spectrum of isomer A of 4cc in acetonitrile by TD-DFT             | <b>S-43</b> |
| <b>Figure S77.</b> Calculated UV-Vis spectrum of isomer B of 4cc in acetonitrile by TD-DFT             | <b>S-43</b> |
| <b>Figure S78.</b> Calculated UV-Vis spectrum of isomer C of 4cc in acetonitrile by TD-DFT             | <b>S-44</b> |
| <b>Figure S79.</b> Calculated UV-Vis spectrum of 4ee' in acetonitrile by TD-DFT                        | <b>S-44</b> |
| <b>Table S1.</b> TD-DFT results for 4ac (isomer A) in acetonitrile                                     | <b>S-45</b> |
| <b>Table S2.</b> TD-DFT results for 4ac (isomer B) in acetonitrile                                     | <b>S-49</b> |
| <b>Table S3.</b> TD-DFT results for 4ac (isomer C) in acetonitrile                                     | <b>S-54</b> |
| <b>Table S4.</b> TD-DFT results for 4cc (isomer A) in acetonitrile                                     | <b>S-58</b> |
| <b>Table S5.</b> TD-DFT results for 4cc (isomer B) in acetonitrile                                     | <b>S-62</b> |
| <b>Table S6.</b> TD-DFT results for 4cc (isomer C) in acetonitrile                                     | <b>S-66</b> |
| <b>Table S7.</b> TD-DFT results for 4ee in acetonitrile                                                | <b>S-71</b> |
| <b>Table S8.</b> Cartesian coordinates of isomer A of 4ac by TD-DFT calculations                       | <b>S-76</b> |
| <b>Table S9.</b> Cartesian coordinates of isomer B of 4ac by TD-DFT calculations                       | <b>S-79</b> |
| <b>Table S10.</b> Cartesian coordinates of isomer C of 4ac by TD-DFT calculations                      | <b>S-82</b> |
| <b>Table S11.</b> Cartesian coordinates of isomer A of 4cc by TD-DFT calculations                      | <b>S-85</b> |
| <b>Table S12.</b> Cartesian coordinates of isomer B of 4cc by TD-DFT calculations                      | <b>S-88</b> |
| <b>Table S13.</b> Cartesian coordinates of isomer C of 4cc by TD-DFT calculations                      | <b>S-91</b> |
| <b>Table S14.</b> Cartesian coordinates of 4ee by TD-DFT calculations                                  | <b>S-94</b> |

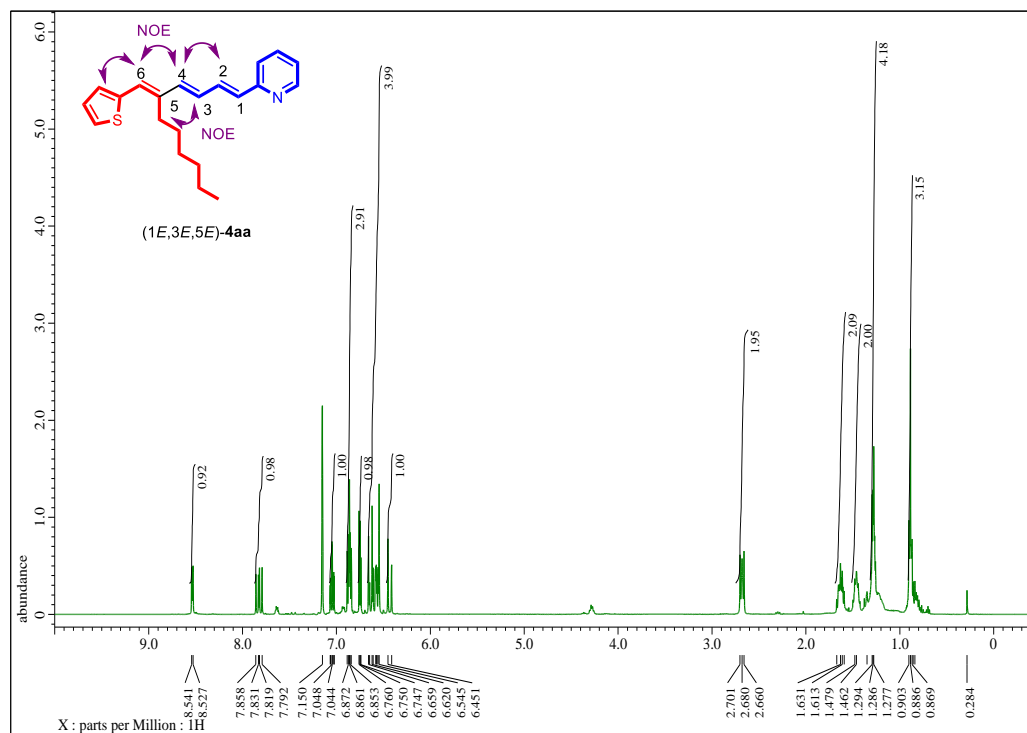

Figure S1.  $^1\text{H}$  NMR Spectrum of (1E,3E,5E)-4aa in  $\text{C}_6\text{D}_6$ .

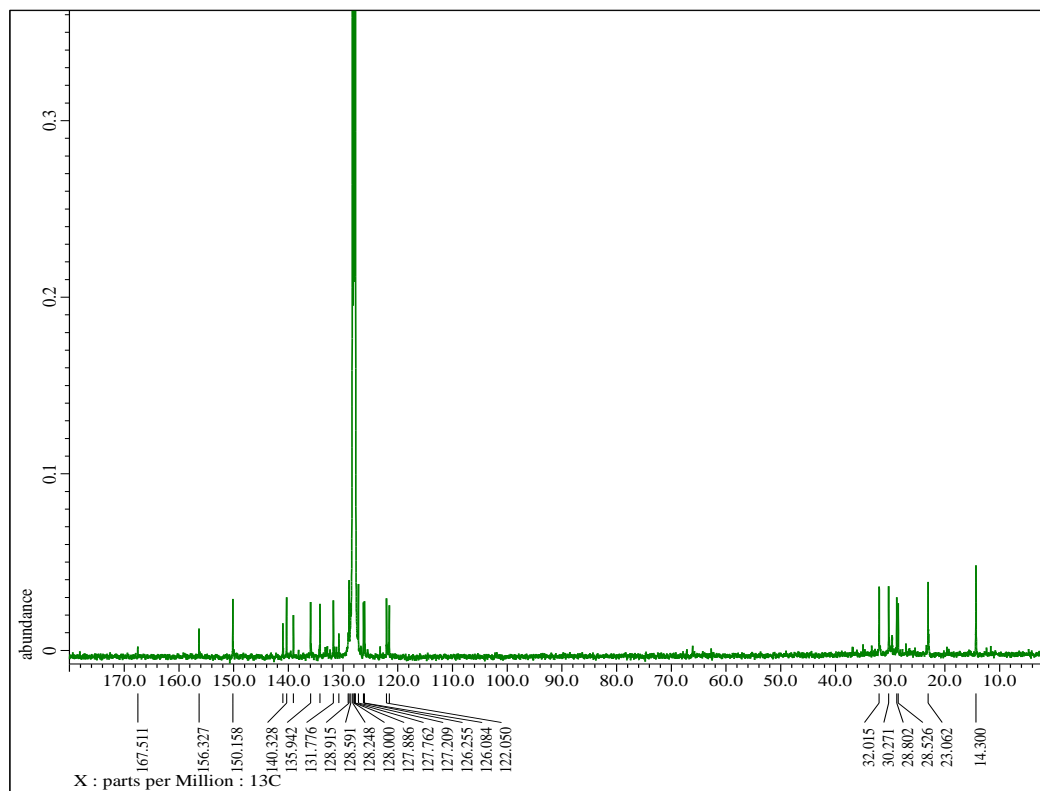

Figure S2.  $^{13}\text{C}\{^1\text{H}\}$  NMR Spectrum of (1E,3E,5E)-4aa in  $\text{C}_6\text{D}_6$ .

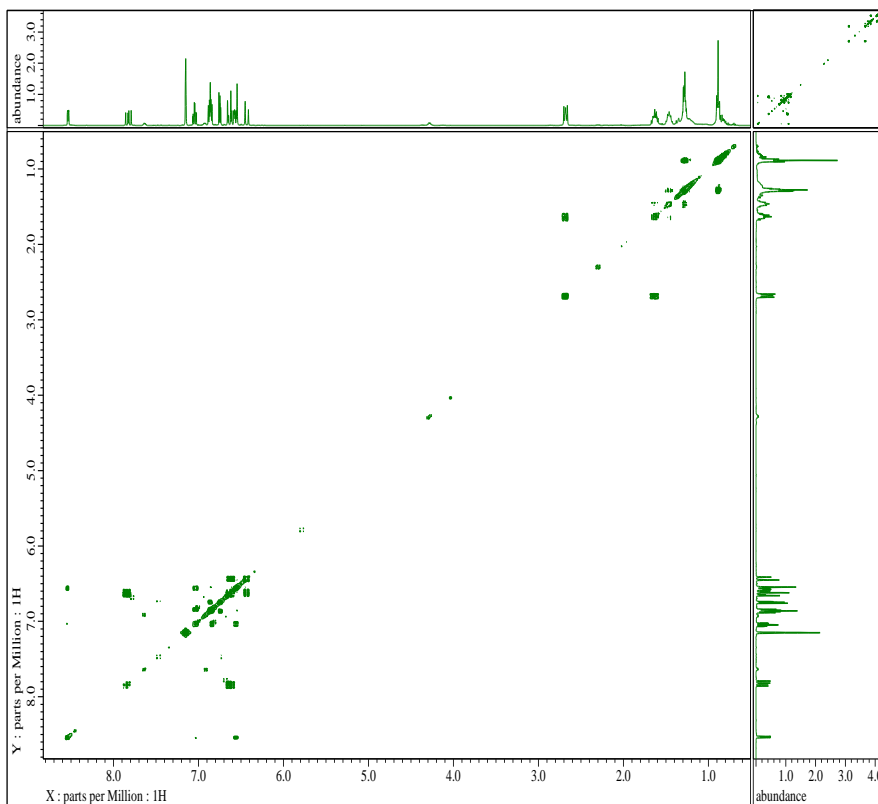

Figure S3.  $^1\text{H}$ - $^1\text{H}$  COSY NMR Spectrum of (1*E*,3*E*,5*E*)-4aa in  $\text{C}_6\text{D}_6$ .

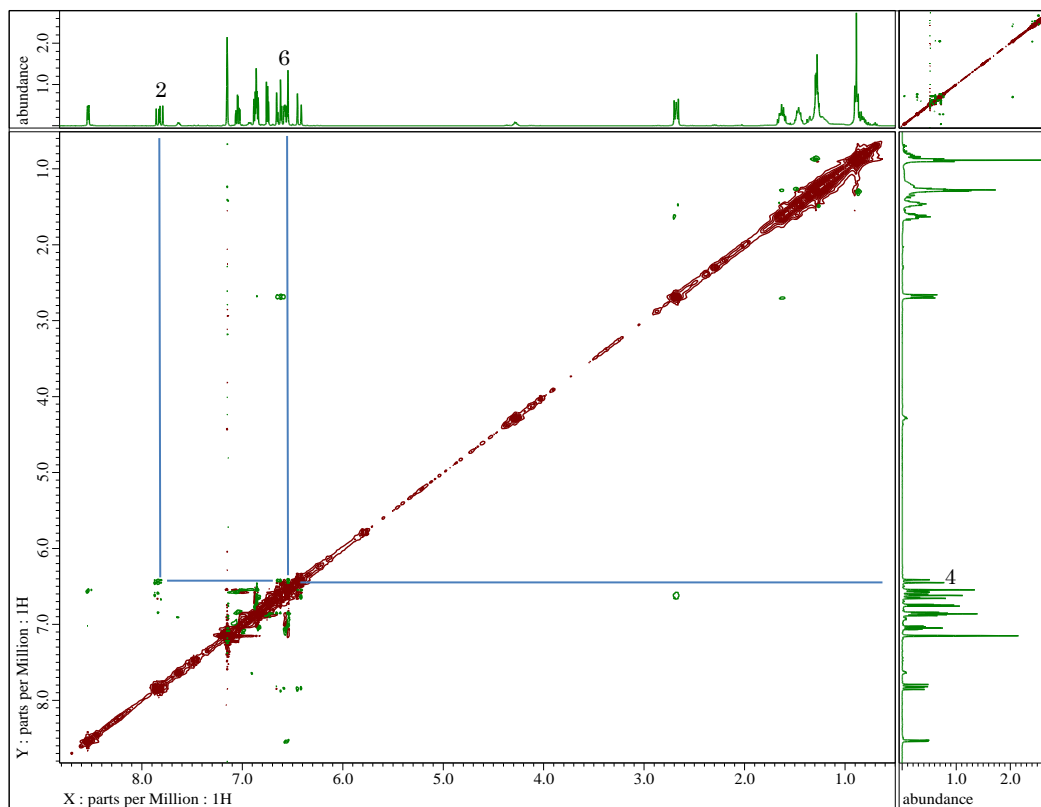

Figure S4.  $^1\text{H}$ - $^1\text{H}$  pNOESY NMR Spectrum of (1*E*,3*E*,5*E*)-4aa in  $\text{C}_6\text{D}_6$ .

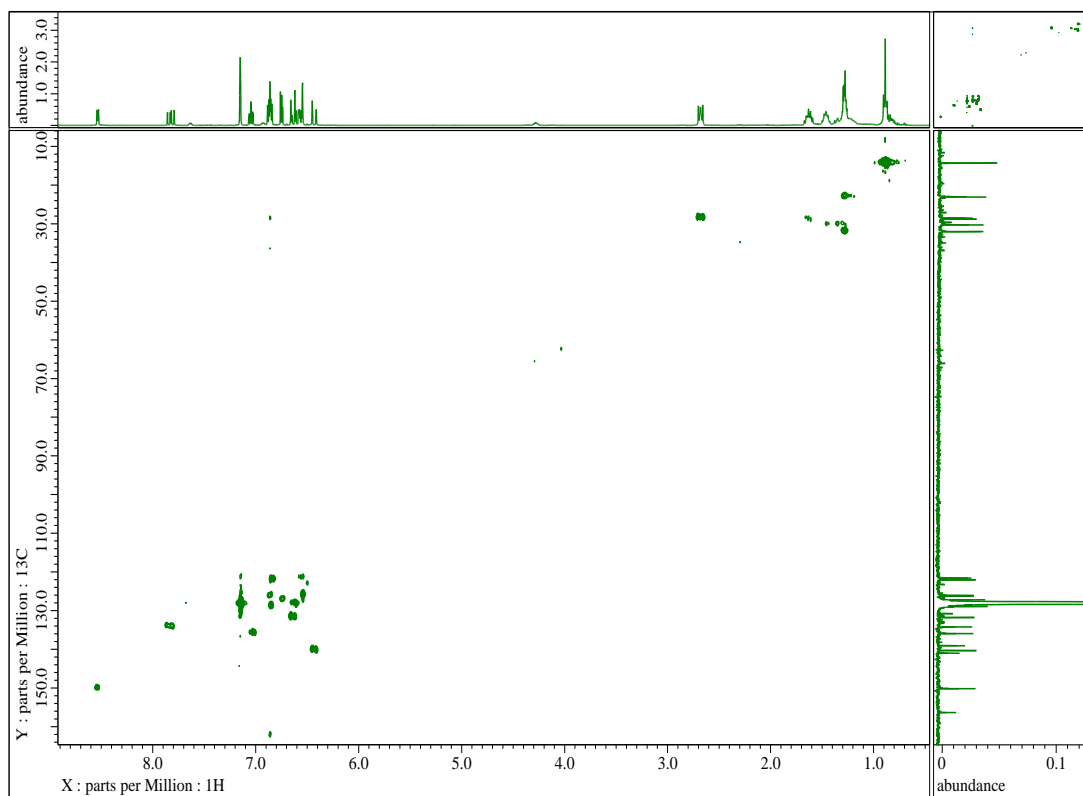

Figure S5.  $^{13}\text{C}$ - $^1\text{H}$  Correlation Spectrum of (1*E*,3*E*,5*E*)-4aa in  $\text{C}_6\text{D}_6$ .

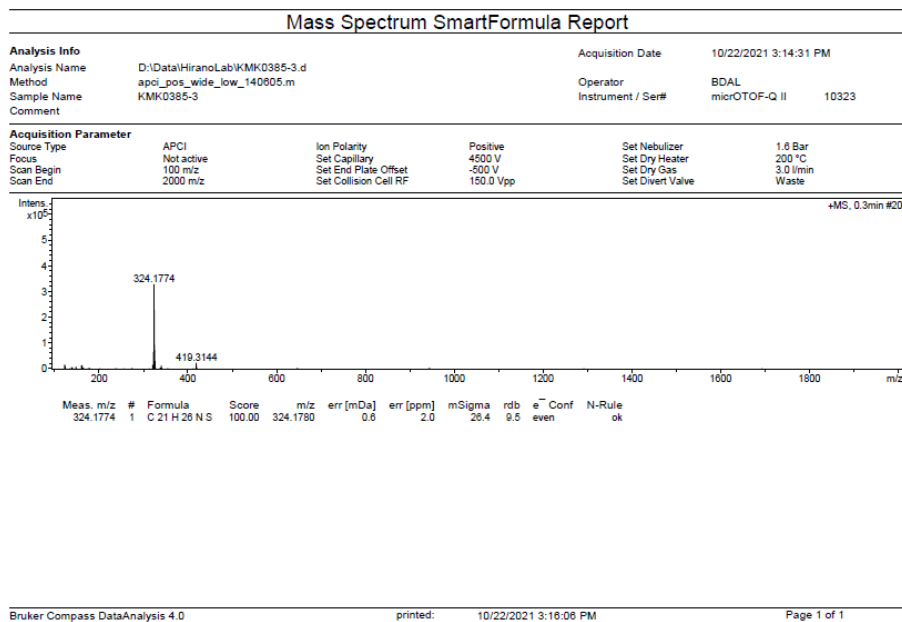

Figure S6. HRMS (APCI) data for (1*E*,3*E*,5*E*)-4aa.

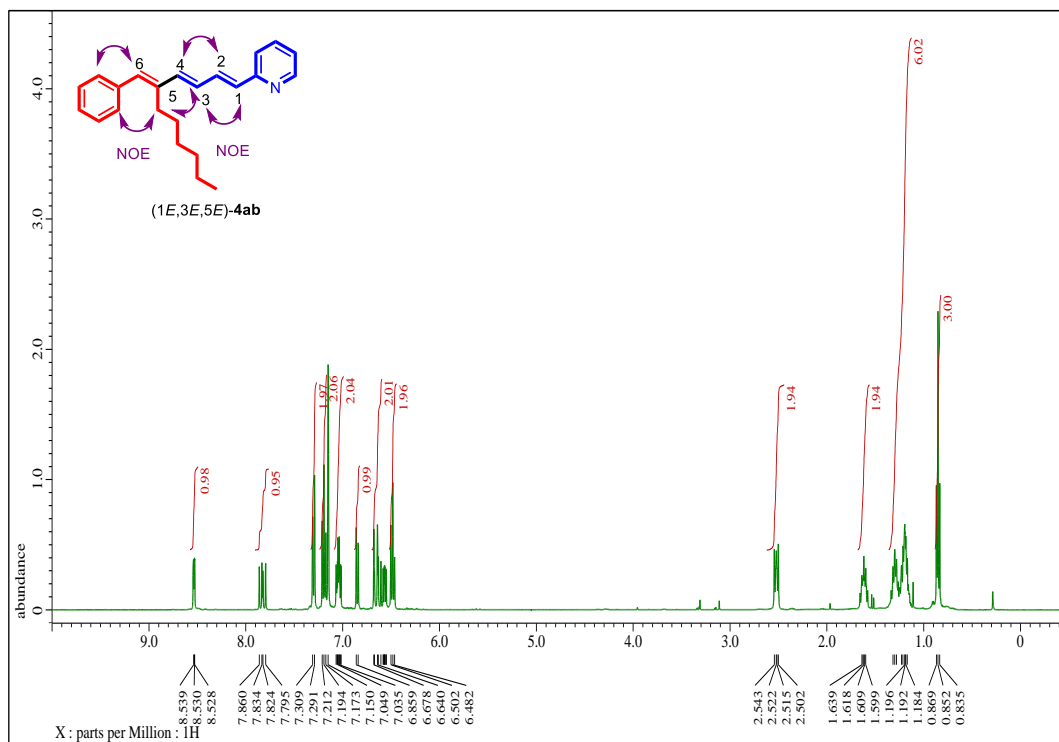

Figure S7. <sup>1</sup>H NMR Spectrum of (1*E*,3*E*,5*E*)-4ab in C<sub>6</sub>D<sub>6</sub>.

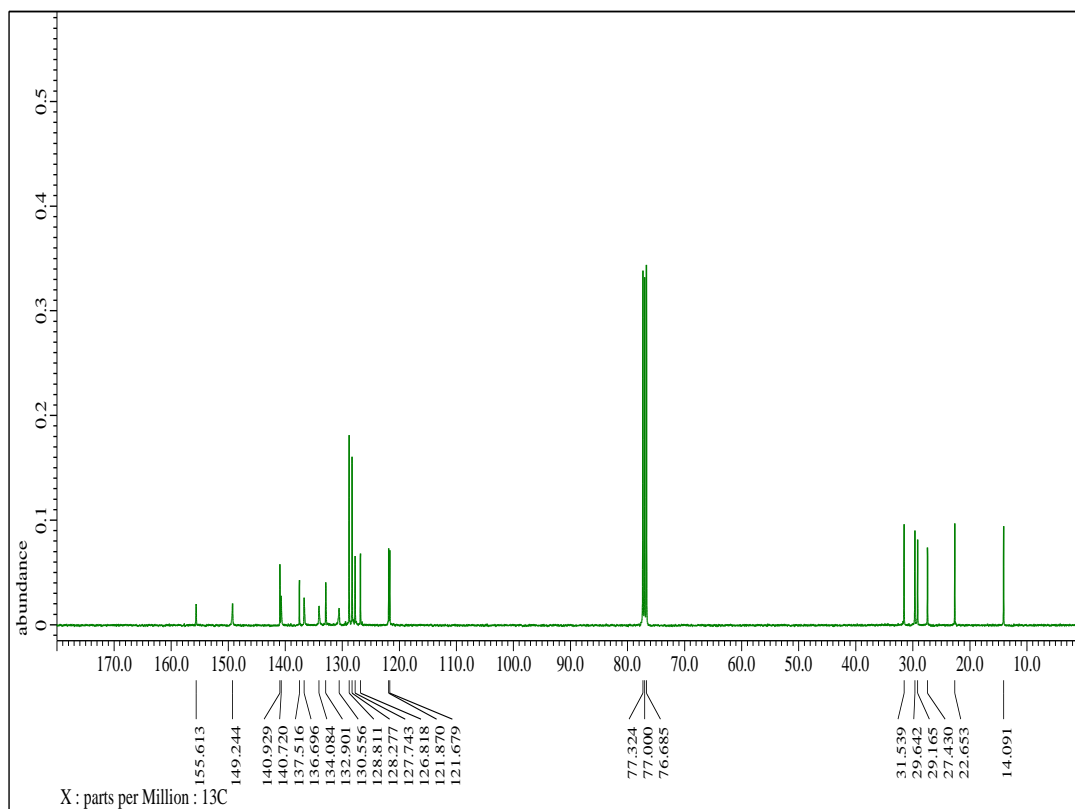

Figure S8. <sup>13</sup>C{<sup>1</sup>H} NMR Spectrum of (1*E*,3*E*,5*E*)-4ab in CDCl<sub>3</sub>.



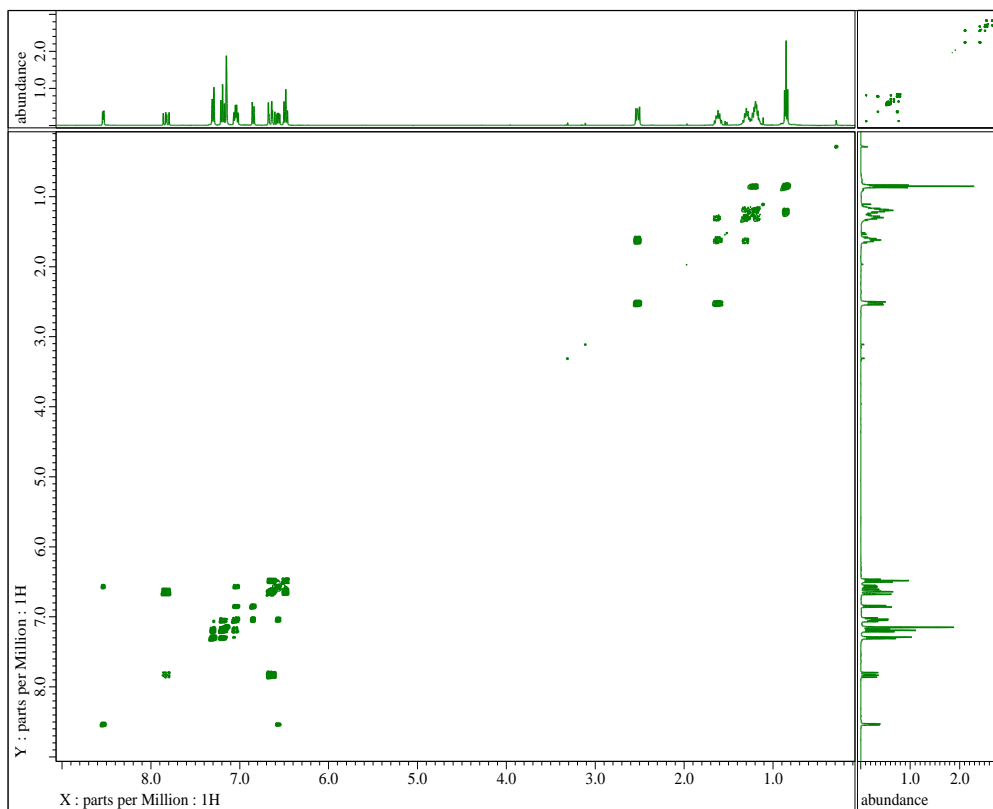

Figure S9.  $^1\text{H}$ - $^1\text{H}$  COSY NMR Spectrum of (1*E*,3*E*,5*E*)-4ab in  $\text{C}_6\text{D}_6$ .

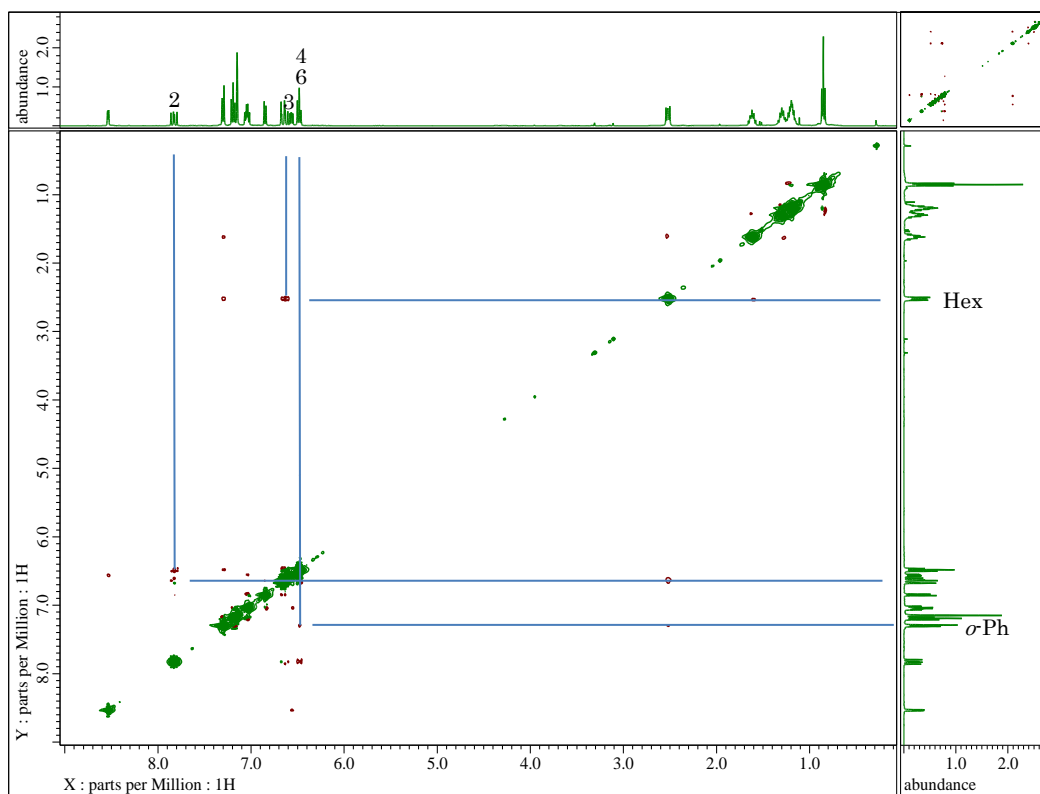

Figure S10.  $^1\text{H}$ - $^1\text{H}$  pNOESY NMR Spectrum of (1*E*,3*E*,5*E*)-4ab in  $\text{C}_6\text{D}_6$ .

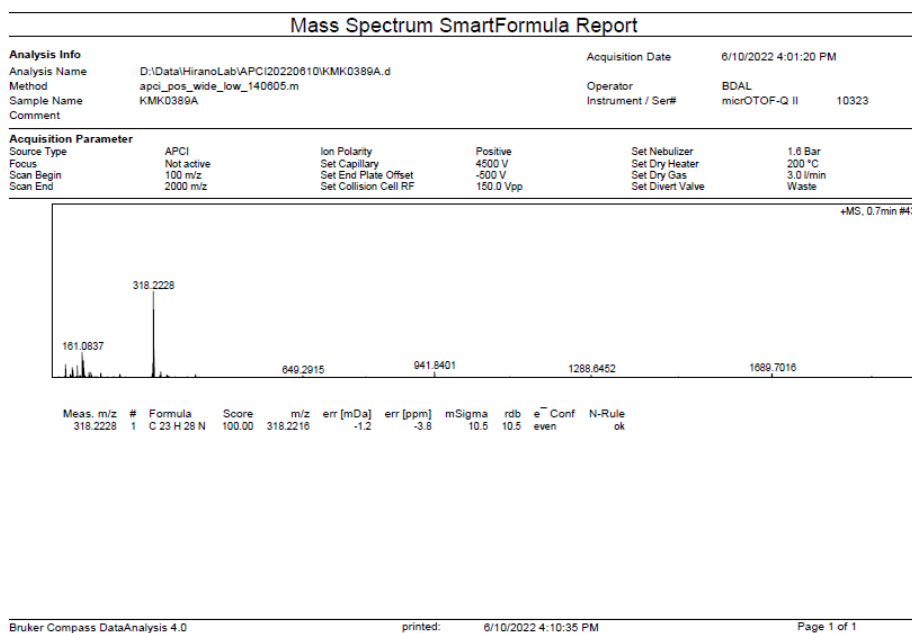

**Figure S11. HRMS (APCI) data for (1E,3E,5E)-4ab.**

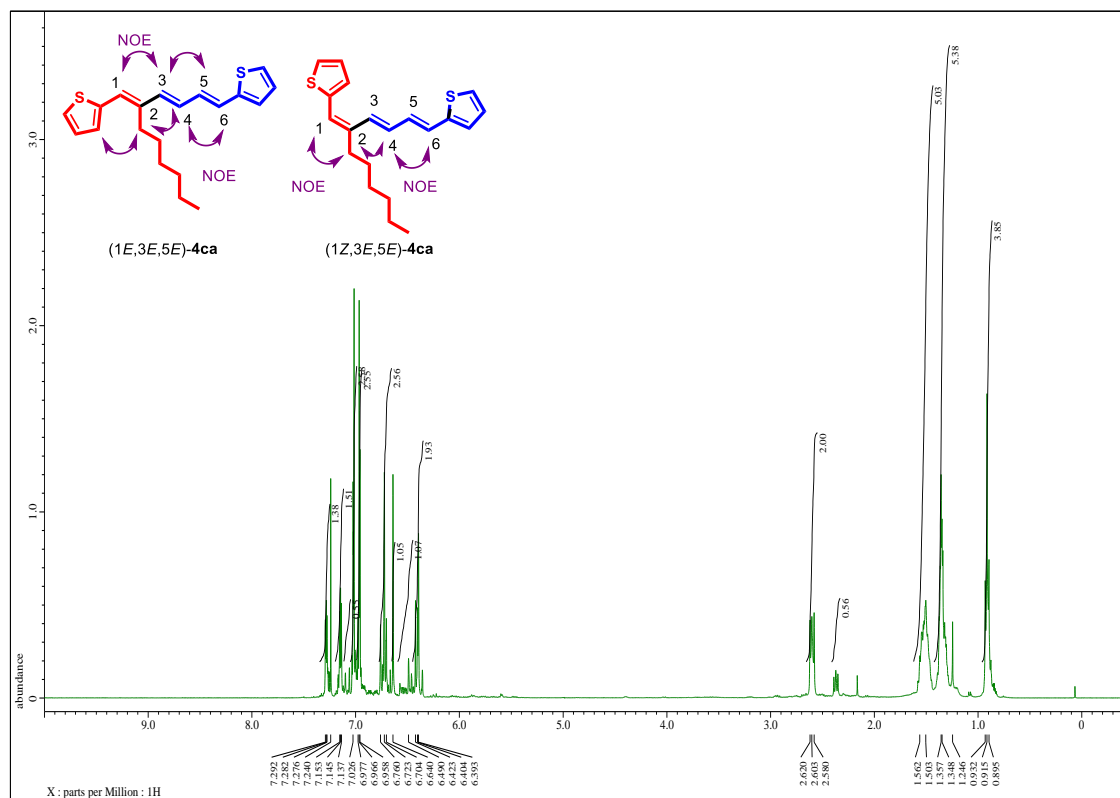

**Figure S12. <sup>1</sup>H NMR Spectrum of 4ca in CDCl<sub>3</sub>.**

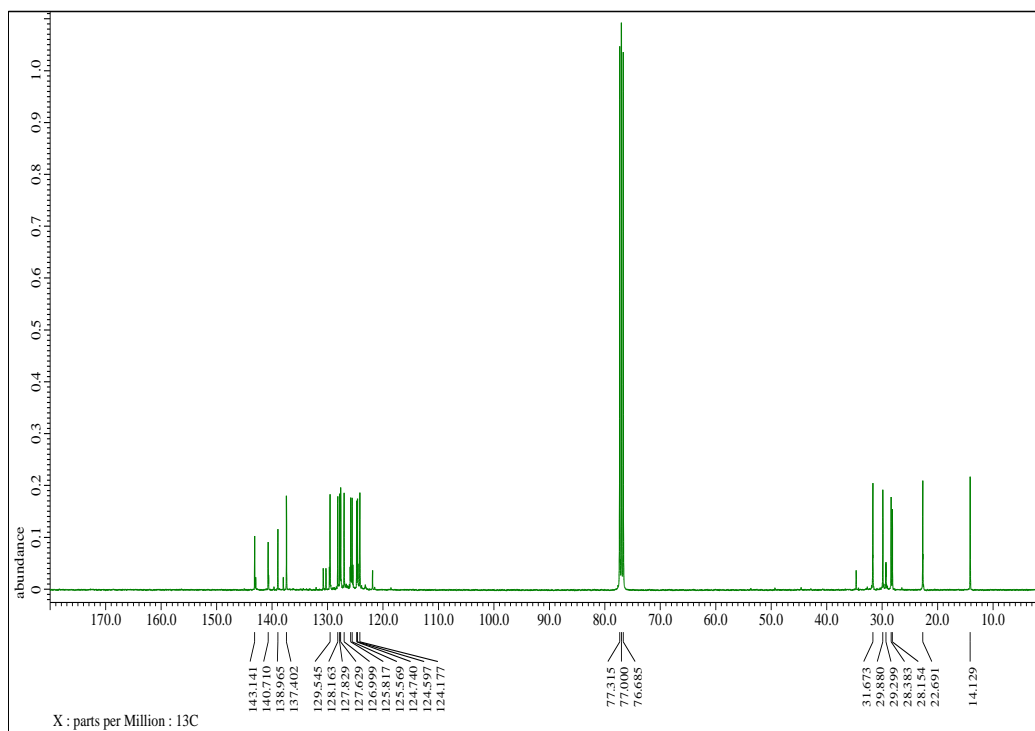

Figure S13.  $^{13}\text{C}\{^1\text{H}\}$  NMR Spectrum of 4ca in  $\text{CDCl}_3$ .

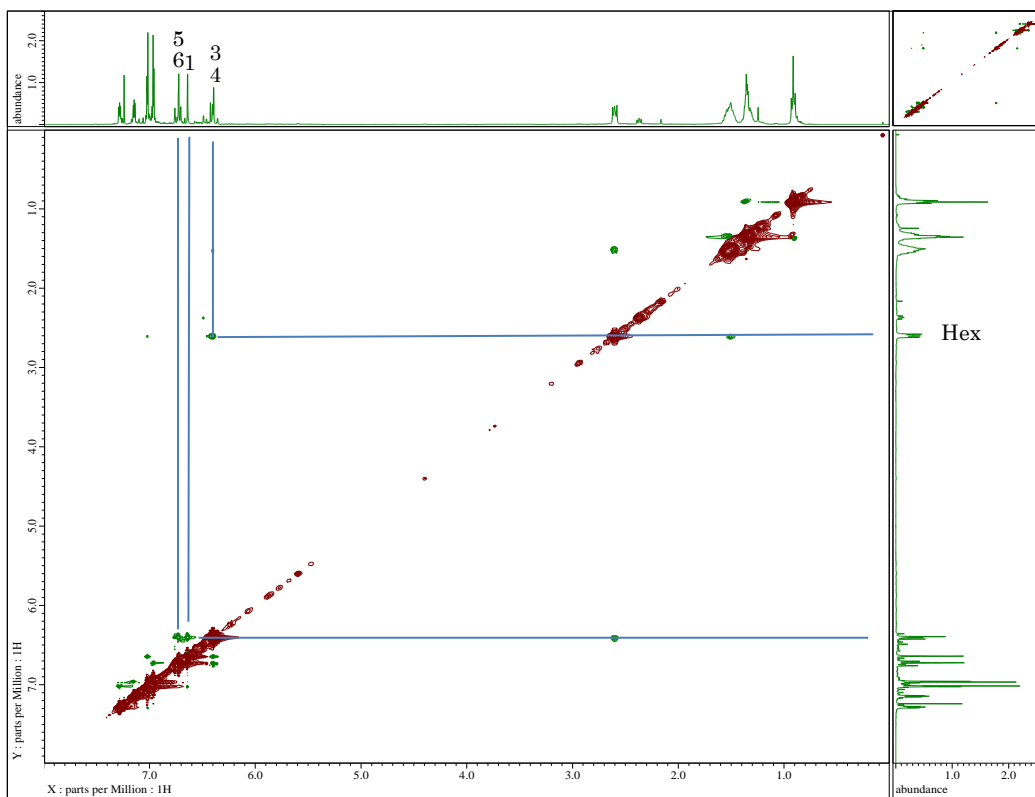

Figure S14.  $^1\text{H}$ - $^1\text{H}$  pNOESY NMR Spectrum of 4ca in  $\text{CDCl}_3$ .

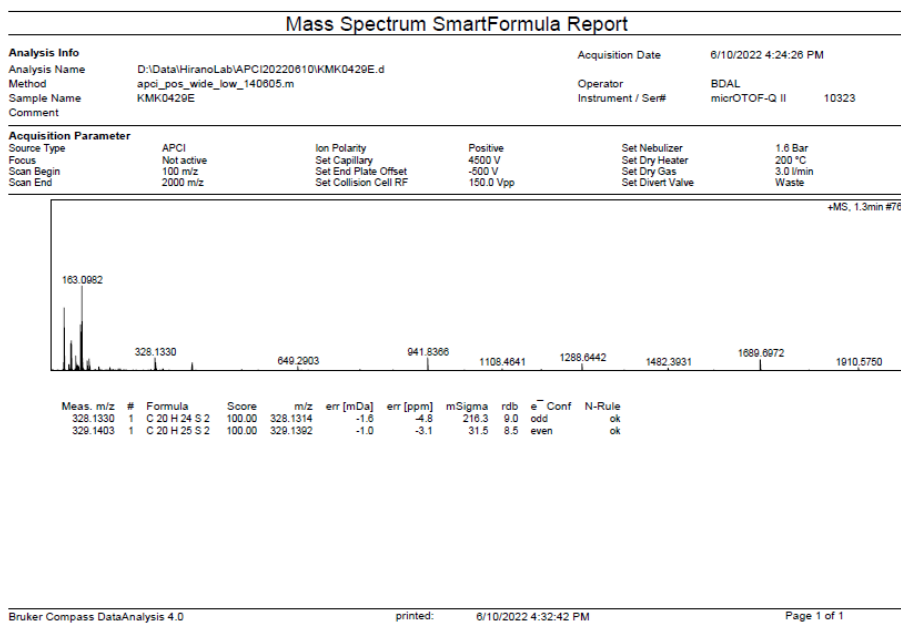

**Figure S15-1. HRMS (APCI) data for 4ca.**

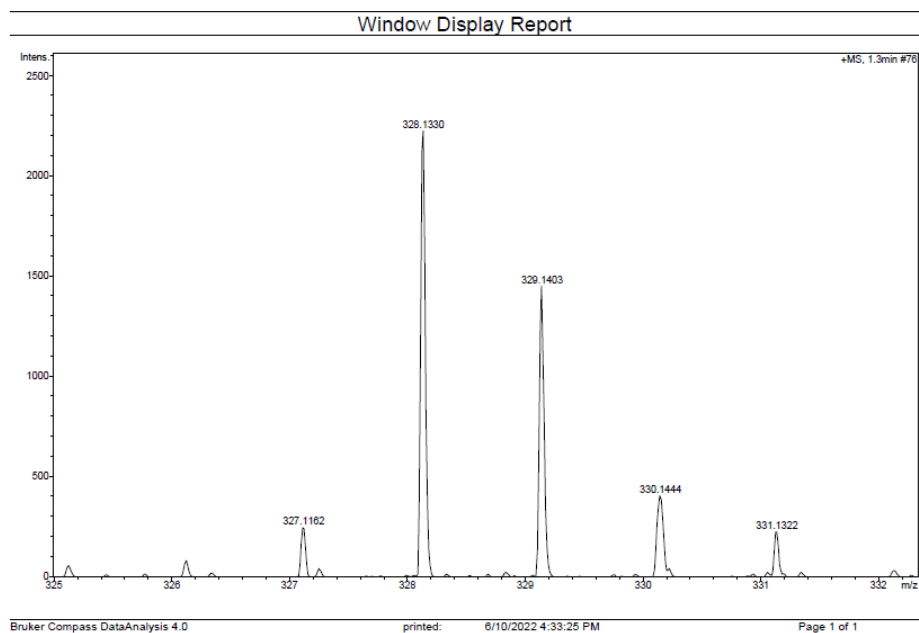

**Figure S15-2. HRMS (APCI) data for 4ca.**

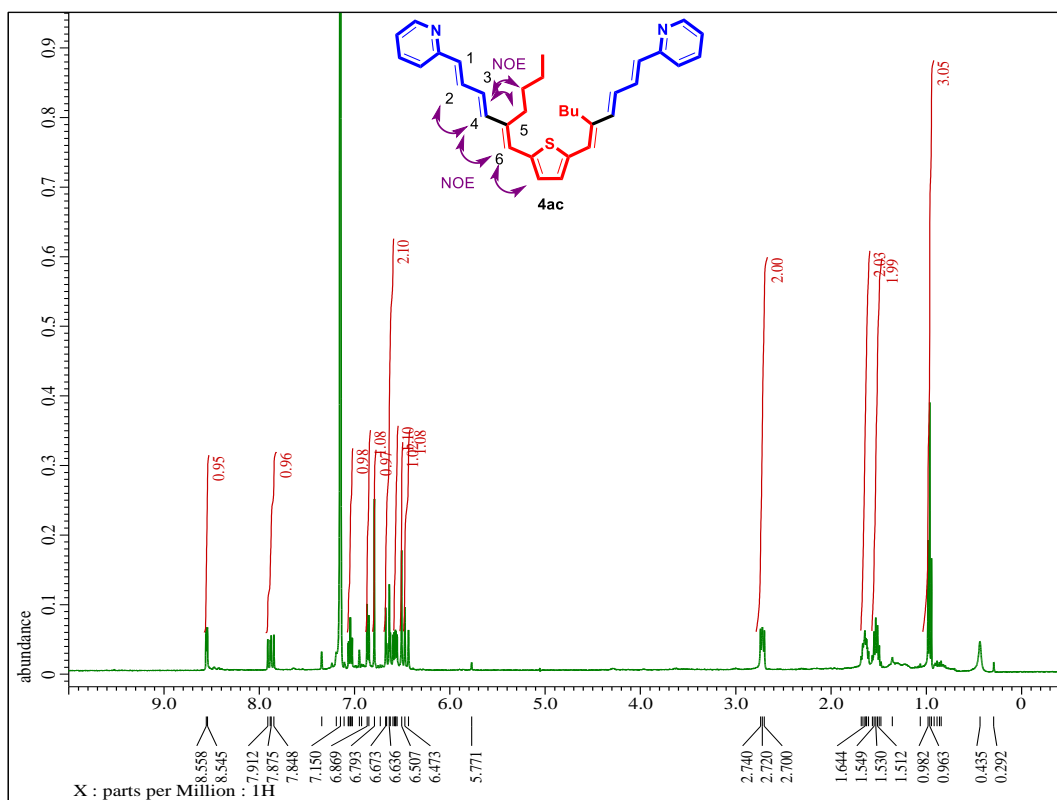

Figure S16.  $^1\text{H}$  NMR Spectrum of **4ac** in  $\text{C}_6\text{D}_6$ .

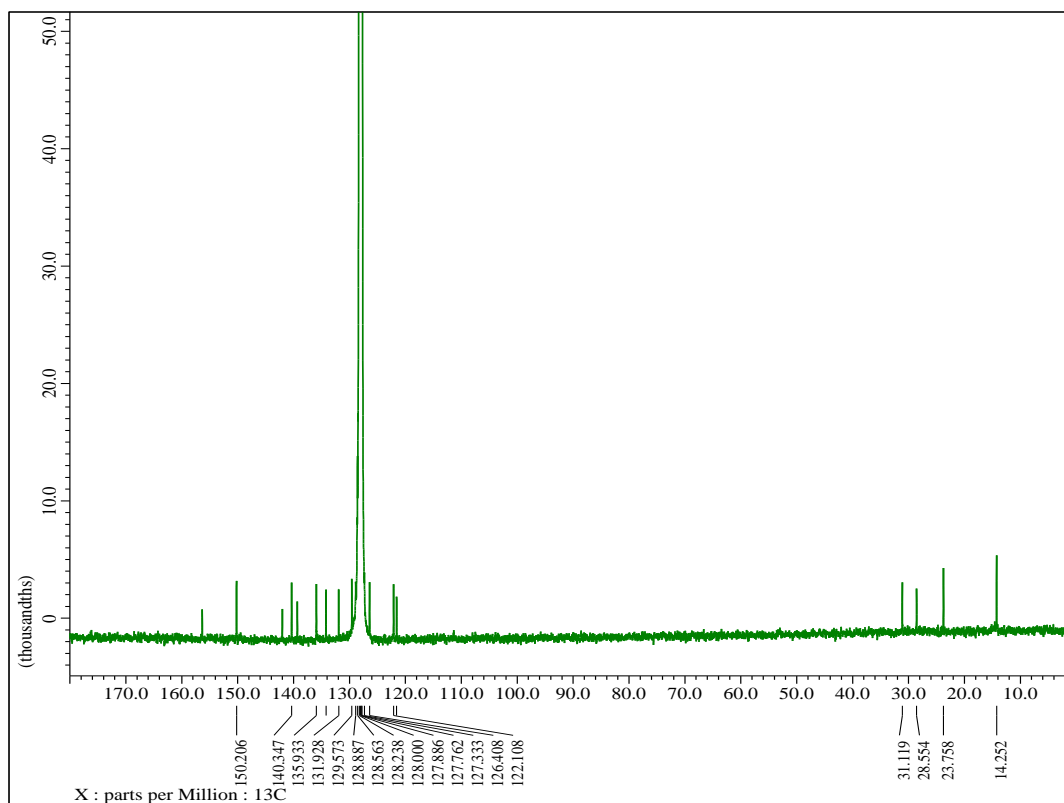

Figure S17.  $^{13}\text{C}\{^1\text{H}\}$  NMR Spectrum of **4ac** in  $\text{C}_6\text{D}_6$ .

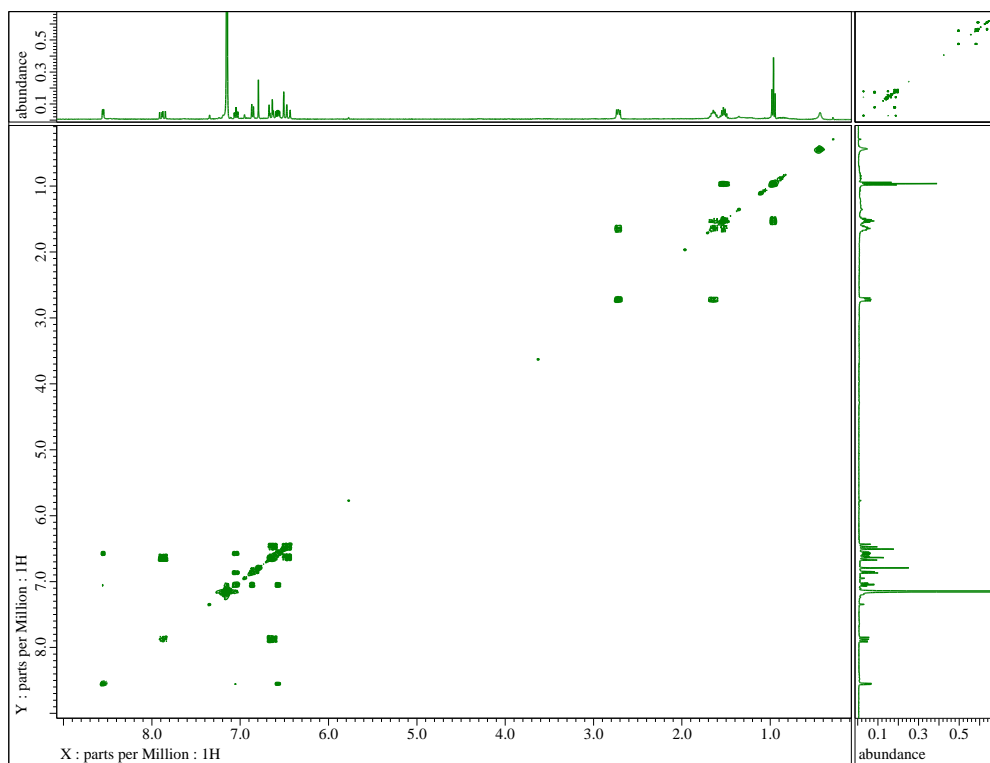

Figure S18.  $^1\text{H}$ - $^1\text{H}$  COSY NMR Spectrum of 4ac in  $\text{C}_6\text{D}_6$ .

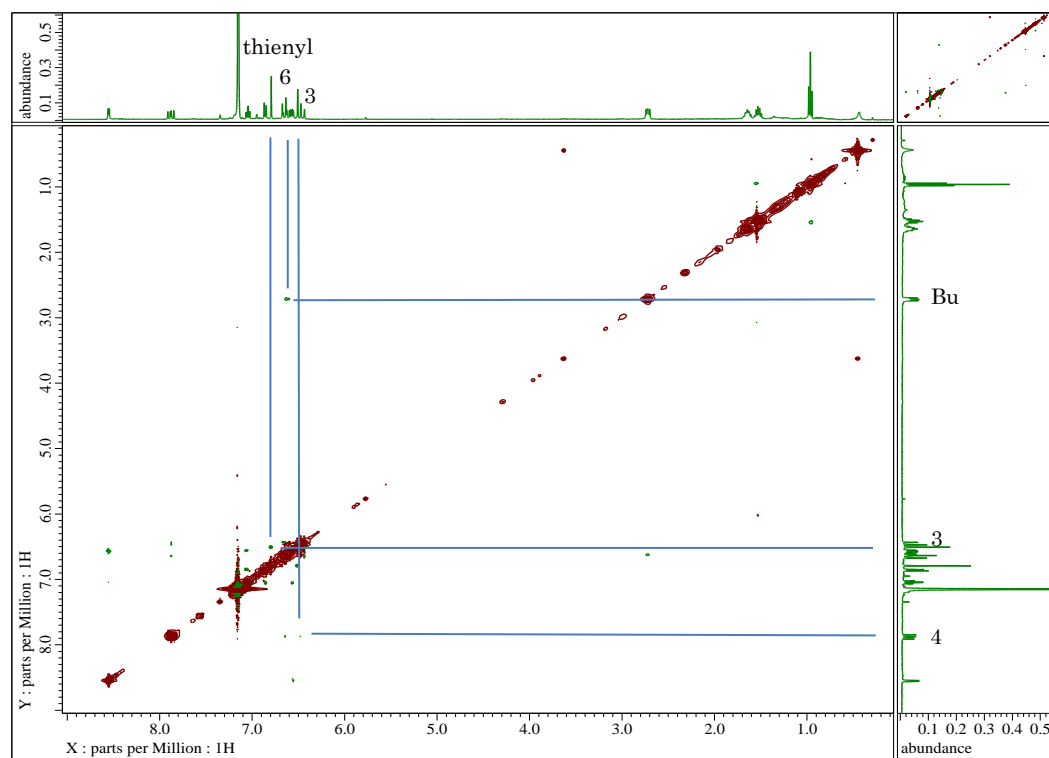

Figure S19.  $^1\text{H}$ - $^1\text{H}$  pNOESY NMR Spectrum of 4ac in  $\text{C}_6\text{D}_6$ .

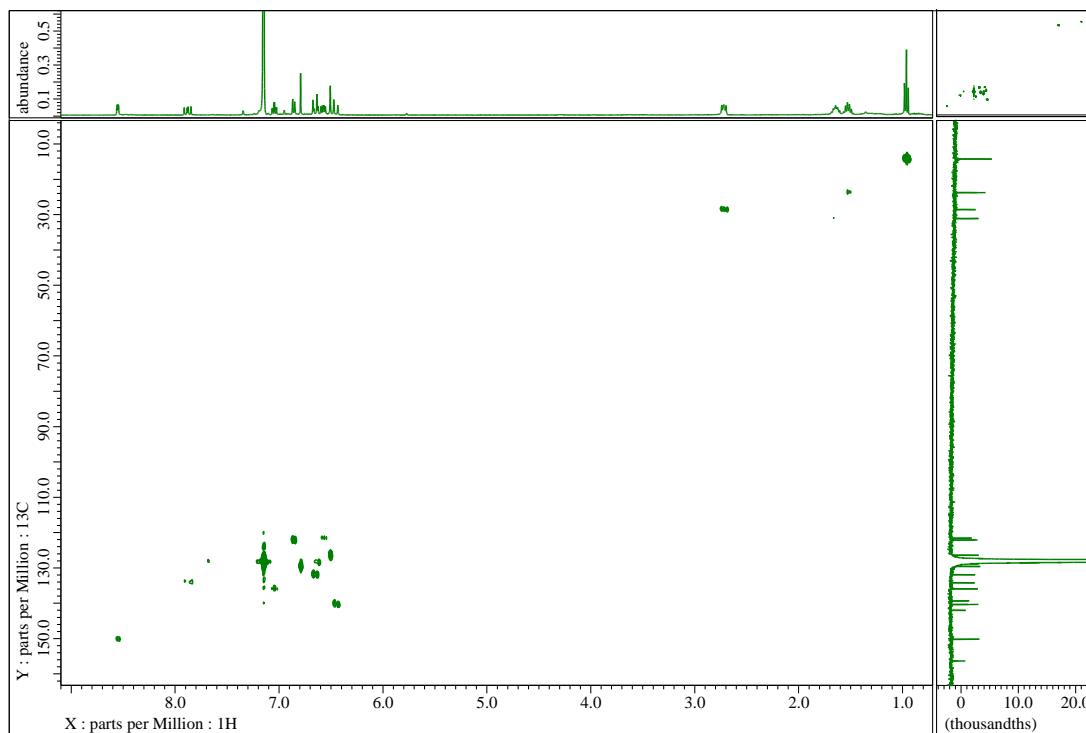

Figure S20.  $^{13}\text{C}$ - $^1\text{H}$  Correlation Spectrum of 4ac in  $\text{C}_6\text{D}_6$ .

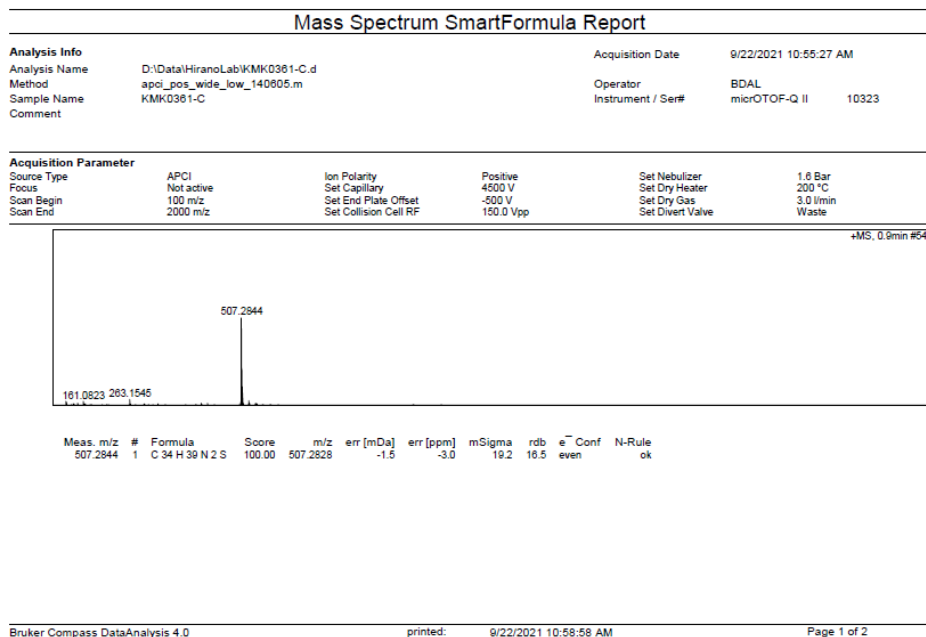

Figure S21. HRMS (APCI) data for 4ac.

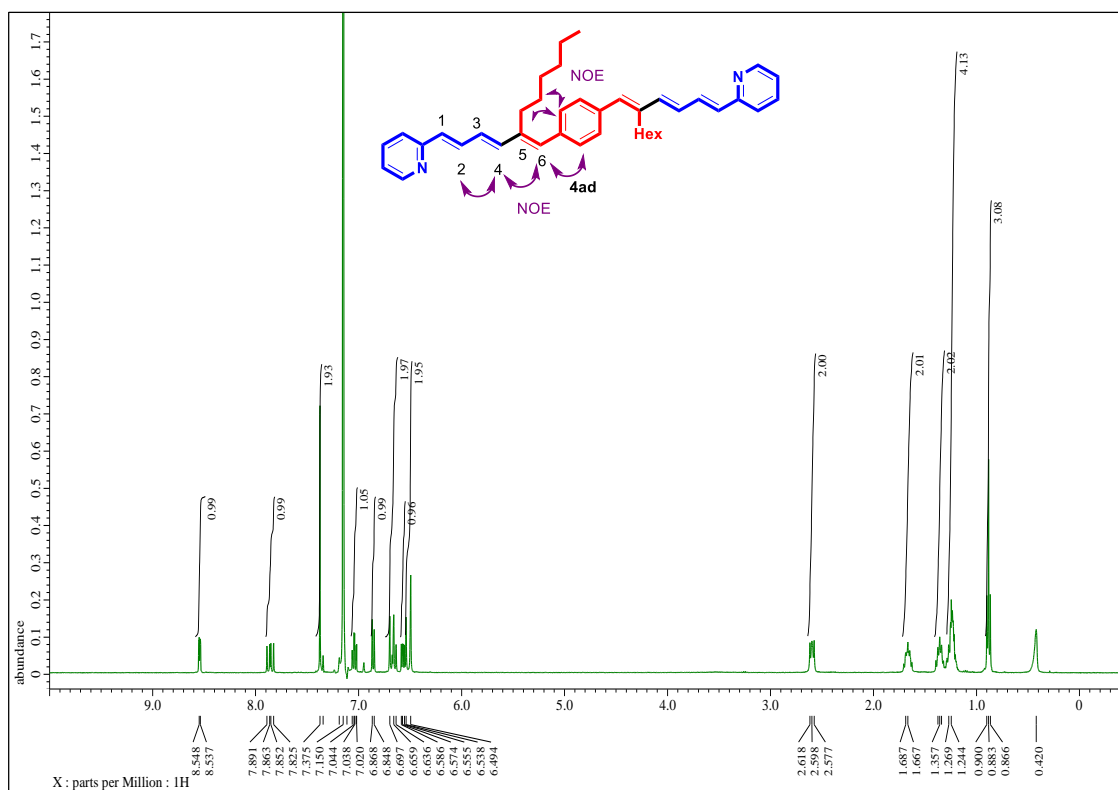

**Figure S22.  $^1\text{H}$  NMR Spectrum of 4ad in  $\text{C}_6\text{D}_6$ .**

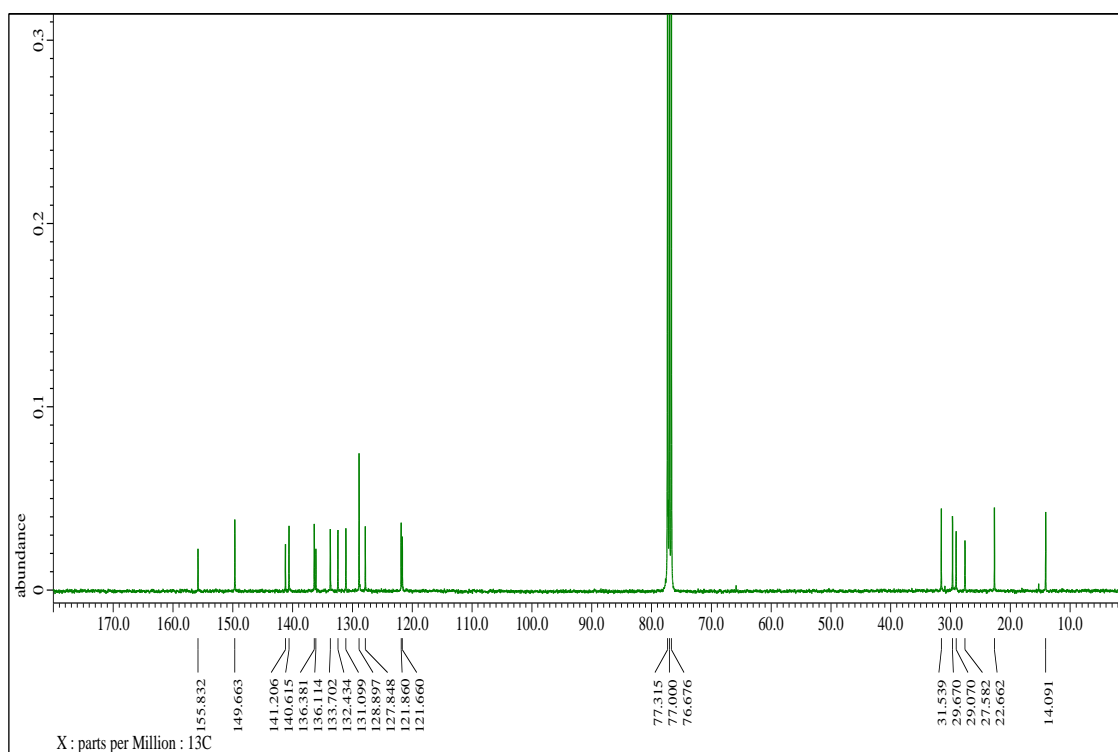

**Figure S23.  $^{13}\text{C}\{^1\text{H}\}$  NMR Spectrum of 4ad in  $\text{CDCl}_3$ .**



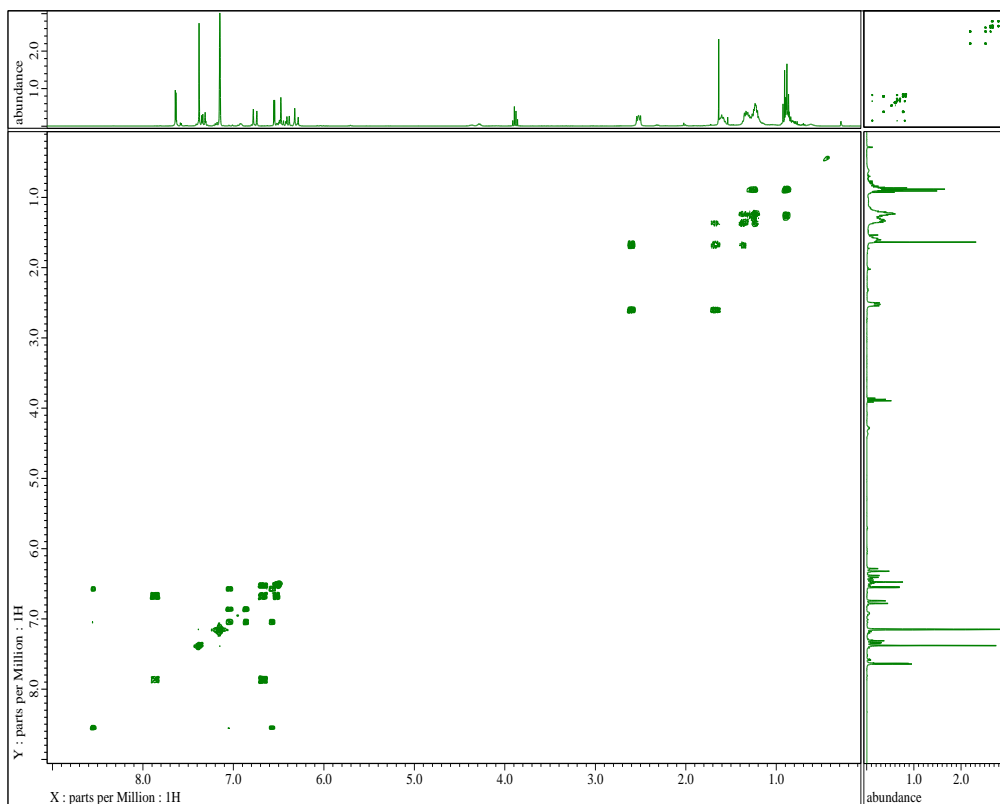

Figure S24.  $^1\text{H}$ - $^1\text{H}$  COSY NMR Spectrum of 4ad in  $\text{C}_6\text{D}_6$ .

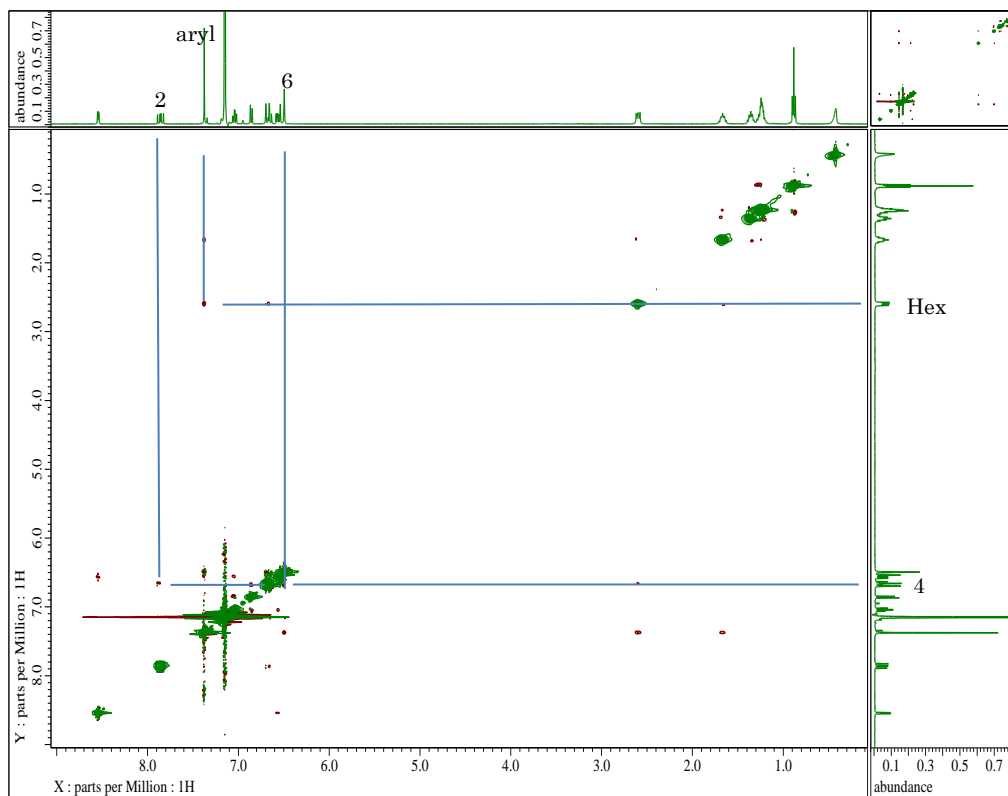

Figure S25.  $^1\text{H}$ - $^1\text{H}$  pNOESY NMR Spectrum of 4ad in  $\text{C}_6\text{D}_6$ .

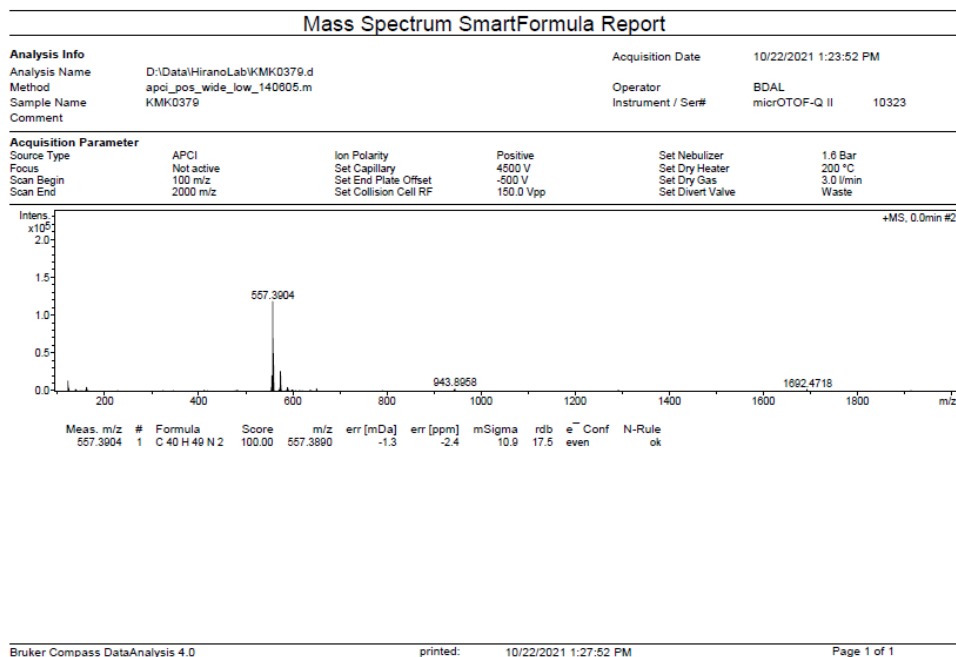

**Figure S26. HRMS (APCI) data for 4ad.**

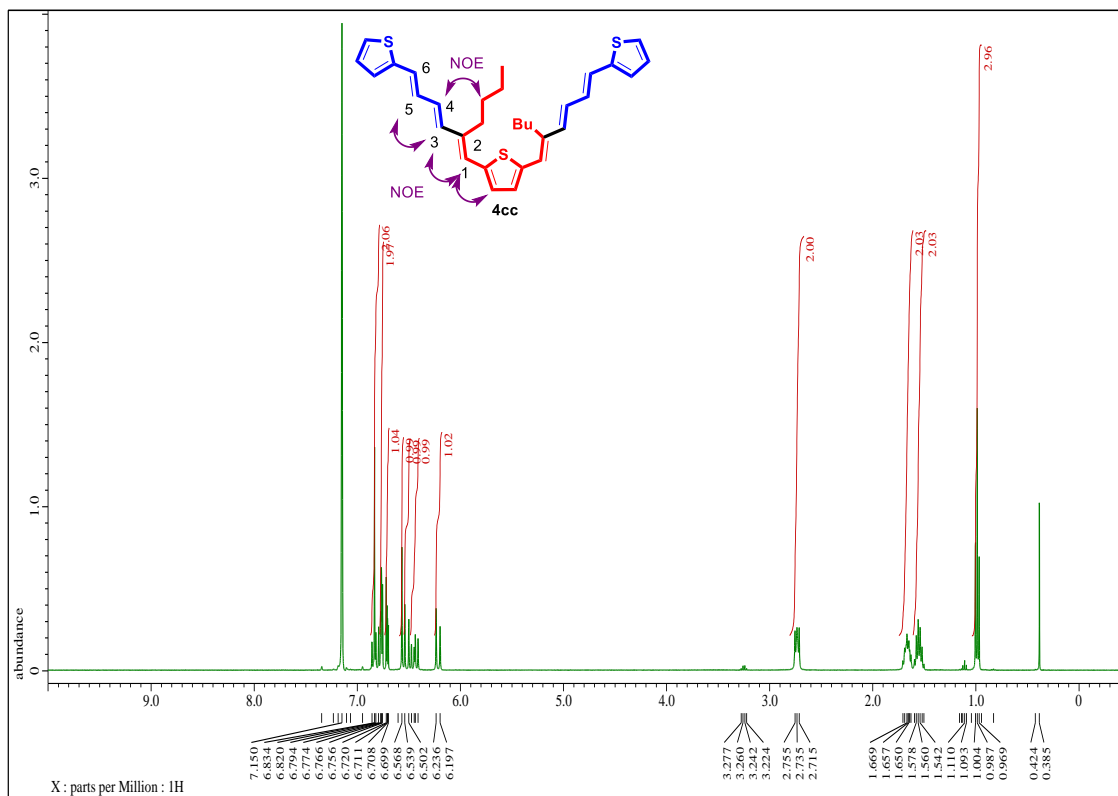

**Figure S27. <sup>1</sup>H NMR Spectrum of 4cc in C<sub>6</sub>D<sub>6</sub>.**

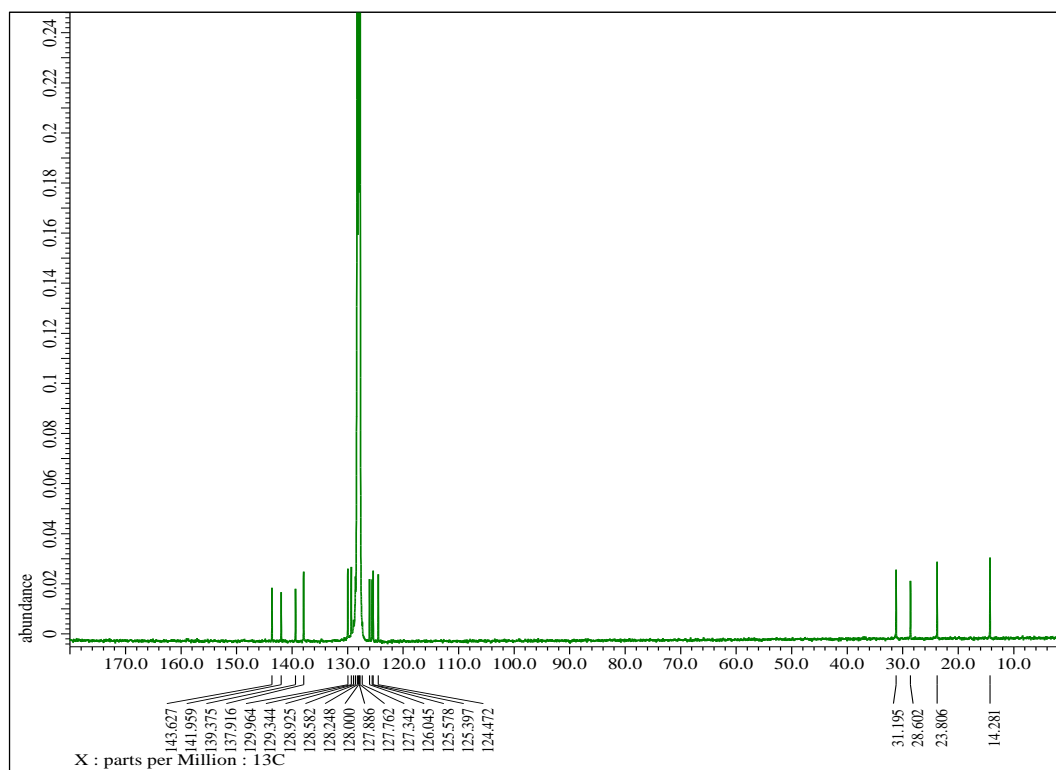

Figure S28.  $^{13}\text{C}\{^1\text{H}\}$  NMR Spectrum of 4cc in  $\text{C}_6\text{D}_6$ .

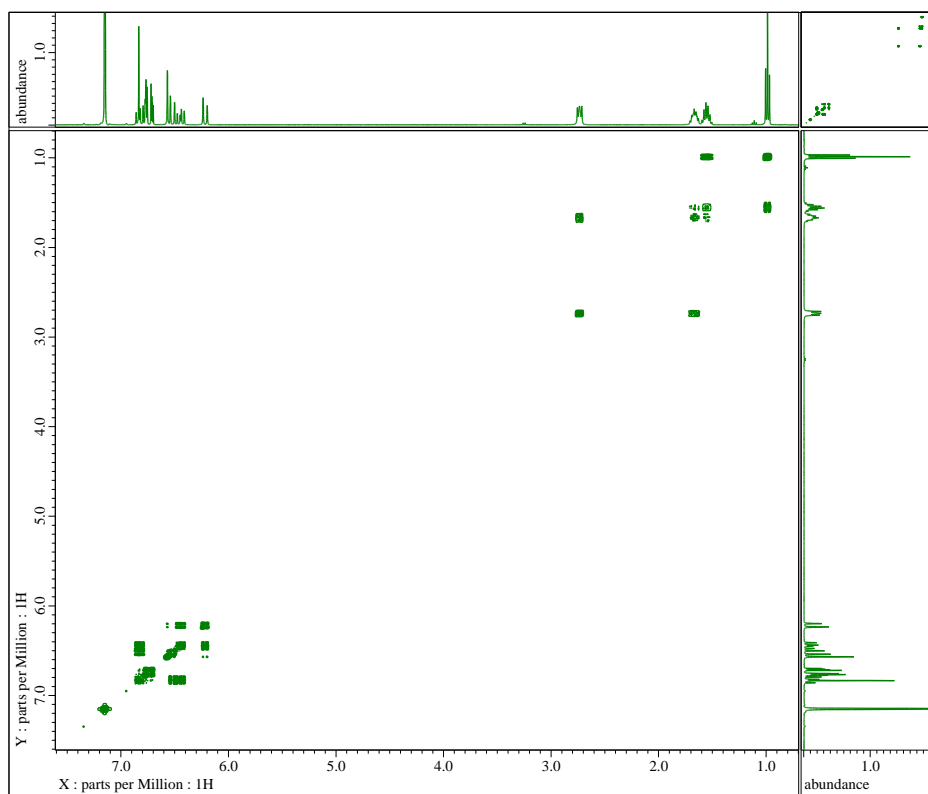

Figure S29.  $^1\text{H}$ - $^1\text{H}$  COSY NMR Spectrum of 4cc in  $\text{C}_6\text{D}_6$ .

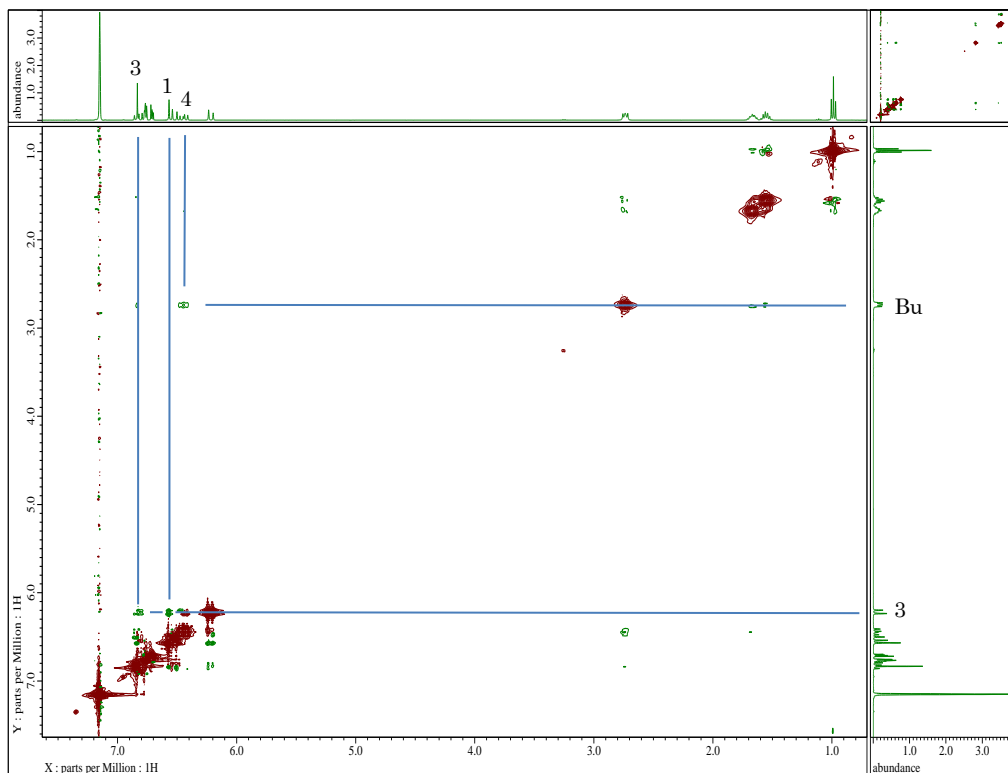

Figure S30.  $^1\text{H}$ - $^1\text{H}$  pNOESY NMR Spectrum of 4cc in  $\text{C}_6\text{D}_6$ .

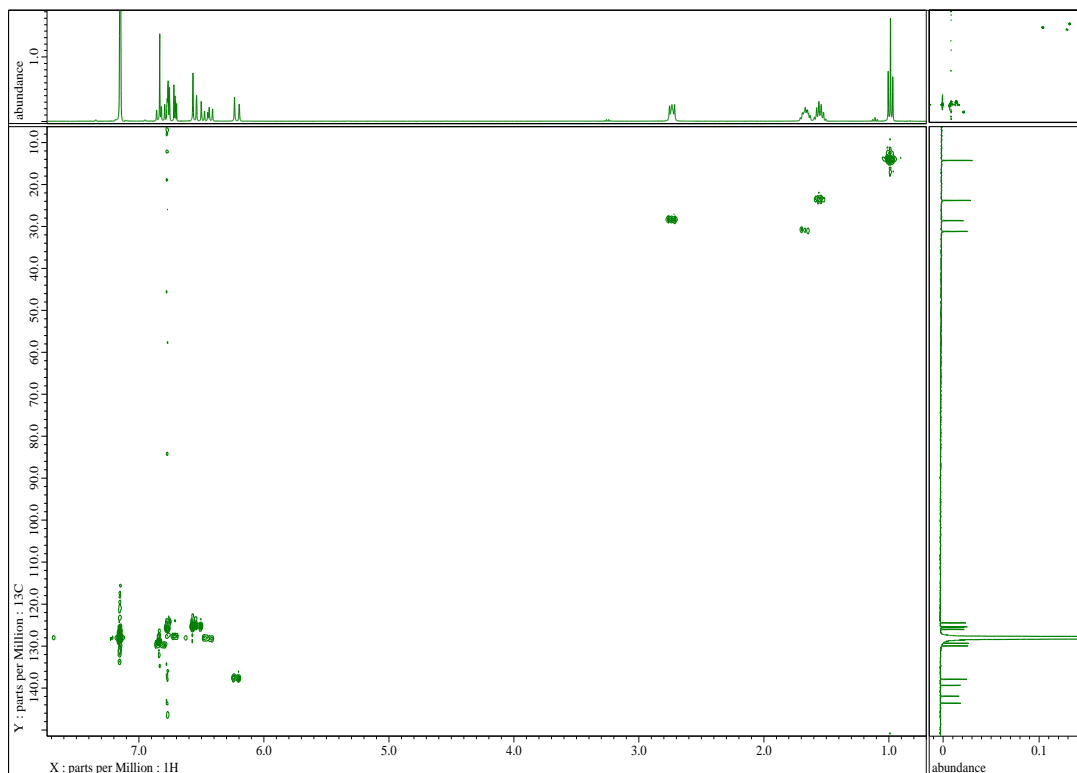

Figure S31.  $^{13}\text{C}$ - $^1\text{H}$  Correlation Spectrum of 4cc in  $\text{C}_6\text{D}_6$ .

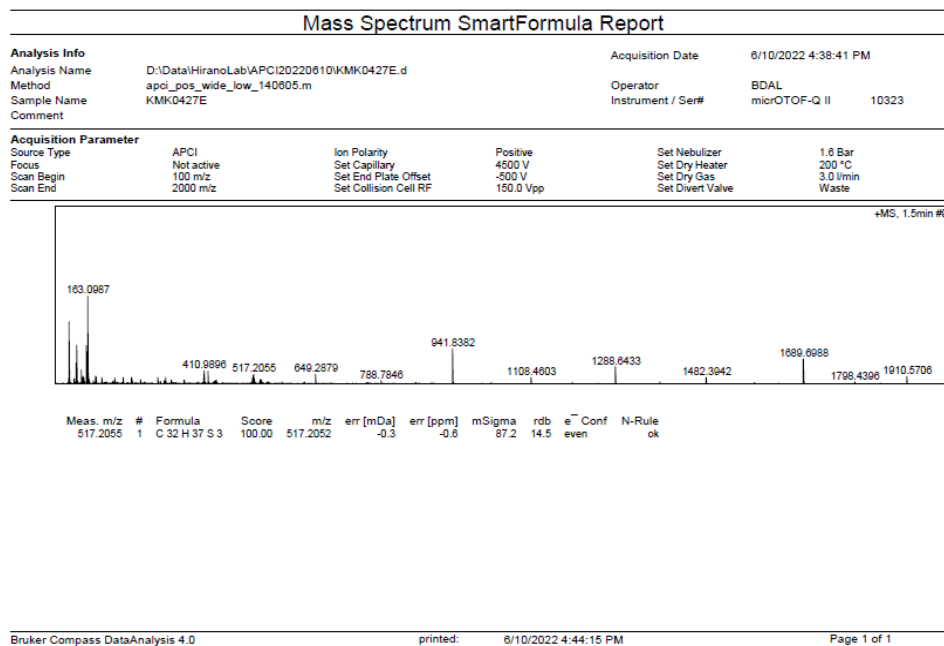

**Figure S32. HRMS (APCI) data for 4cc.**

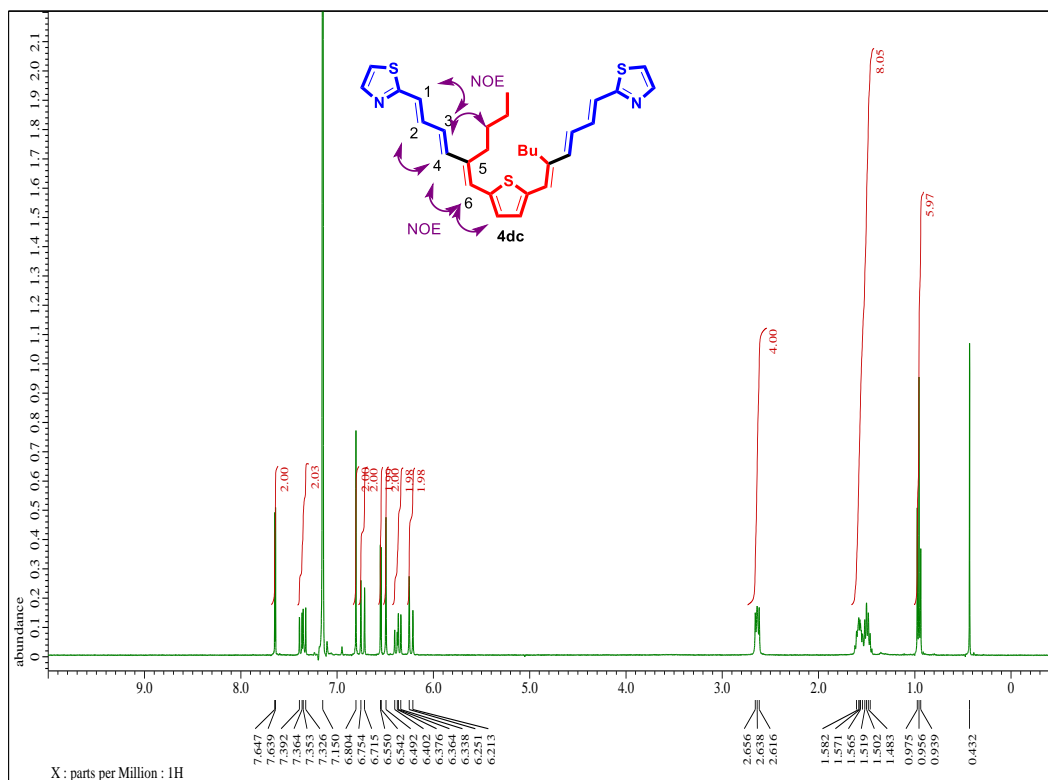

**Figure S33. <sup>1</sup>H NMR Spectrum of 4dc in C<sub>6</sub>D<sub>6</sub>.**

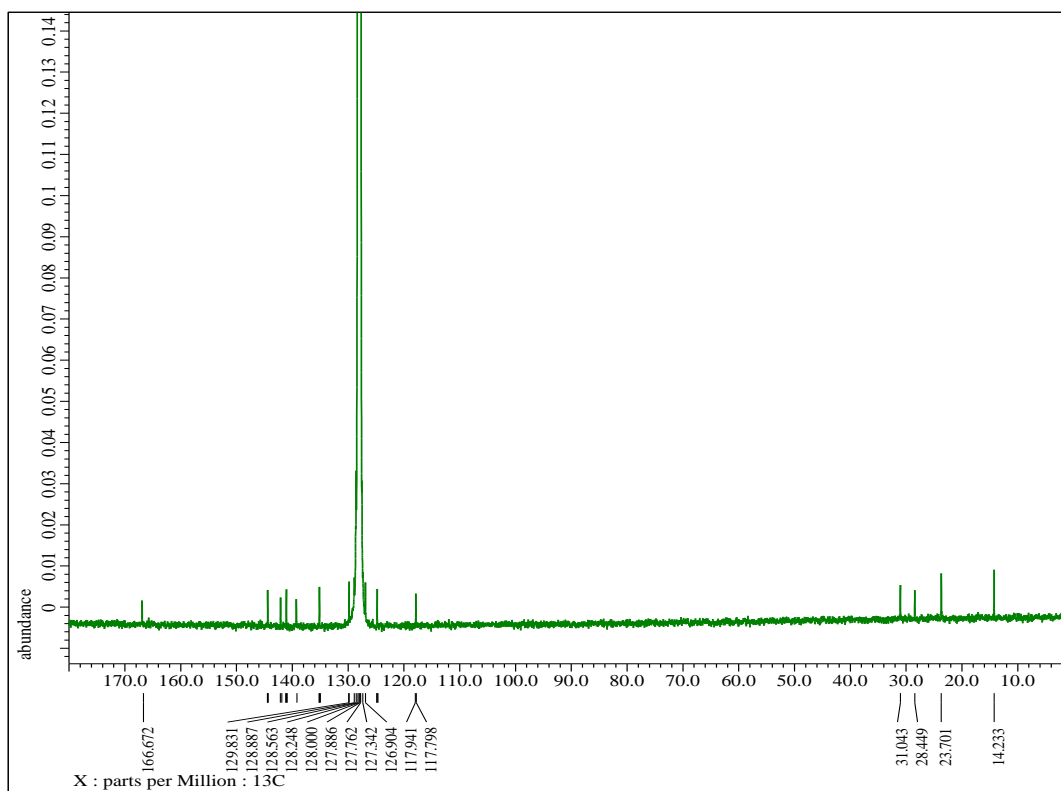

**Figure S34.**  $^{13}\text{C}\{^1\text{H}\}$  NMR Spectrum of 4dc in  $\text{C}_6\text{D}_6$ .

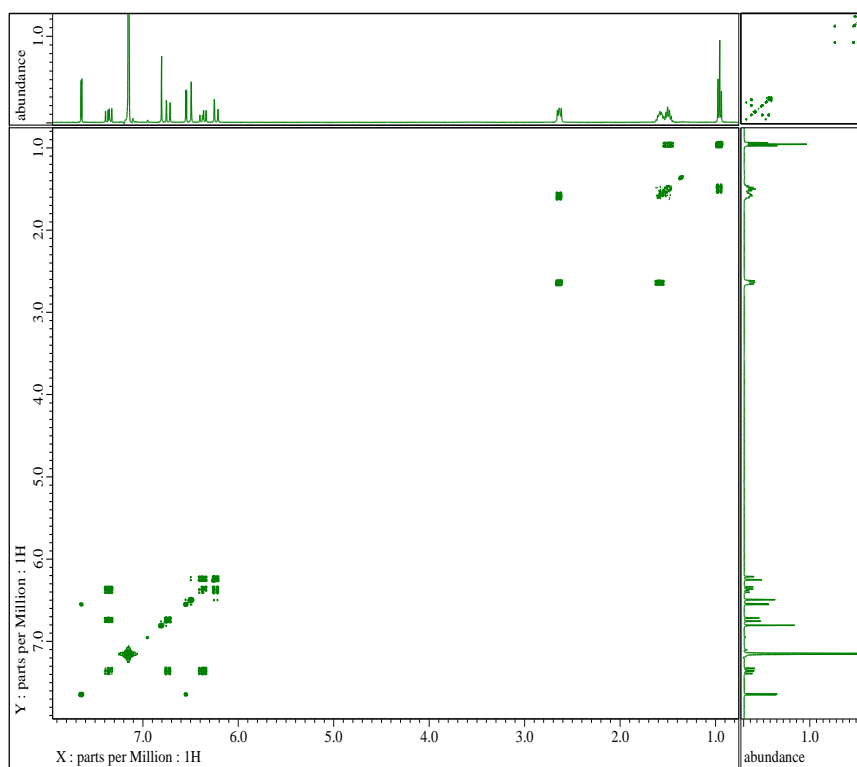

**Figure S35.**  $^1\text{H}$ - $^1\text{H}$  COSY NMR Spectrum of 4dc in  $\text{C}_6\text{D}_6$ .

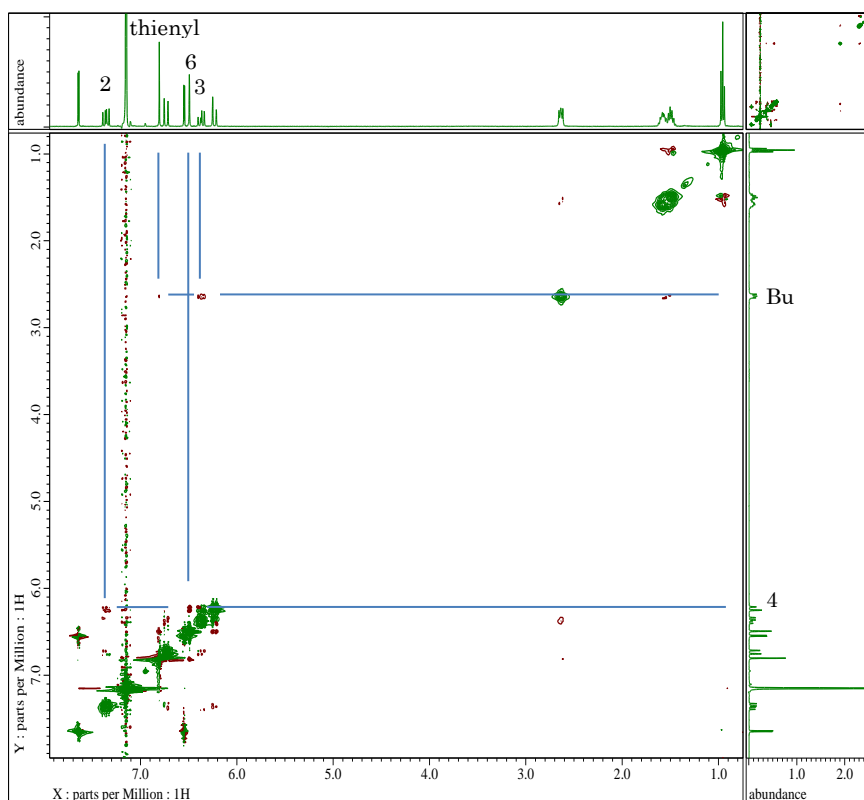

Figure S36.  $^1\text{H}$ - $^1\text{H}$  pNOESY NMR Spectrum of 4dc in  $\text{C}_6\text{D}_6$ .

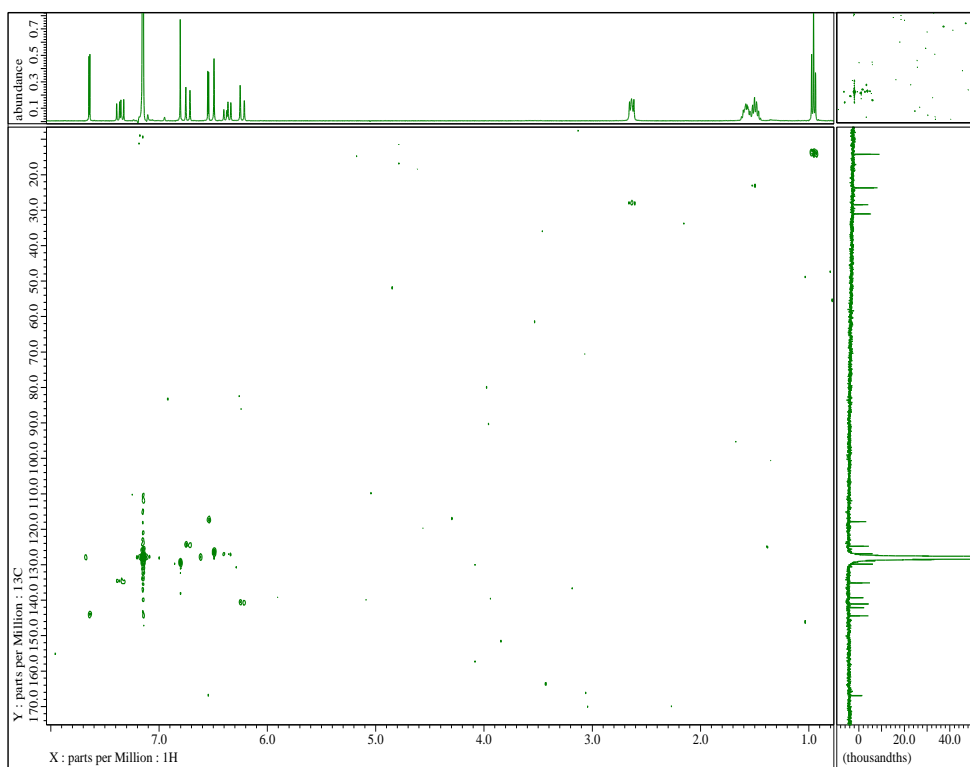

Figure S37.  $^{13}\text{C}$ - $^1\text{H}$  Correlation Spectrum of 4dc in  $\text{C}_6\text{D}_6$ .

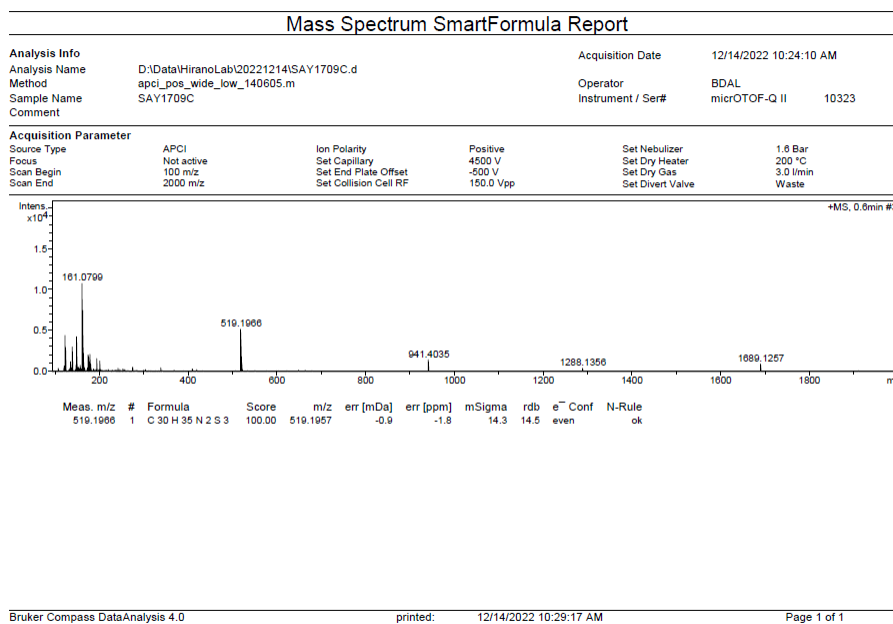

**Figure S38. HRMS (APCI) data for 4dc.**

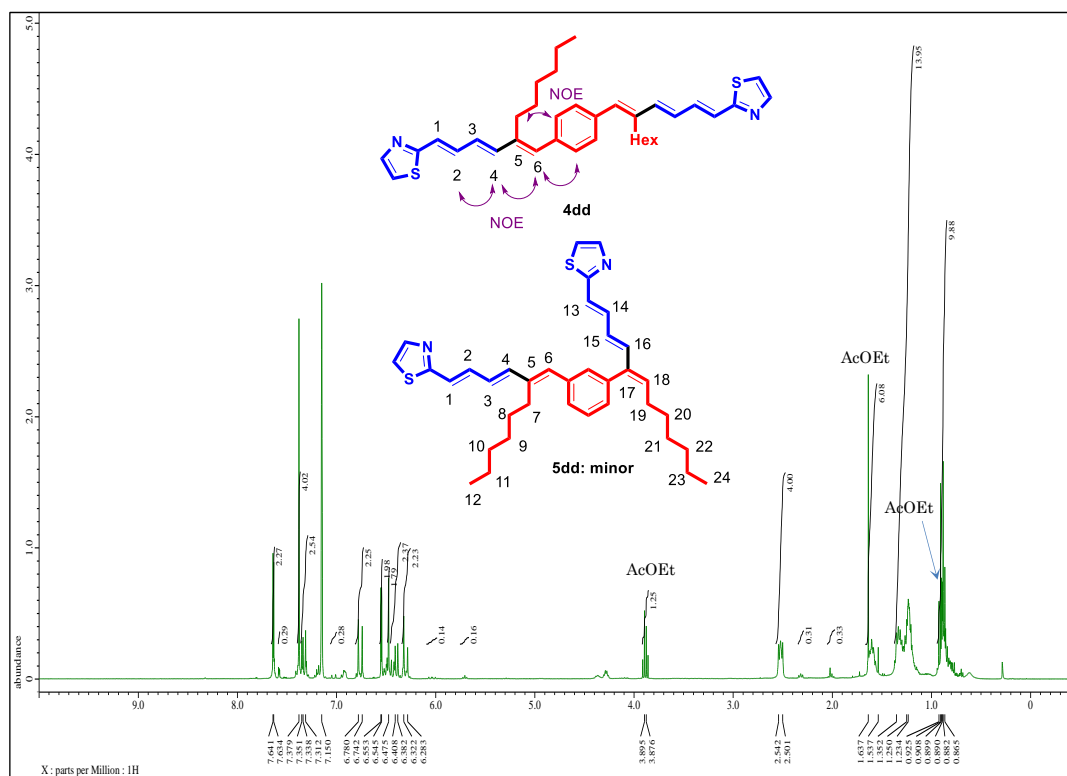



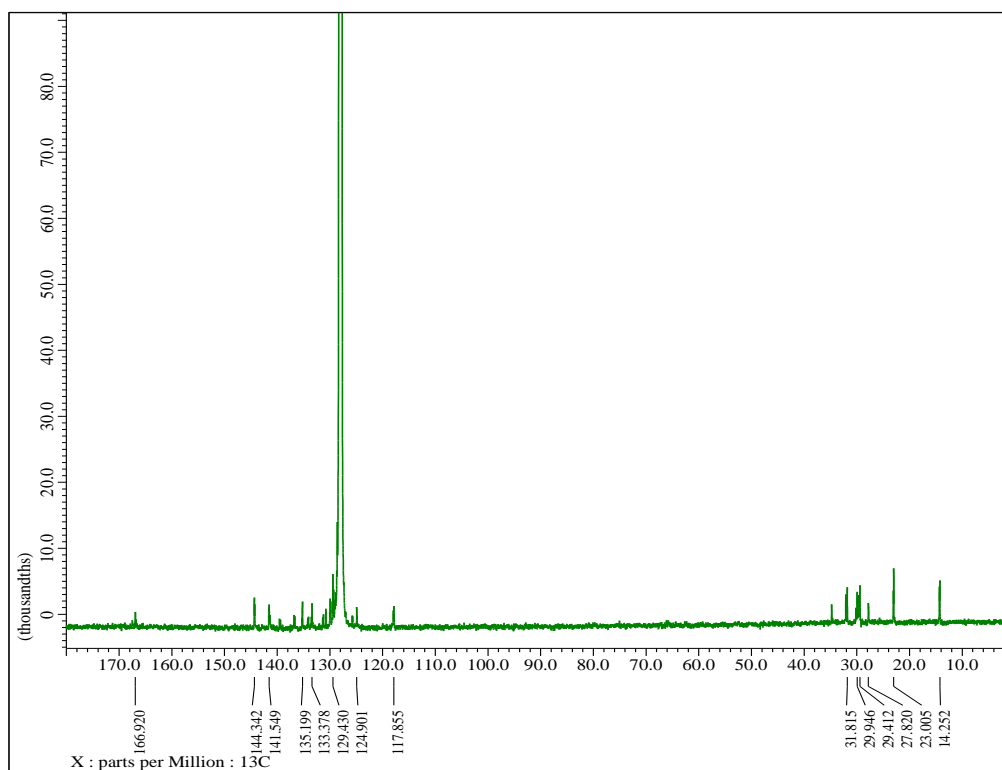

Figure S40.  $^{13}\text{C}\{^1\text{H}\}$  NMR Spectrum of 4dd (included 5dd) in  $\text{C}_6\text{D}_6$ .

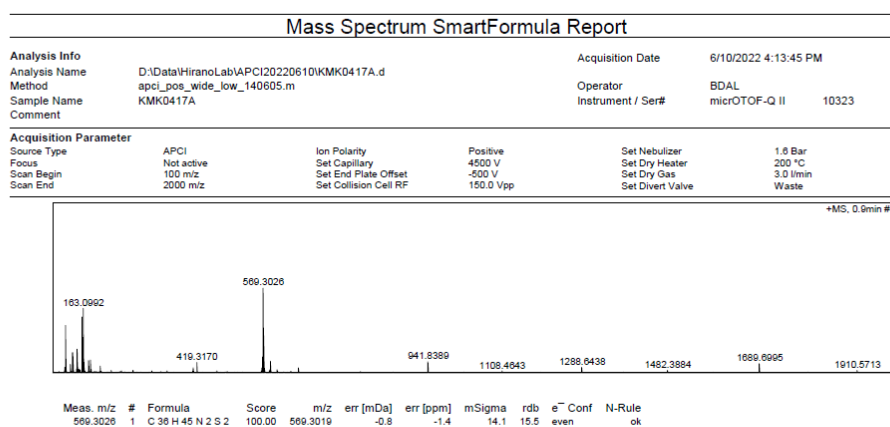

Figure S41. HRMS (APCI) data for 4dd (included 5dd).

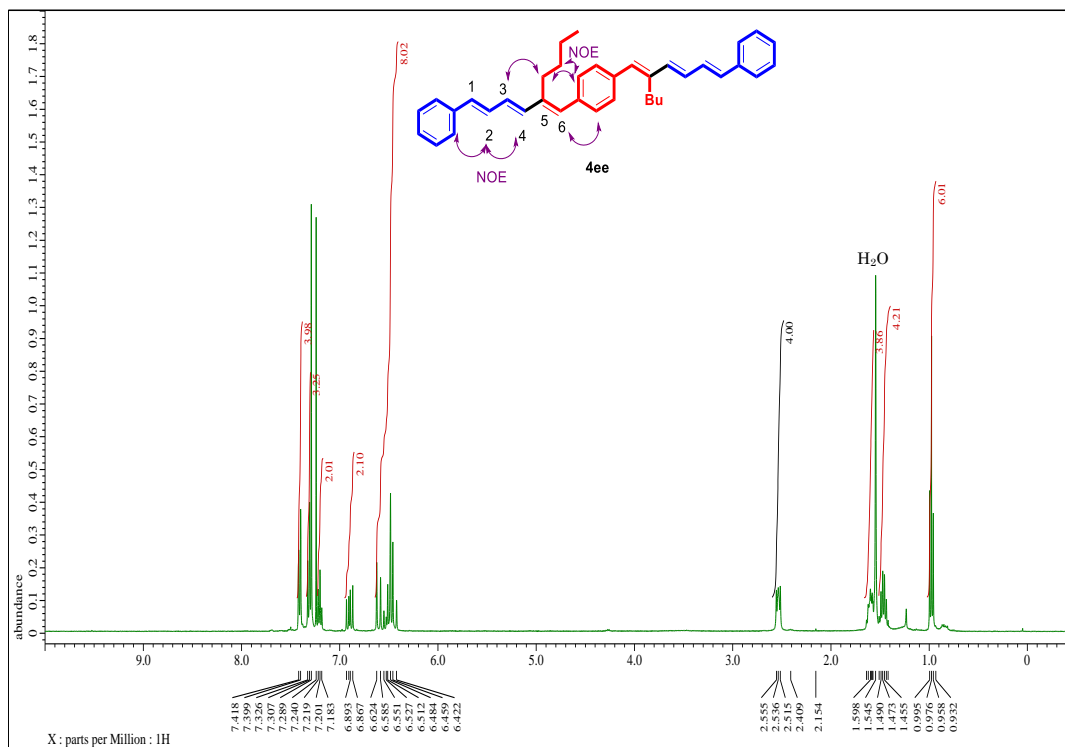

Figure S42.  $^1\text{H}$  NMR Spectrum of 4ee in  $\text{CDCl}_3$ .

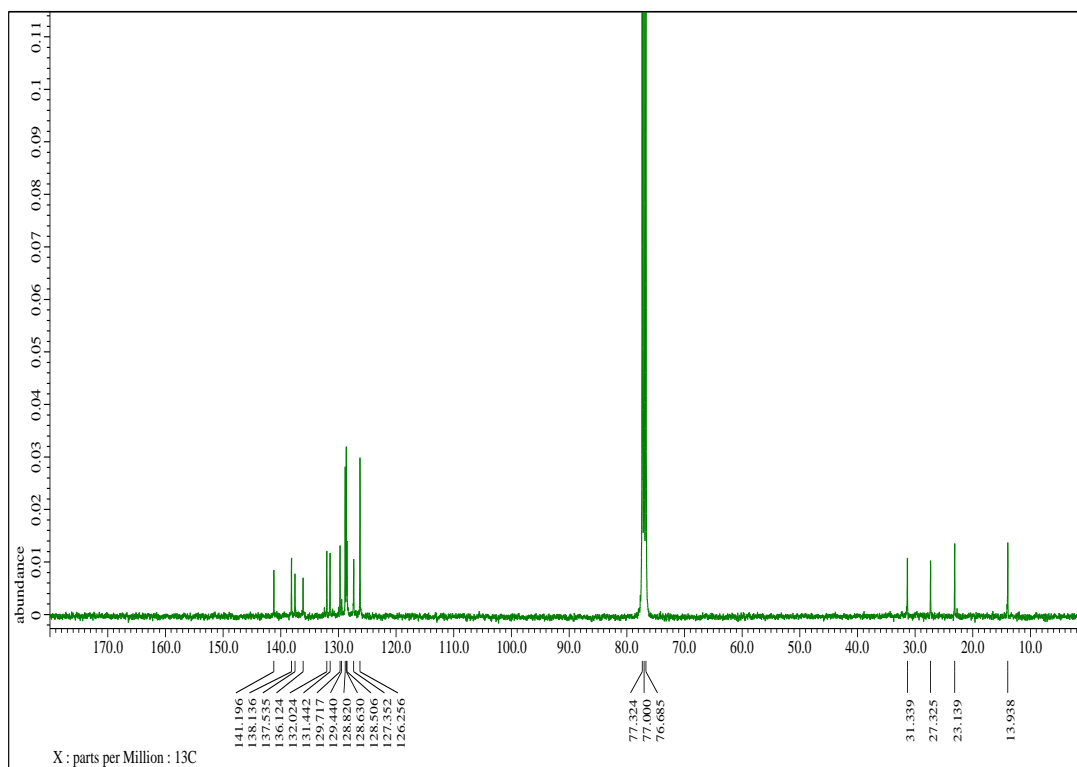

Figure S43.  $^{13}\text{C}\{^1\text{H}\}$  NMR Spectrum of 4ee in  $\text{CDCl}_3$ .

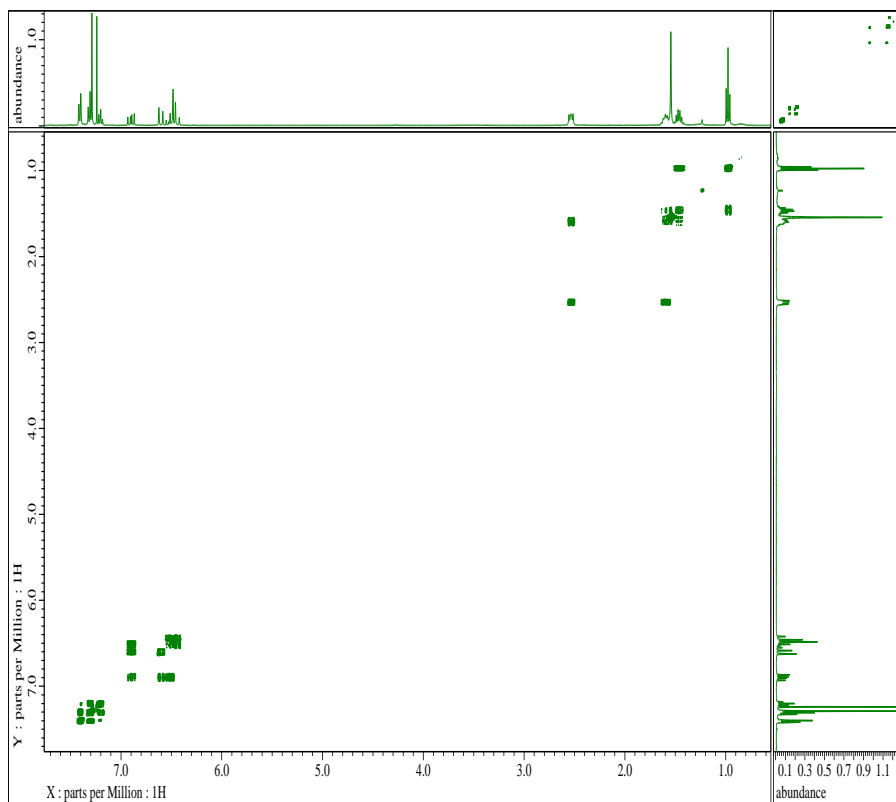

**Figure S44.**  $^1\text{H}$ - $^1\text{H}$  COSY NMR Spectrum of **4ee** in  $\text{CDCl}_3$ .

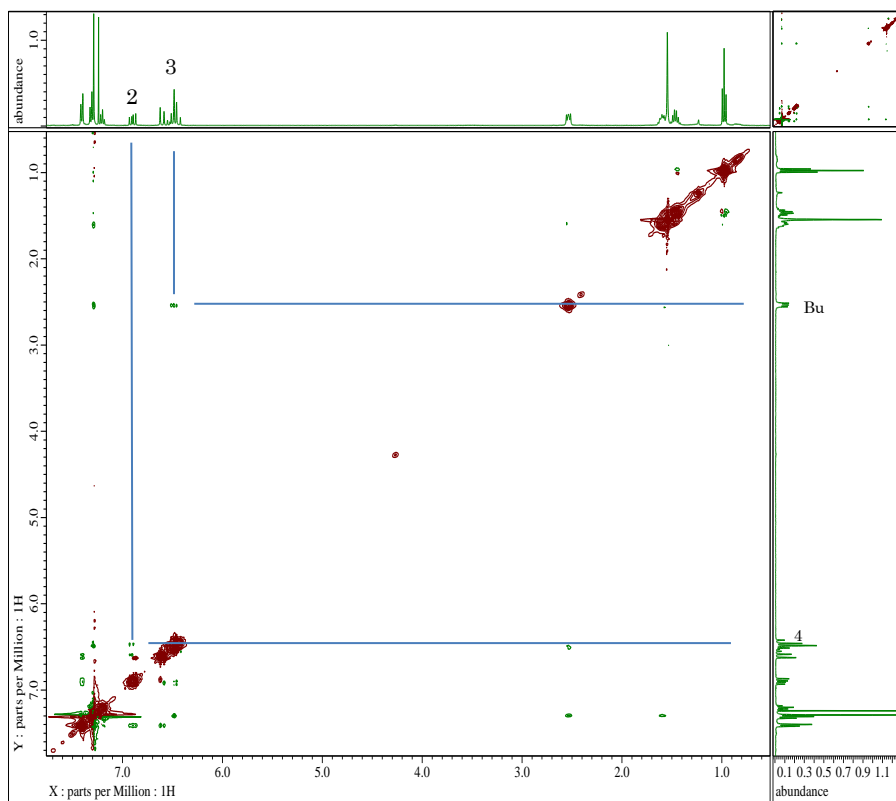

**Figure S45.**  $^1\text{H}$ - $^1\text{H}$  NOESY NMR Spectrum of **4ee** in  $\text{CDCl}_3$ .

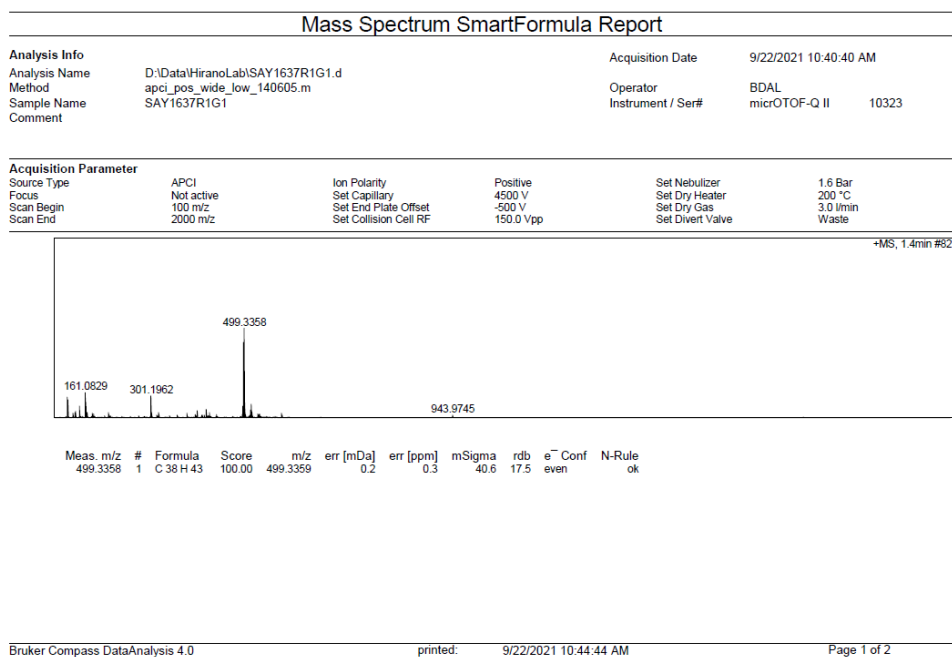

**Figure S46. HRMS (APCI) data for 4ee.**

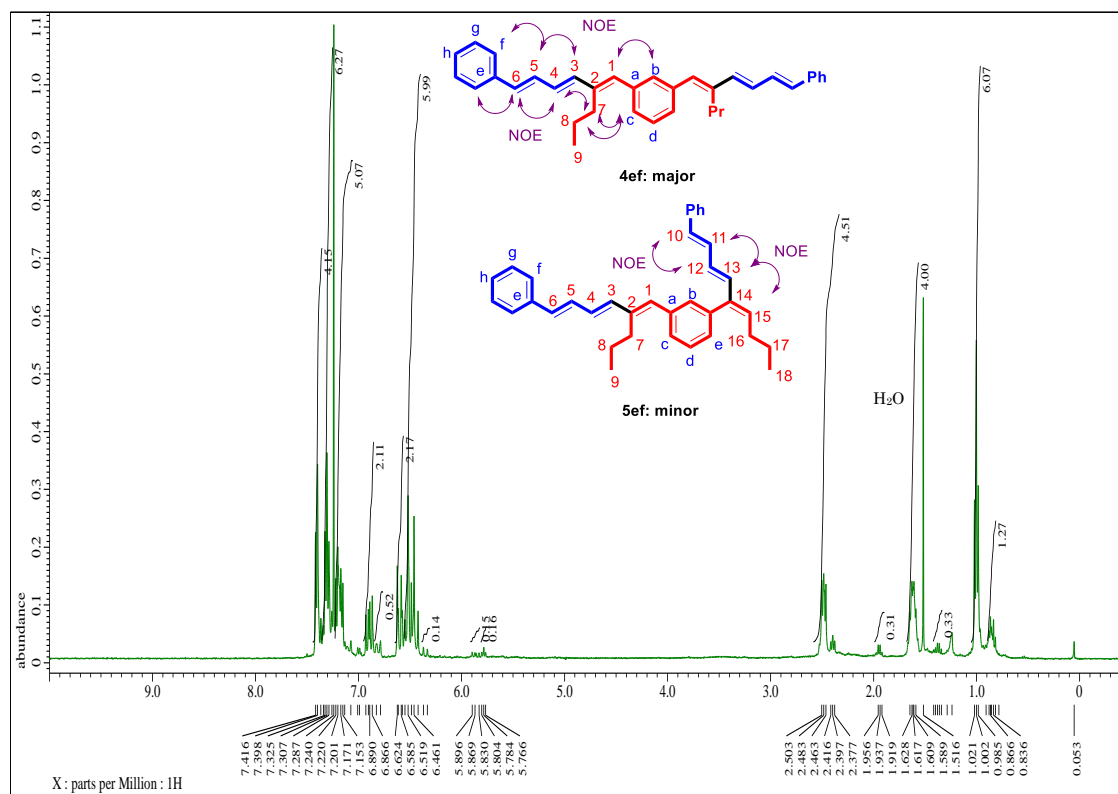

**Figure S47. <sup>1</sup>H NMR Spectrum of 4ef and 5ef in CDCl<sub>3</sub>.**

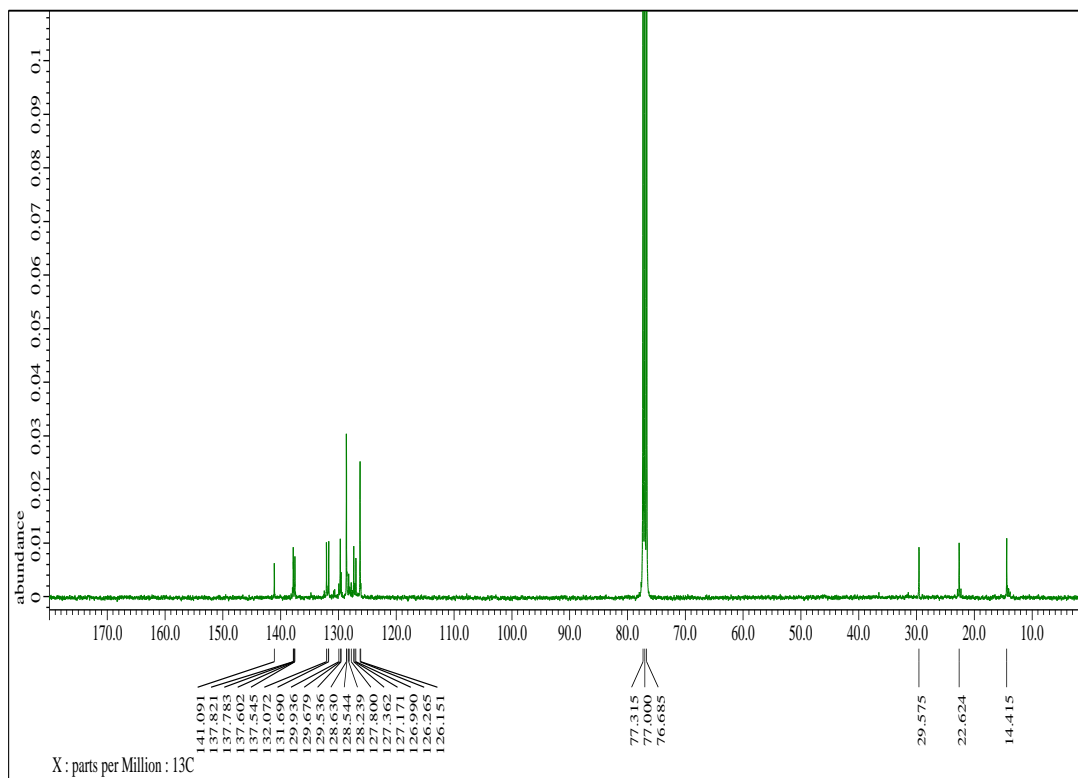

**Figure S48.**  $^{13}\text{C}\{^1\text{H}\}$  NMR Spectrum of 4ef (included 5ef) in  $\text{CDCl}_3$ .

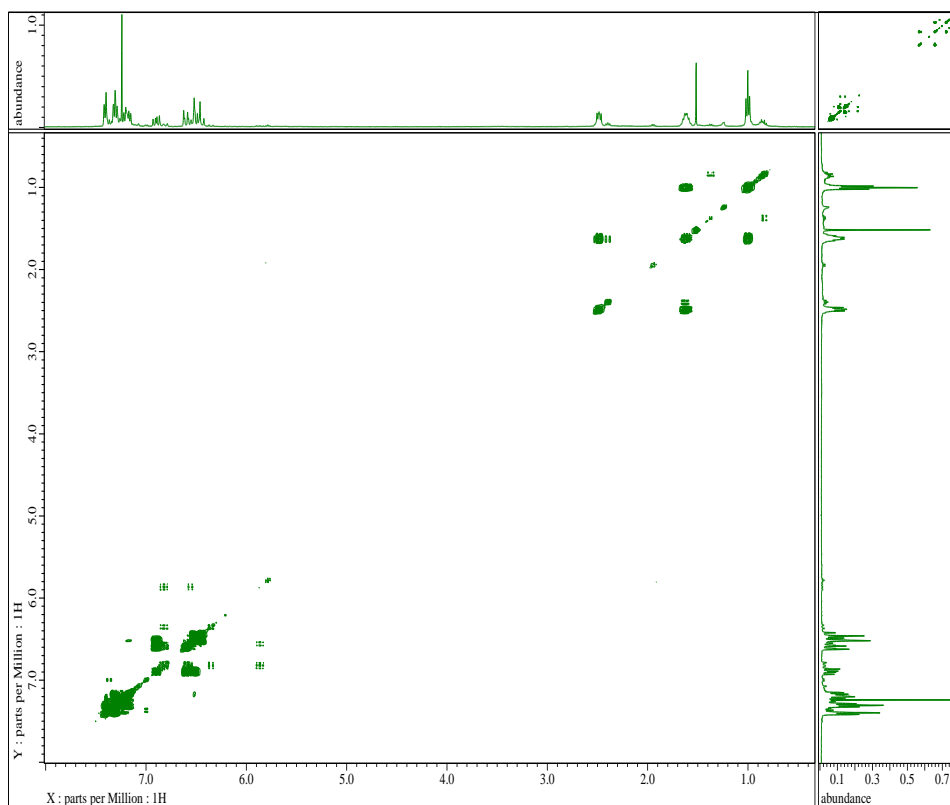

**Figure S49.**  $^1\text{H}$ - $^1\text{H}$  COSY NMR Spectrum of 4ef and 5ef in  $\text{CDCl}_3$ .

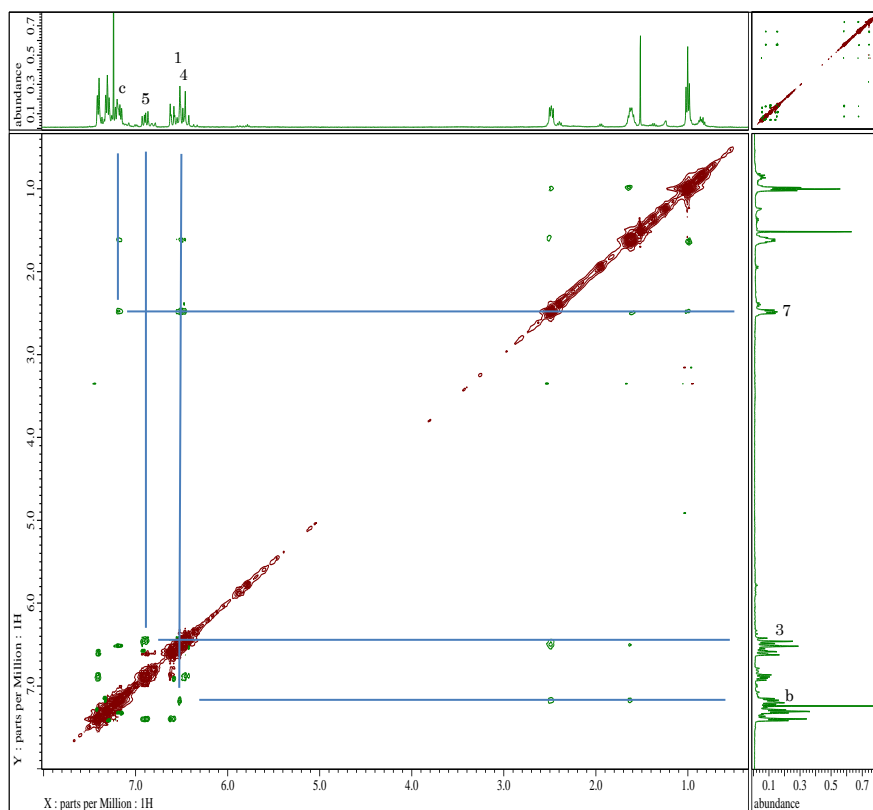

**Figure S50.**  $^1\text{H}$ - $^1\text{H}$  NOESY NMR Spectrum of 4ef and 5ef in  $\text{CDCl}_3$ .

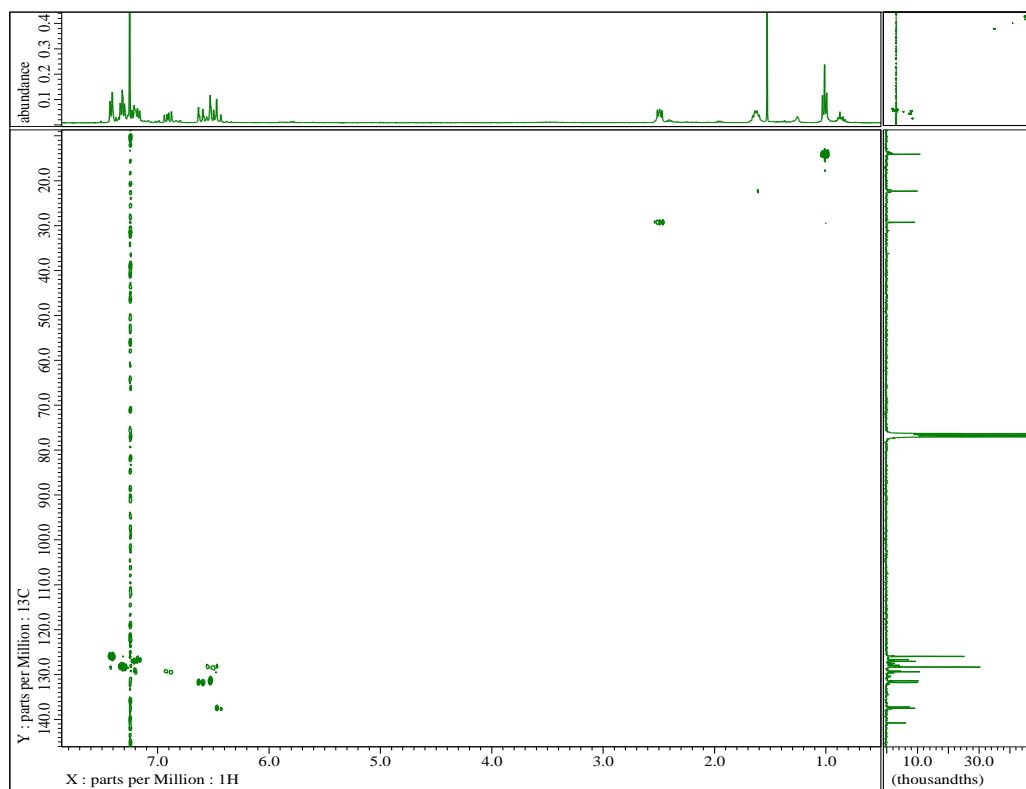

**Figure S51.**  $^{13}\text{C}$ - $^1\text{H}$  Correlation Spectrum of 4gf (included 5gf) in  $\text{CDCl}_3$ .

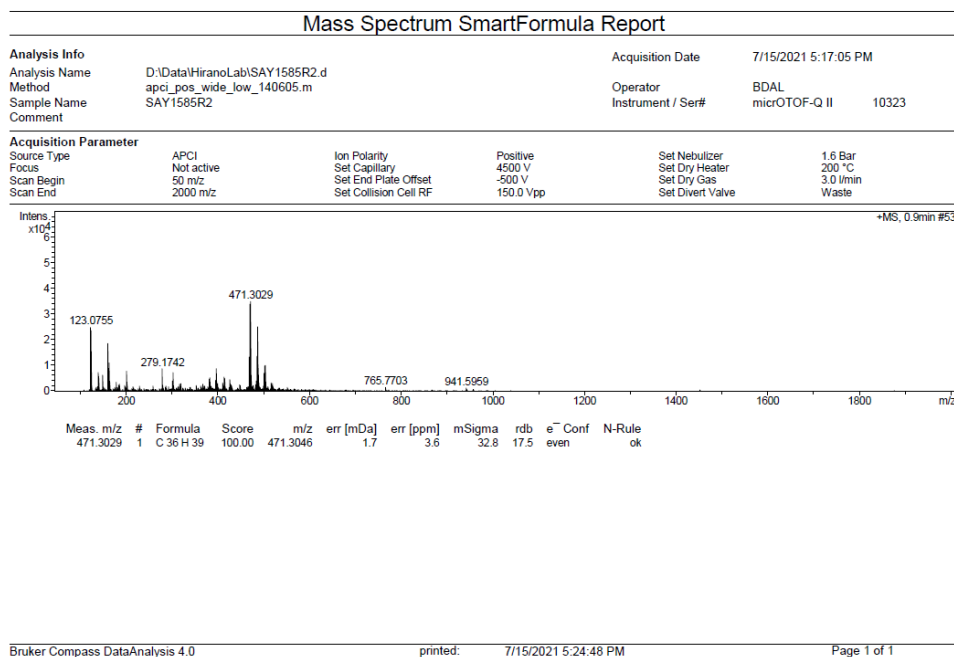

**Figure S52. HRMS (APCI) data for 4ef and 5ef.**

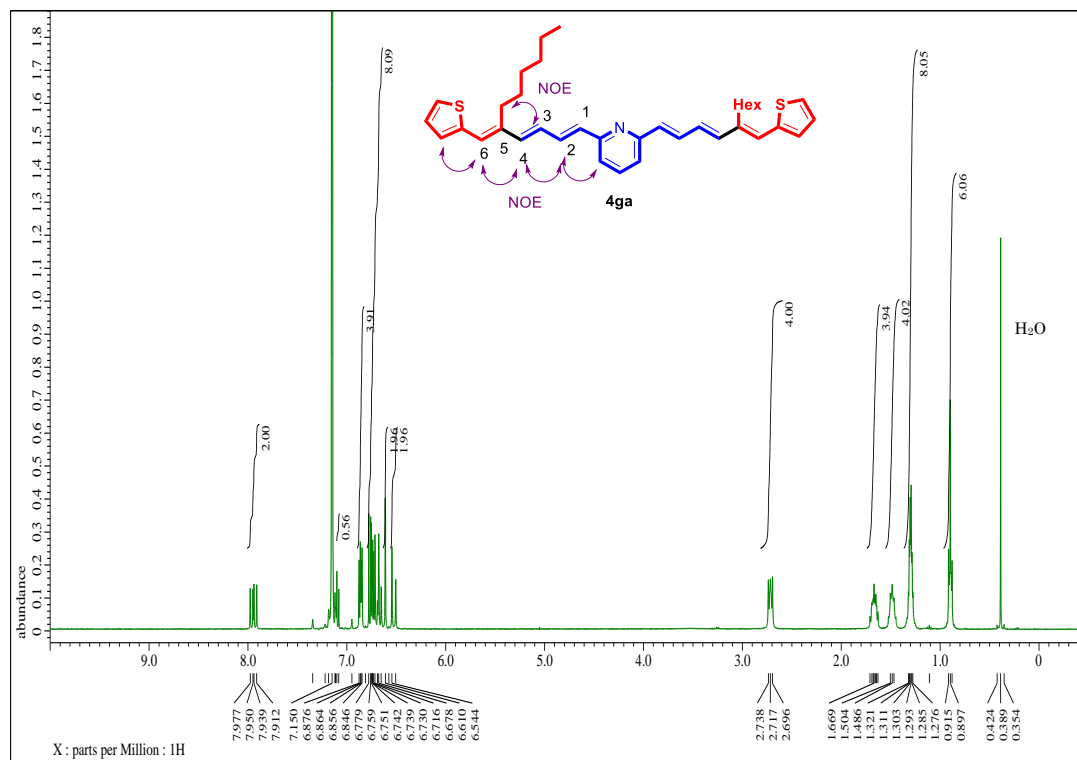

**Figure S53. <sup>1</sup>H NMR Spectrum of 4ga in C<sub>6</sub>D<sub>6</sub>.**

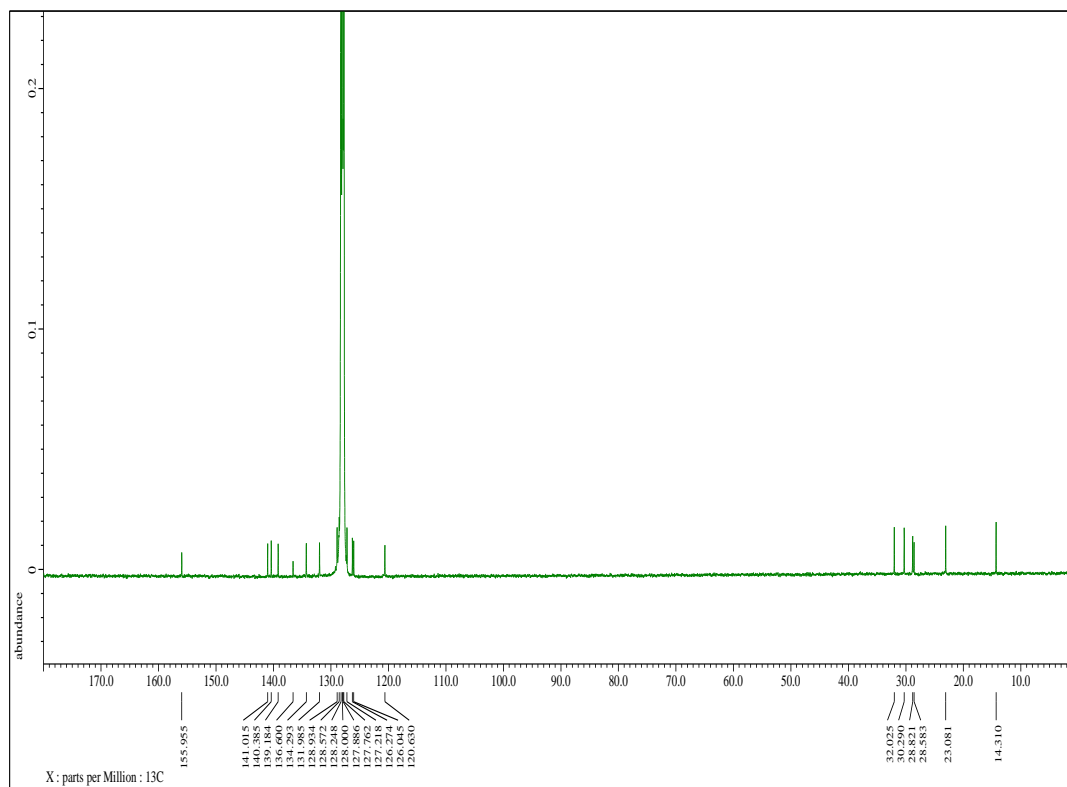

**Figure S54.**  $^{13}\text{C}\{^1\text{H}\}$  NMR Spectrum of 4ga in  $\text{C}_6\text{D}_6$ .

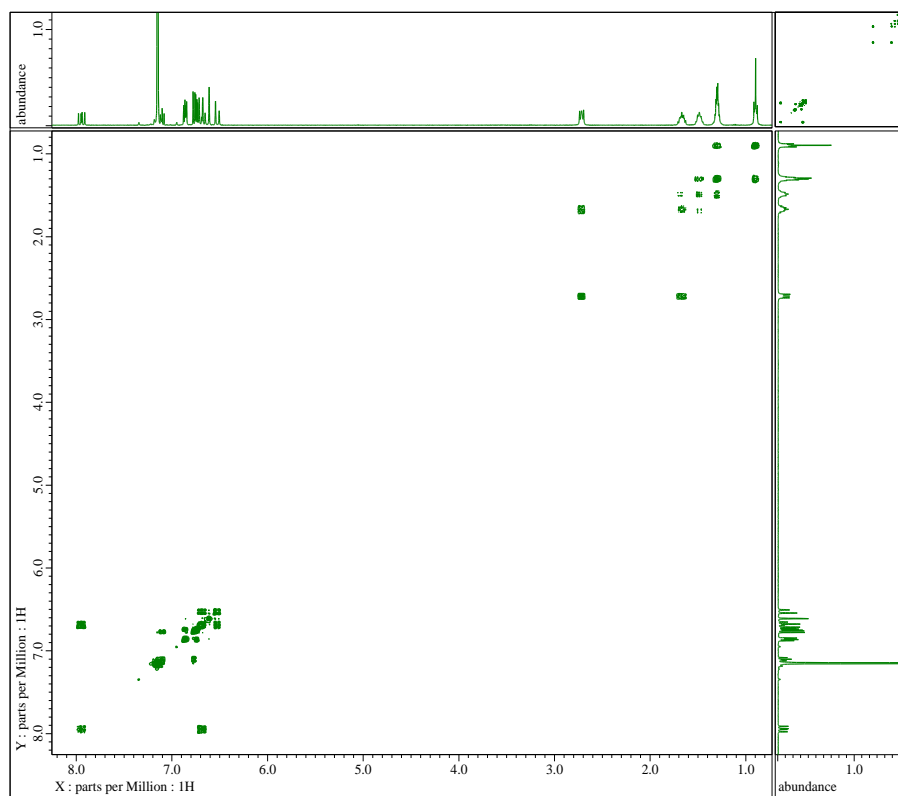

**Figure S55.**  $^1\text{H}-^1\text{H}$  COSY NMR Spectrum of 4ga in  $\text{C}_6\text{D}_6$ .



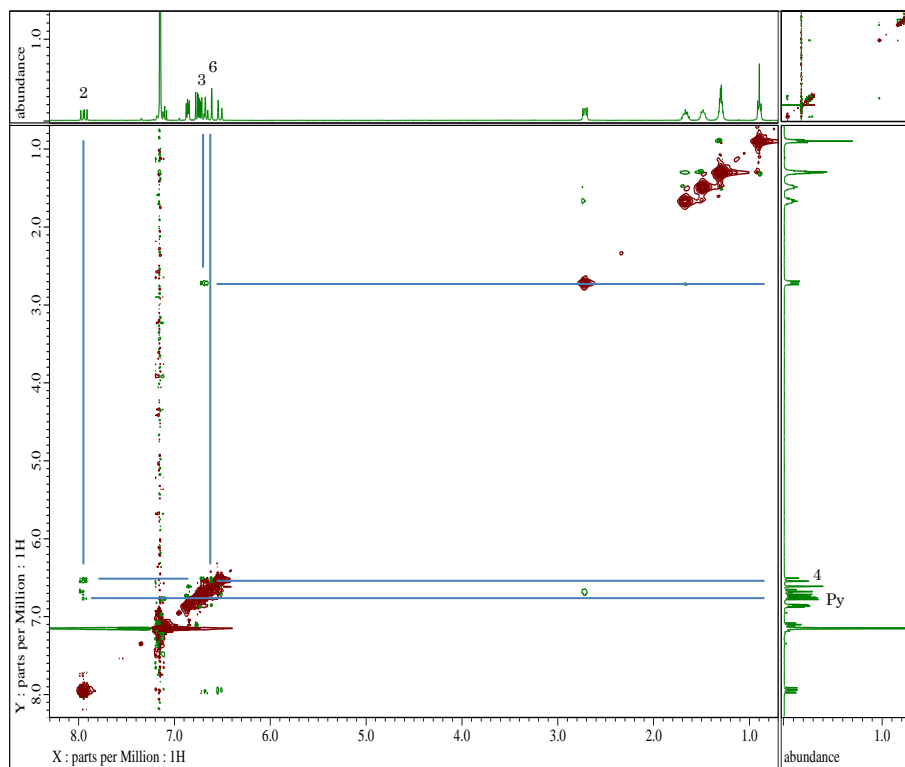

Figure S56.  $^1\text{H}$ - $^1\text{H}$  pNOESY NMR Spectrum of 4ga in  $\text{C}_6\text{D}_6$ .

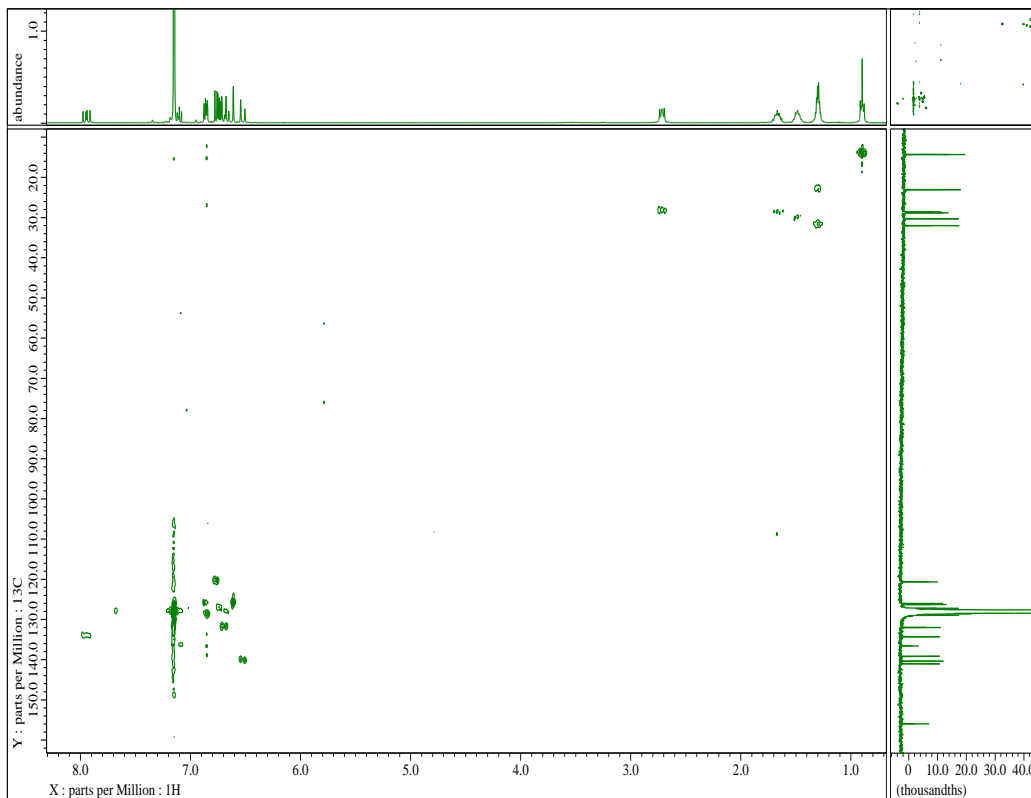

Figure S57.  $^{13}\text{C}$ - $^1\text{H}$  Correlation Spectrum of 4ga in  $\text{C}_6\text{D}_6$ .

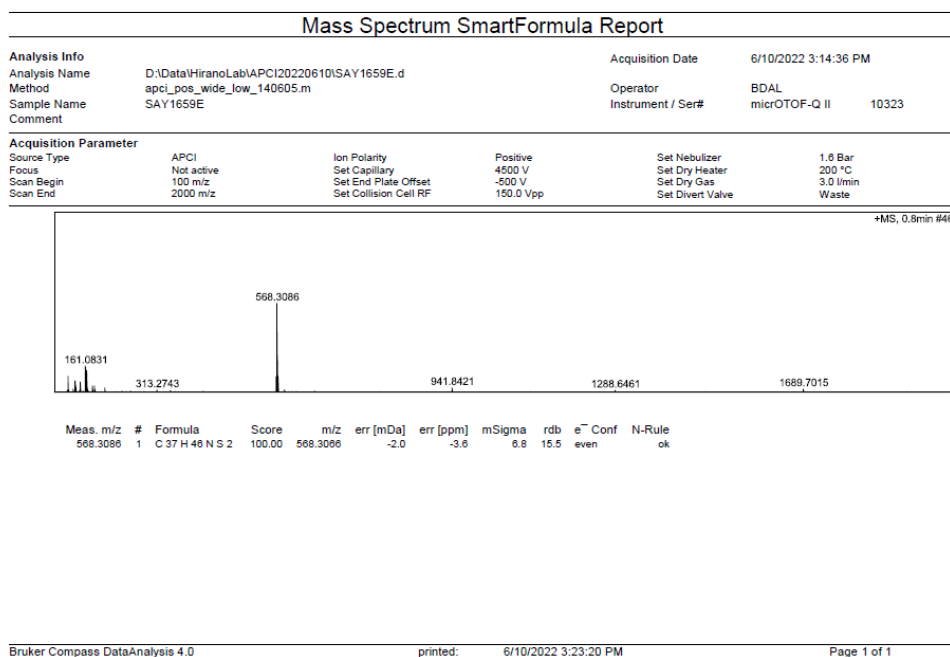

**Figure S58. HRMS (APCI) data for 4ga.**

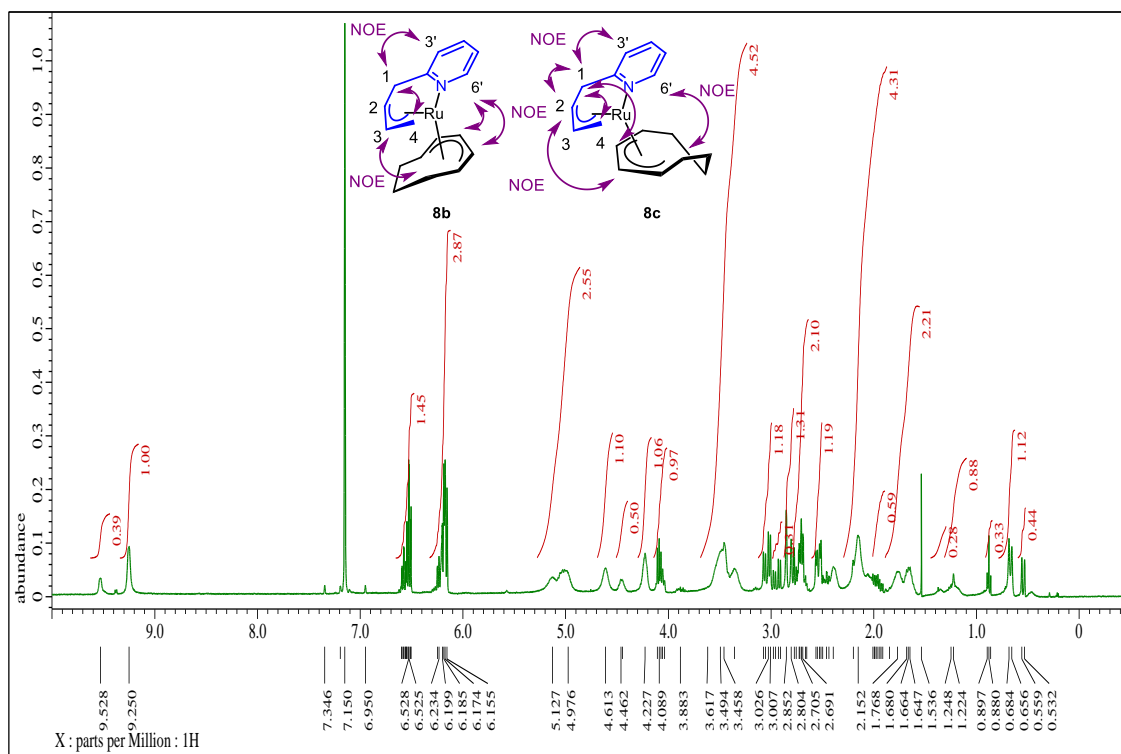

**Figure S59. <sup>1</sup>H NMR Spectrum of 8b and 8c in C<sub>6</sub>D<sub>6</sub>.**

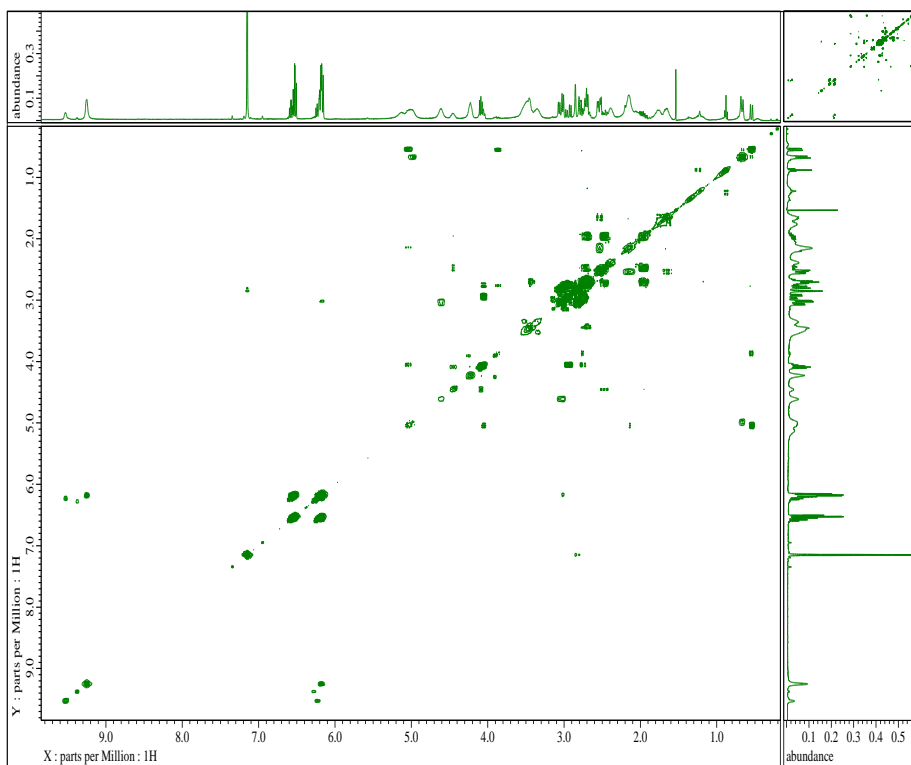

Figure S60.  $^1\text{H}$ - $^1\text{H}$  COSY NMR Spectrum of 8b and 8c in  $\text{C}_6\text{D}_6$ .

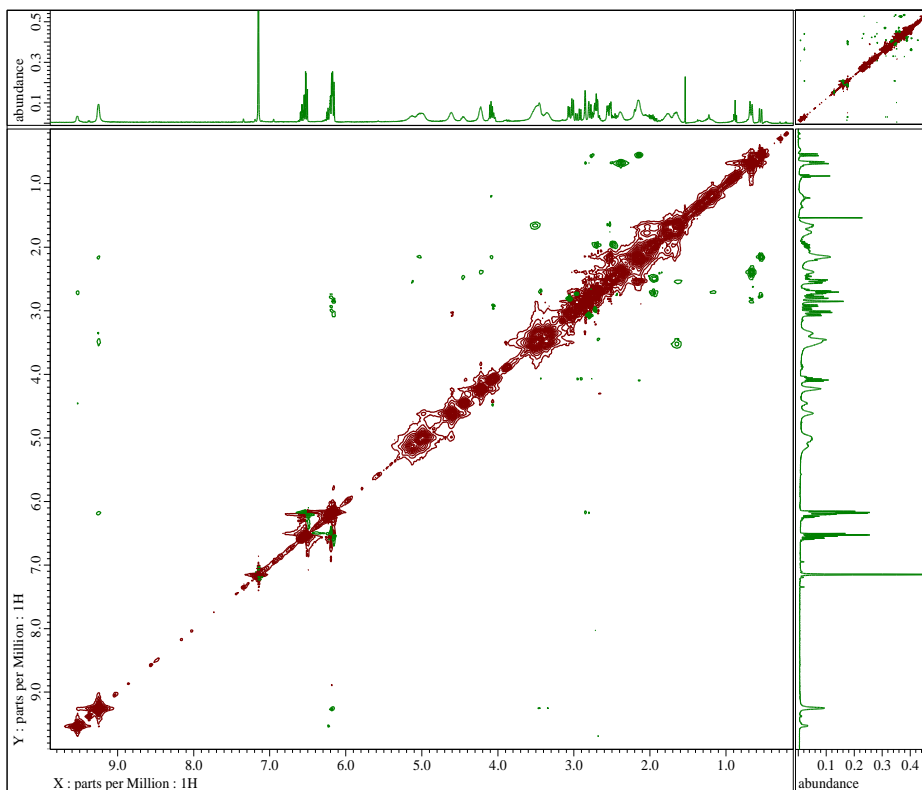

Figure S61.  $^1\text{H}$ - $^1\text{H}$  NOESY NMR Spectrum of 8b and 8c in  $\text{C}_6\text{D}_6$ .



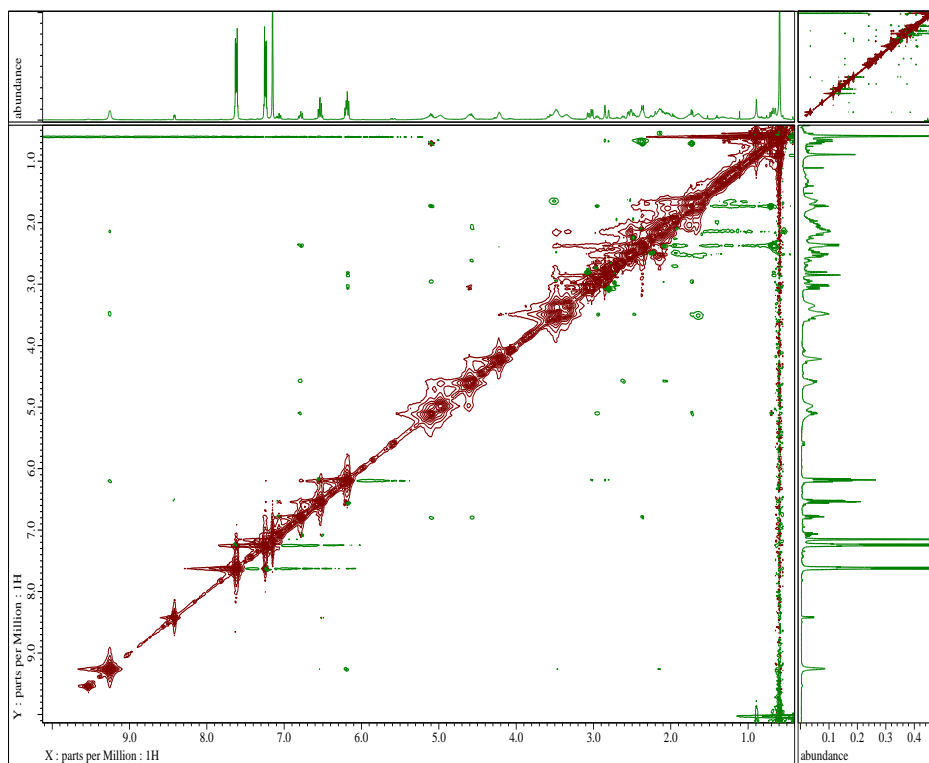

Figure S64.  $^1\text{H}$ - $^1\text{H}$  NOESY NMR Spectrum of Stoichiometric Reaction (7 and 8b in  $\text{C}_6\text{D}_6$ ).

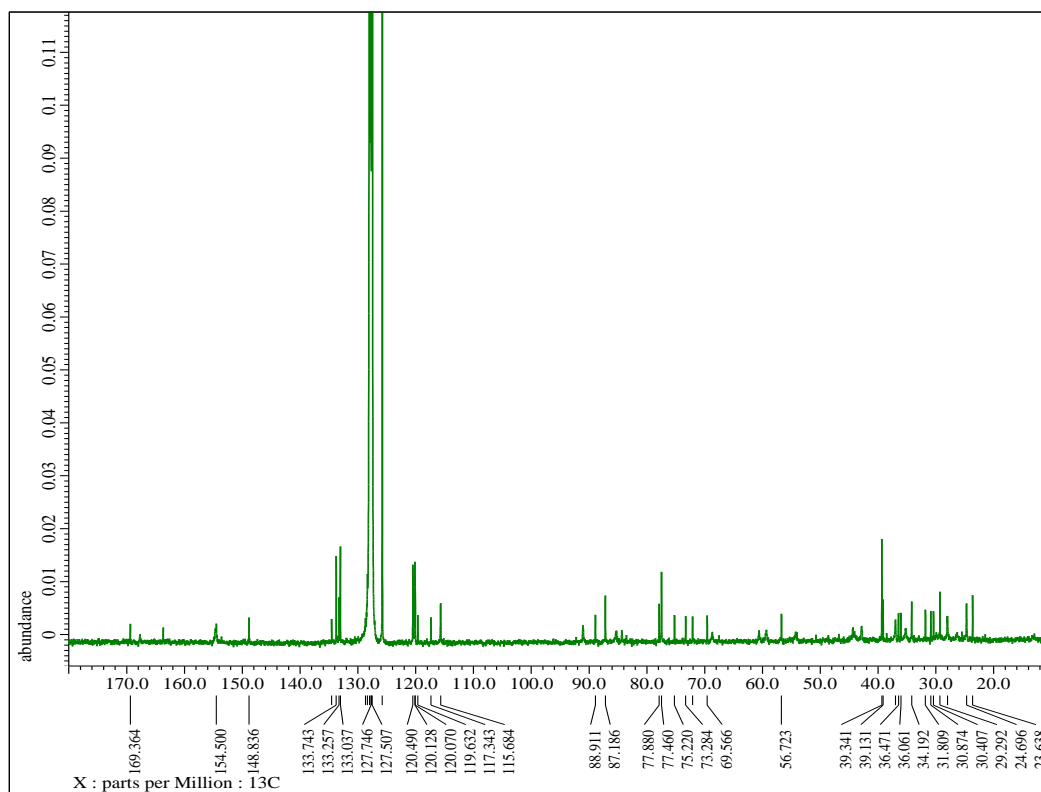

Figure S65.  $^{13}\text{C}\{^1\text{H}\}$  NMR Spectrum of Stoichiometric Reaction (7, 8b and 8c in  $\text{C}_6\text{D}_6$ ).

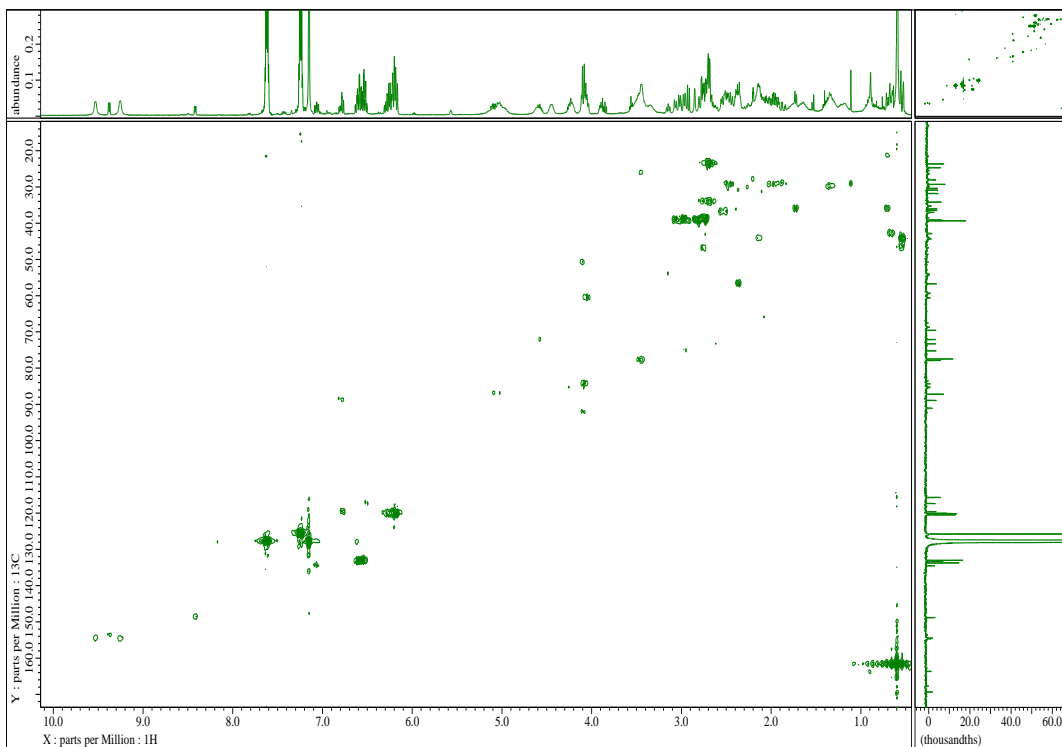

Figure S66.  $^{13}\text{C}$ - $^1\text{H}$  Correlation Spectrum of Stoichiometric Reaction (7, 8b and 8c in  $\text{C}_6\text{D}_6$ ).

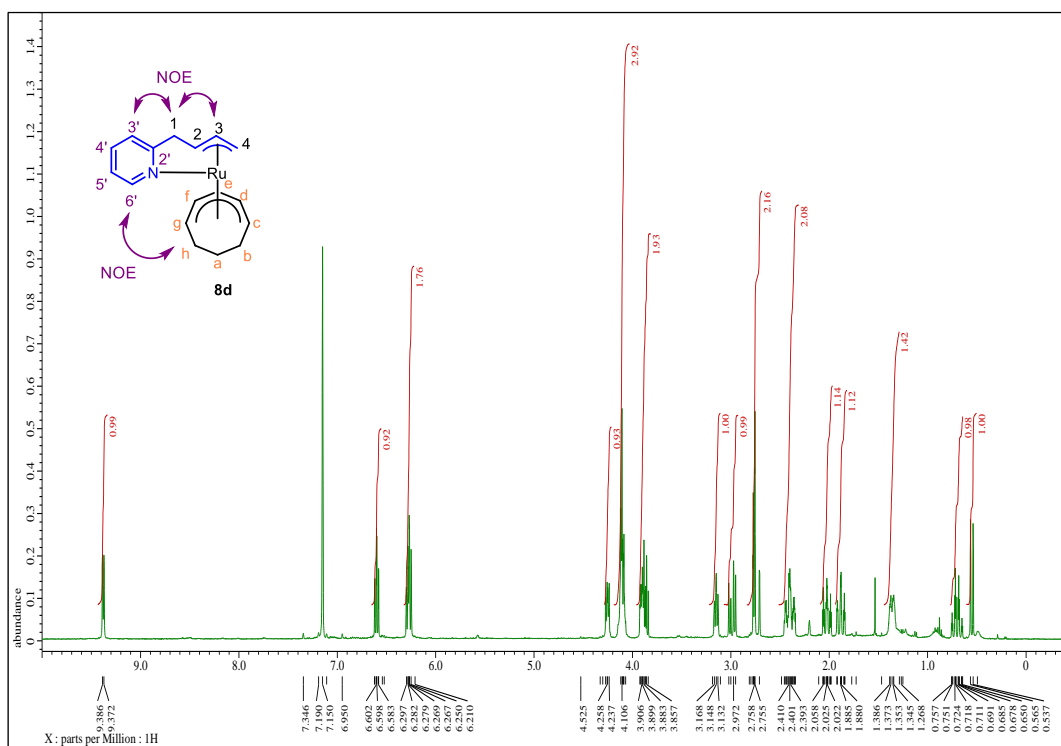

Figure S67.  $^1\text{H}$  NMR Spectrum of **8d** in  $\text{C}_6\text{D}_6$ .

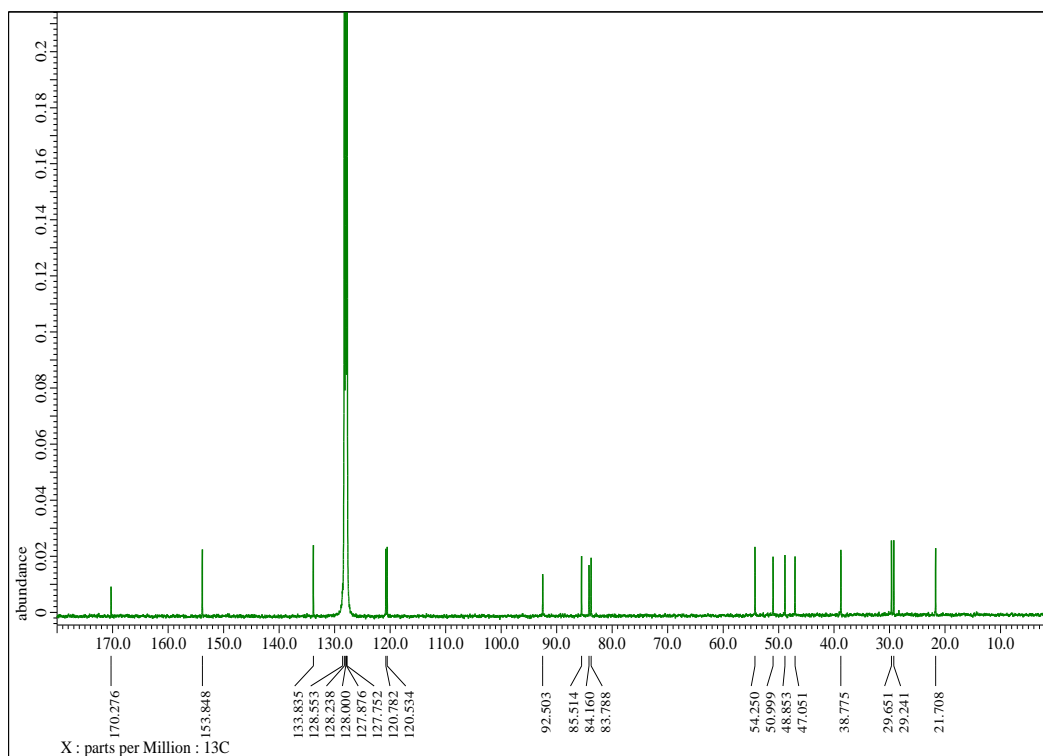

**Figure S68.**  $^{13}\text{C}\{^1\text{H}\}$  NMR Spectrum of **8d** in  $\text{C}_6\text{D}_6$ .

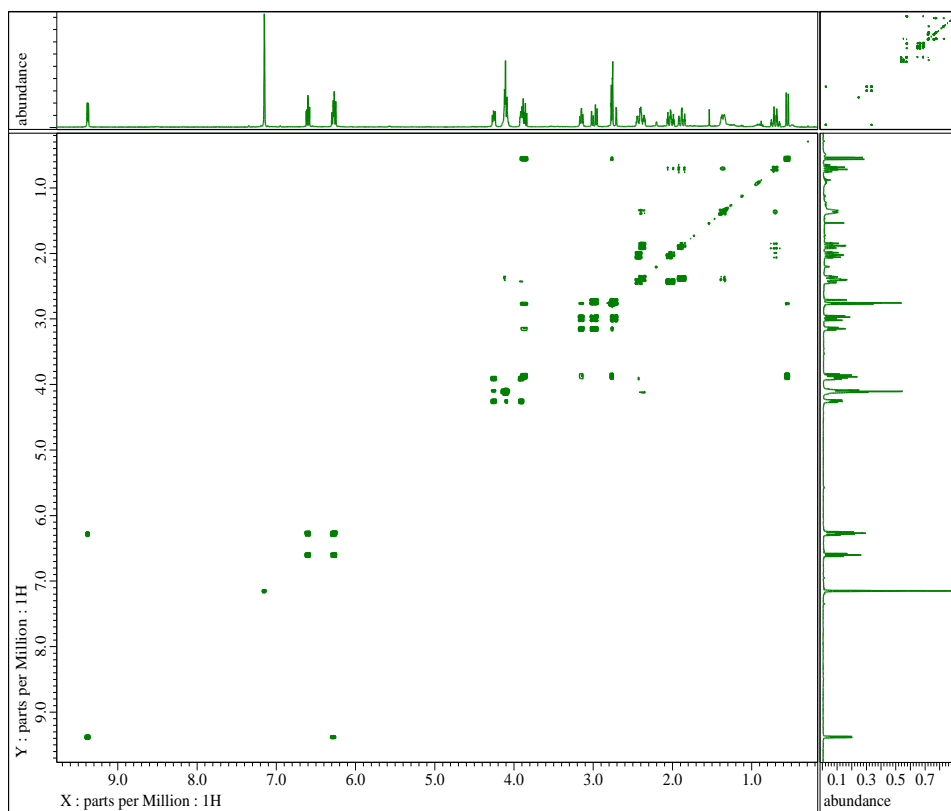

**Figure S69.**  $^1\text{H}$ - $^1\text{H}$  COSY NMR Spectrum of **8d** in  $\text{C}_6\text{D}_6$ .

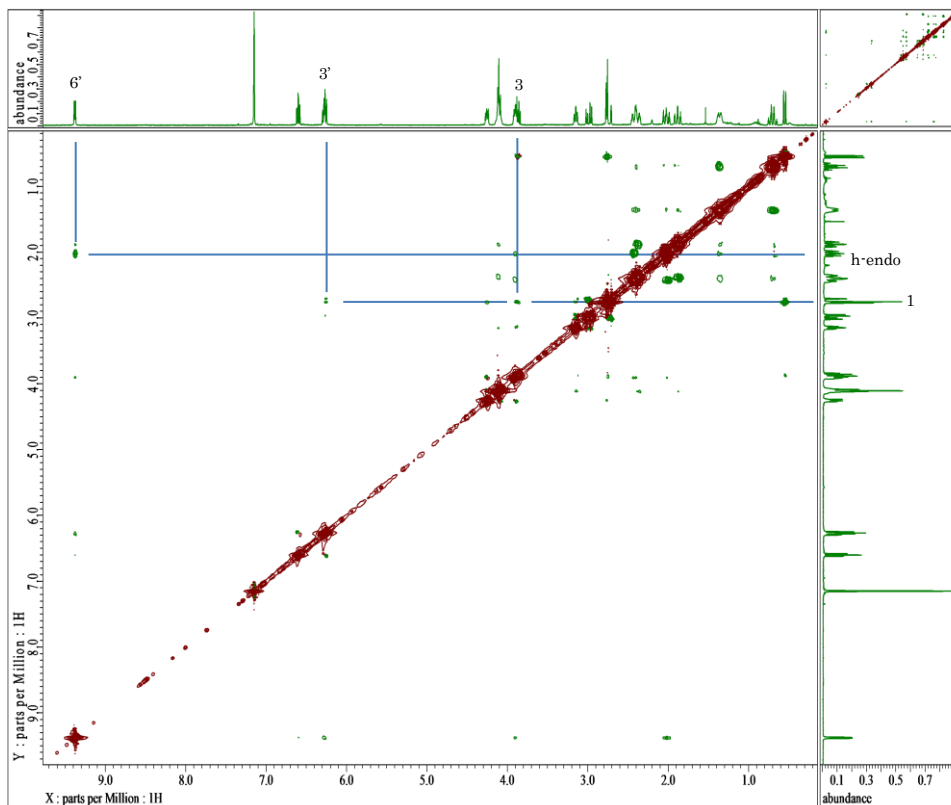

Figure S70.  $^1\text{H}$ - $^1\text{H}$  pNOESY NMR Spectrum of 8d in  $\text{C}_6\text{D}_6$ .

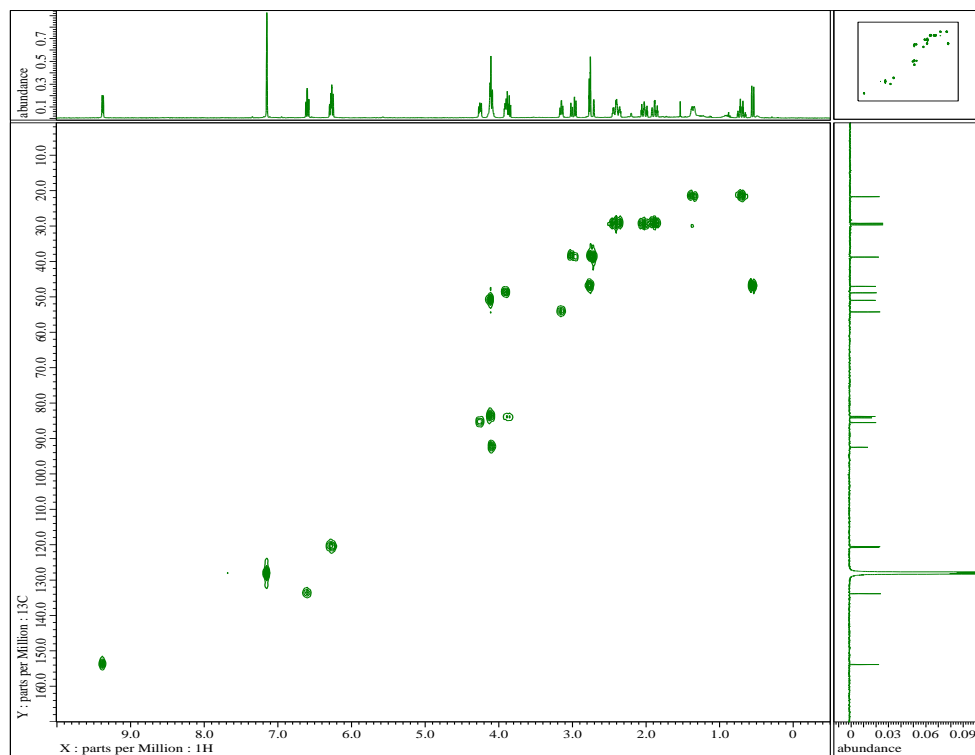

Figure S71.  $^{13}\text{C}$ - $^1\text{H}$  Correlation Spectrum of 8d in  $\text{C}_6\text{D}_6$ .



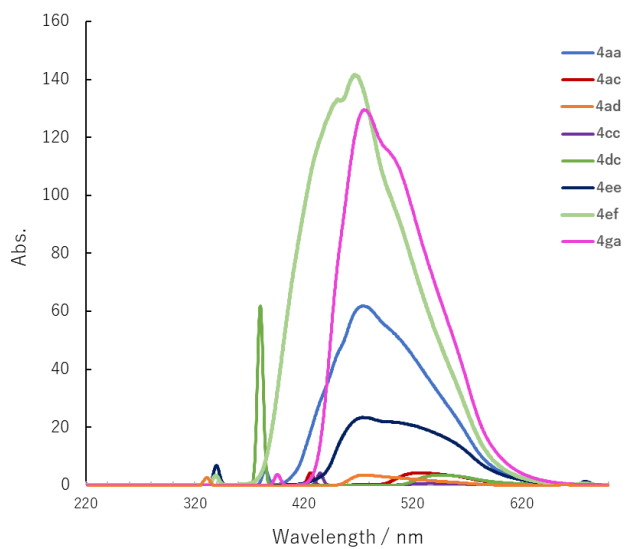

**Figure S72. Fluorescence emission (0.1 mM) spectra of compounds 4 in MeCN at r.t.. Since excitation spectra were not observed, fluorescence emission spectra measured at the excitation wavelength that fluorescence intensity was maximized. Excitation wavelength: 4aa (384.5 nm), 4ac (426.5 nm), 4ad (330 nm), 4cc (435 nm), 4dc (380 nm), 4ee (340 nm), 4ef (339 nm), 4ga (395.5 nm).**

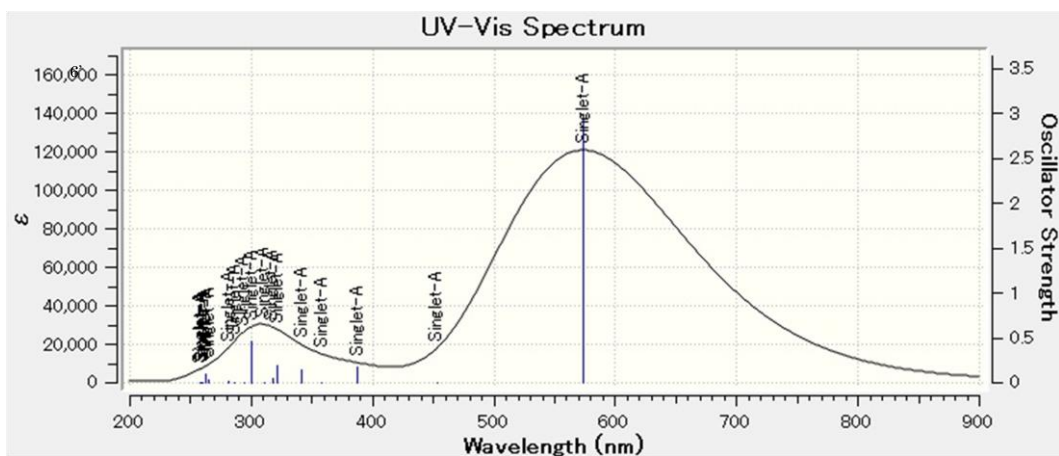

Figure S73. Calculated UV-Vis spectrum of isomer A of 4ac in acetonitrile by TD-DFT.

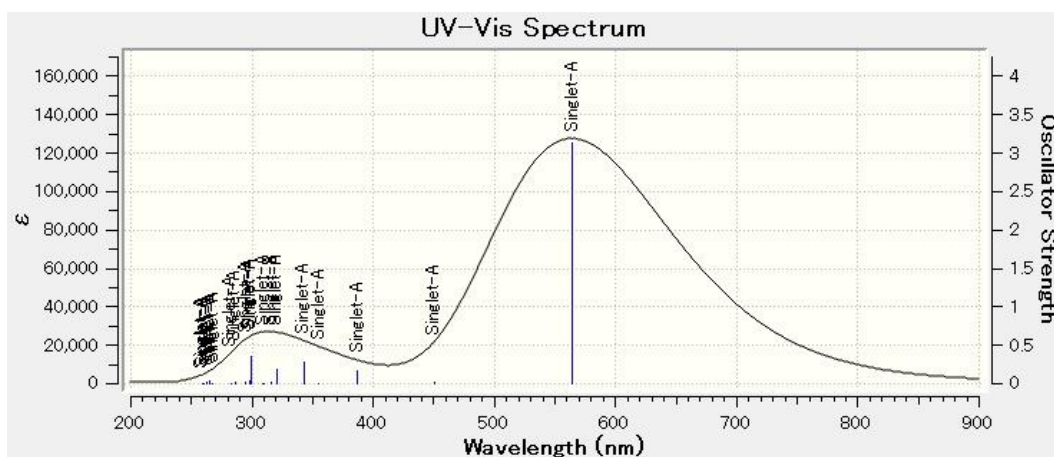

Figure S74. Calculated UV-Vis spectrum of isomer B of 4ac in acetonitrile by TD-DFT.

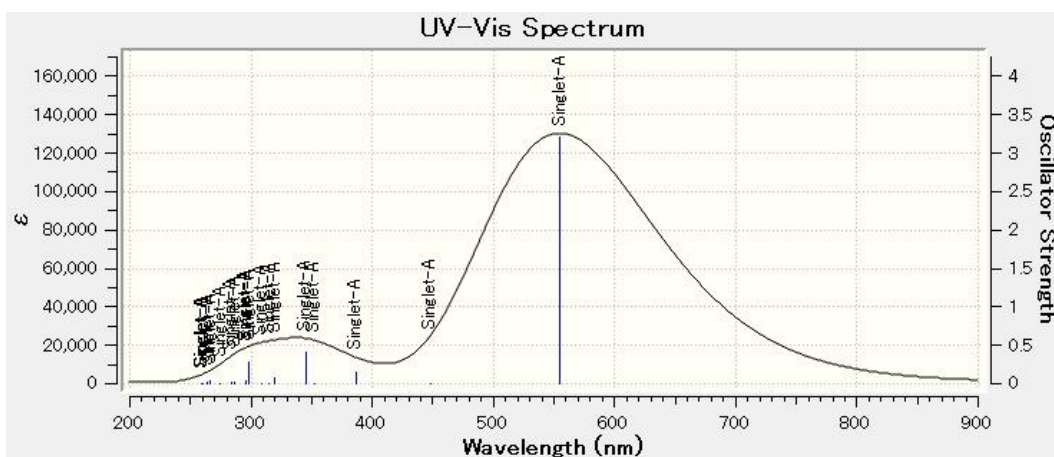

Figure S75. Calculated UV-Vis spectrum of isomer C of 4ac in acetonitrile by TD-DFT.

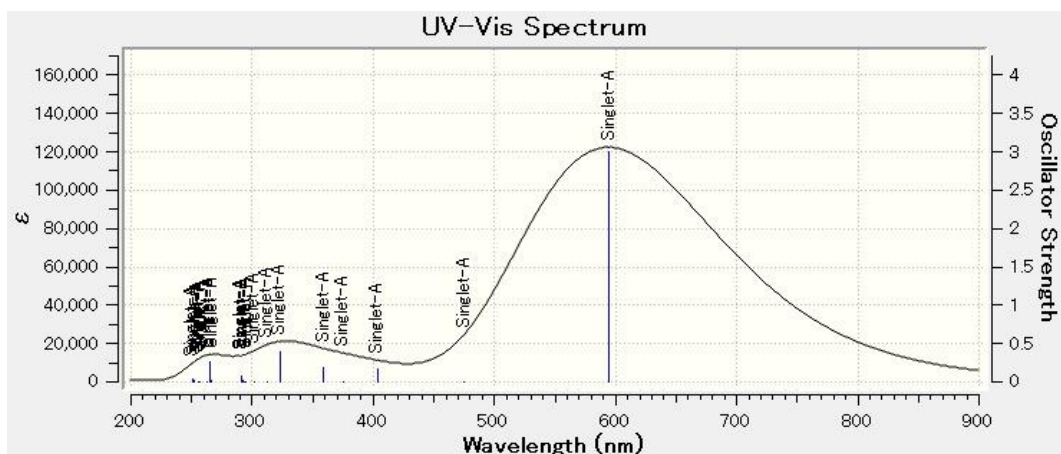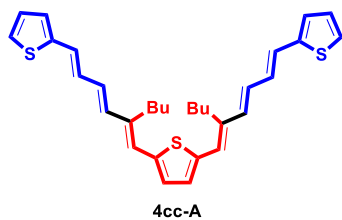

Figure S76. Calculated UV-Vis spectrum of 4cc-A in acetonitrile by TD-DFT.

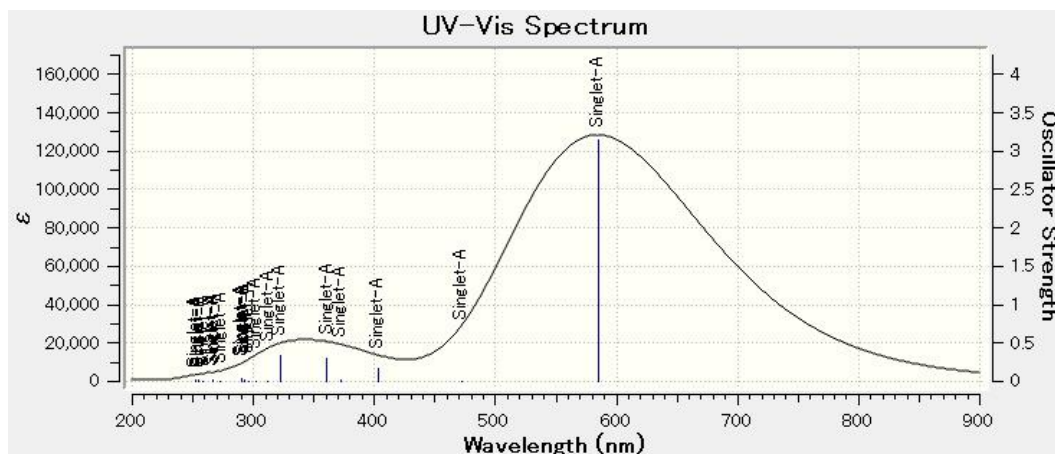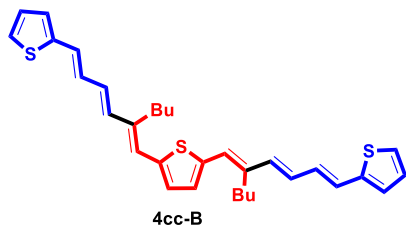

Figure S77. Calculated UV-Vis spectrum of 4cc-B in acetonitrile by TD-DFT.

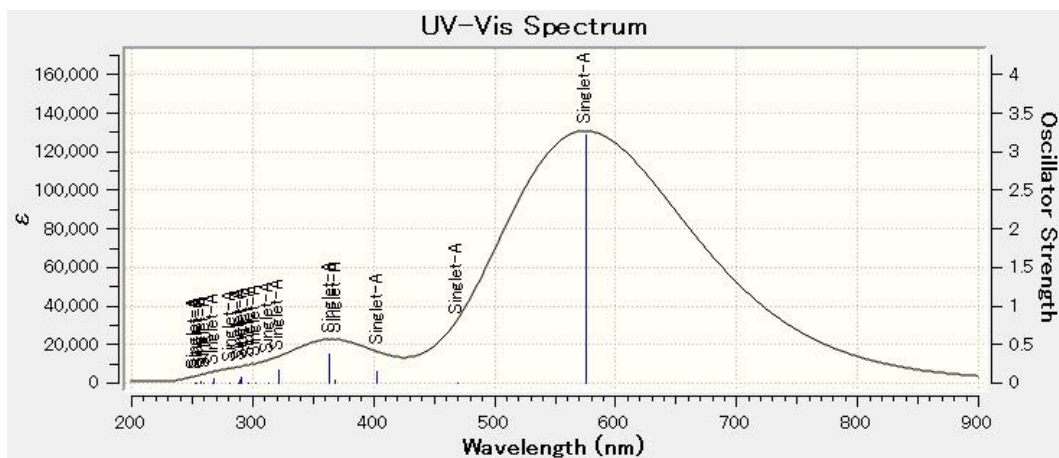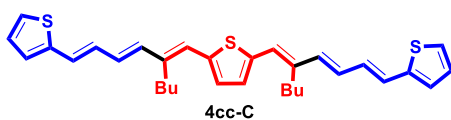

Figure S78. Calculated UV-Vis spectrum of 4cc-C in acetonitrile by TD-DFT.

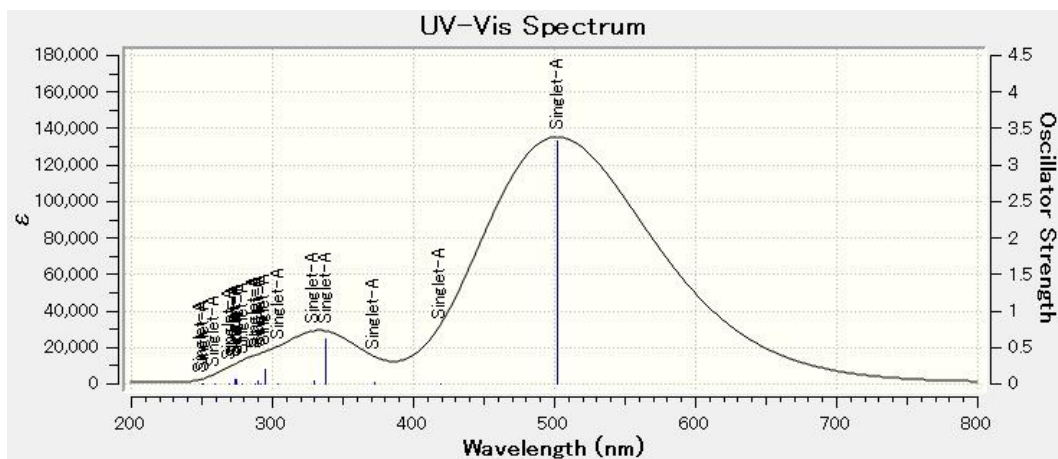

Figure S79. Calculated UV-Vis spectrum of 4ee in acetonitrile by TD-DFT.

**Table S1. TD-DFT results for 4ac (isomer A) in acetonitrile**

Excited State 1: Singlet-A 2.1607 eV 573.81 nm f=2.9724 <S\*\*2>=0.000  
136 ->137 0.70749

This state for optimization and/or second-order correction.

Total Energy, E(TD-HF/TD-DFT) = -1826.05223894

Copying the excited state density for this state as the 1-particle RhoCI density.

Excited State 2: Singlet-A 2.7373 eV 452.94 nm f=0.0004 <S\*\*2>=0.000  
135 ->137 -0.47037  
136 ->138 0.52008

Excited State 3: Singlet-A 3.1970 eV 387.82 nm f=0.1745 <S\*\*2>=0.000  
135 ->137 0.52151  
136 ->138 0.47139

Excited State 4: Singlet-A 3.4585 eV 358.49 nm f=0.0002 <S\*\*2>=0.000  
134 ->137 -0.42764  
136 ->139 0.55379

Excited State 5: Singlet-A 3.6297 eV 341.58 nm f=0.1510 <S\*\*2>=0.000  
134 ->137 0.31677  
135 ->138 0.56943  
136 ->139 0.26579

Excited State 6: Singlet-A 3.8568 eV 321.47 nm f=0.1887 <S\*\*2>=0.000  
134 ->137 -0.33867  
135 ->138 0.31718  
135 ->140 -0.11994  
136 ->139 -0.27486  
136 ->141 0.42827

Excited State 7: Singlet-A 3.9073 eV 317.31 nm f=0.0464 <S\*\*2>=0.000  
131 ->137 -0.13918  
135 ->141 -0.10222  
136 ->140 0.67143

**Table S1. continued.**

|               |           |           |           |           |          |              |
|---------------|-----------|-----------|-----------|-----------|----------|--------------|
| Excited State | 8:        | Singlet-A | 3.9967 eV | 310.22 nm | f=0.0001 | <S**2>=0.000 |
|               | 132 ->137 | 0.13606   |           |           |          |              |
|               | 132 ->138 | 0.26681   |           |           |          |              |
|               | 133 ->137 | 0.61570   |           |           |          |              |
|               | 133 ->139 | -0.12385  |           |           |          |              |
| Excited State | 9:        | Singlet-A | 3.9968 eV | 310.21 nm | f=0.0012 | <S**2>=0.000 |
|               | 132 ->137 | 0.62022   |           |           |          |              |
|               | 132 ->139 | -0.12500  |           |           |          |              |
|               | 133 ->137 | -0.13479  |           |           |          |              |
|               | 133 ->138 | 0.26452   |           |           |          |              |
| Excited State | 10:       | Singlet-A | 4.1245 eV | 300.60 nm | f=0.4571 | <S**2>=0.000 |
|               | 134 ->137 | 0.30784   |           |           |          |              |
|               | 135 ->138 | -0.25608  |           |           |          |              |
|               | 136 ->139 | 0.19057   |           |           |          |              |
|               | 136 ->141 | 0.54357   |           |           |          |              |
| Excited State | 11:       | Singlet-A | 4.1289 eV | 300.29 nm | f=0.0322 | <S**2>=0.000 |
|               | 131 ->137 | 0.61550   |           |           |          |              |
|               | 136 ->140 | 0.11831   |           |           |          |              |
|               | 136 ->142 | -0.28692  |           |           |          |              |
| Excited State | 12:       | Singlet-A | 4.2209 eV | 293.74 nm | f=0.0019 | <S**2>=0.000 |
|               | 130 ->137 | 0.58107   |           |           |          |              |
|               | 134 ->138 | -0.16012  |           |           |          |              |
|               | 135 ->139 | 0.27875   |           |           |          |              |
|               | 136 ->142 | 0.19982   |           |           |          |              |
| Excited State | 13:       | Singlet-A | 4.3293 eV | 286.39 nm | f=0.0002 | <S**2>=0.000 |
|               | 130 ->137 | -0.24557  |           |           |          |              |
|               | 134 ->138 | -0.19135  |           |           |          |              |
|               | 135 ->139 | 0.56932   |           |           |          |              |

**Table S1. continued.**

|                   |           |           |           |          |              |  |
|-------------------|-----------|-----------|-----------|----------|--------------|--|
| 136 ->142         | -0.23125  |           |           |          |              |  |
| Excited State 14: | Singlet-A | 4.4058 eV | 281.41 nm | f=0.0151 | <S**2>=0.000 |  |
| 130 ->137         | 0.19631   |           |           |          |              |  |
| 131 ->137         | -0.12558  |           |           |          |              |  |
| 134 ->138         | 0.57951   |           |           |          |              |  |
| 135 ->139         | 0.14953   |           |           |          |              |  |
| 136 ->142         | -0.25684  |           |           |          |              |  |
| Excited State 15: | Singlet-A | 4.6792 eV | 264.97 nm | f=0.0312 | <S**2>=0.000 |  |
| 127 ->137         | -0.13786  |           |           |          |              |  |
| 128 ->138         | -0.10369  |           |           |          |              |  |
| 129 ->137         | -0.22043  |           |           |          |              |  |
| 134 ->141         | 0.11005   |           |           |          |              |  |
| 135 ->140         | 0.59625   |           |           |          |              |  |
| 136 ->141         | 0.11799   |           |           |          |              |  |
| Excited State 16: | Singlet-A | 4.7147 eV | 262.97 nm | f=0.0958 | <S**2>=0.000 |  |
| 128 ->137         | 0.24415   |           |           |          |              |  |
| 130 ->137         | 0.12588   |           |           |          |              |  |
| 131 ->137         | -0.16402  |           |           |          |              |  |
| 134 ->138         | -0.11935  |           |           |          |              |  |
| 134 ->140         | 0.11734   |           |           |          |              |  |
| 135 ->141         | 0.41971   |           |           |          |              |  |
| 136 ->142         | -0.39336  |           |           |          |              |  |
| Excited State 17: | Singlet-A | 4.7625 eV | 260.33 nm | f=0.0047 | <S**2>=0.000 |  |
| 127 ->137         | -0.12898  |           |           |          |              |  |
| 129 ->137         | 0.58201   |           |           |          |              |  |
| 135 ->140         | 0.23545   |           |           |          |              |  |
| 135 ->142         | 0.13970   |           |           |          |              |  |
| 136 ->143         | 0.15898   |           |           |          |              |  |
| 136 ->144         | -0.15049  |           |           |          |              |  |
| Excited State 18: | Singlet-A | 4.7866 eV | 259.02 nm | f=0.0015 | <S**2>=0.000 |  |

**Table S1. continued.**

|           |          |
|-----------|----------|
| 132 ->137 | -0.29239 |
| 132 ->138 | 0.15202  |
| 132 ->139 | -0.23710 |
| 133 ->138 | 0.54098  |
| 133 ->140 | -0.11928 |

|                   |           |           |           |          |              |
|-------------------|-----------|-----------|-----------|----------|--------------|
| Excited State 19: | Singlet-A | 4.7866 eV | 259.02 nm | f=0.0002 | <S**2>=0.000 |
| 132 ->138         | 0.54497   |           |           |          |              |
| 132 ->140         | -0.12041  |           |           |          |              |
| 133 ->137         | -0.28972  |           |           |          |              |
| 133 ->138         | -0.15067  |           |           |          |              |
| 133 ->139         | -0.23515  |           |           |          |              |

|                   |           |           |           |          |              |
|-------------------|-----------|-----------|-----------|----------|--------------|
| Excited State 20: | Singlet-A | 4.8062 eV | 257.97 nm | f=0.0004 | <S**2>=0.000 |
| 136 ->143         | 0.41903   |           |           |          |              |
| 136 ->144         | 0.55535   |           |           |          |              |

SavETr: write IOETrn= 770 NScale= 10 NData= 16 NLR=1 NState= 20 LETran=  
370.



**Table S2. TD-DFT results for 4ac (isomer B) in acetonitrile**

Excited State 1: Singlet-A 2.1967 eV 564.42 nm f=3.1338  
<S\*\*2>=0.000  
136 ->137 0.70719

This state for optimization and/or second-order correction.

Total Energy, E(TD-HF/TD-DFT) = -1826.04969518

Copying the excited state density for this state as the 1-particle RhoCI density.

Excited State 2: Singlet-A 2.7533 eV 450.31 nm f=0.0106  
<S\*\*2>=0.000  
135 ->137 0.45769  
136 ->138 0.53114

Excited State 3: Singlet-A 3.2023 eV 387.17 nm f=0.1657  
<S\*\*2>=0.000  
135 ->137 0.53328  
136 ->138 -0.45904

Excited State 4: Singlet-A 3.4889 eV 355.37 nm f=0.0063  
<S\*\*2>=0.000  
134 ->137 0.43643  
136 ->139 0.54581

Excited State 5: Singlet-A 3.6160 eV 342.88 nm f=0.2826  
<S\*\*2>=0.000  
134 ->137 0.26028  
135 ->138 0.60964  
136 ->139 -0.23460

Excited State 6: Singlet-A 3.8679 eV 320.55 nm f=0.1778  
<S\*\*2>=0.000  
134 ->137 0.37609  
135 ->138 -0.26583  
135 ->140 0.11825  
136 ->139 -0.31419

**Table S2. continued.**

|               |     |           |           |           |          |  |
|---------------|-----|-----------|-----------|-----------|----------|--|
| 136 ->141     |     | 0.40400   |           |           |          |  |
| Excited State | 7:  | Singlet-A | 3.9240 eV | 315.96 nm | f=0.0105 |  |
| <S**2>=0.000  |     |           |           |           |          |  |
| 130 ->137     |     | -0.12807  |           |           |          |  |
| 135 ->141     |     | 0.10409   |           |           |          |  |
| 136 ->140     |     | 0.67159   |           |           |          |  |
| Excited State | 8:  | Singlet-A | 4.0045 eV | 309.61 nm | f=0.0007 |  |
| <S**2>=0.000  |     |           |           |           |          |  |
| 131 ->137     |     | 0.16774   |           |           |          |  |
| 132 ->137     |     | 0.60740   |           |           |          |  |
| 132 ->138     |     | 0.27382   |           |           |          |  |
| 132 ->139     |     | -0.12420  |           |           |          |  |
| Excited State | 9:  | Singlet-A | 4.0122 eV | 309.02 nm | f=0.0007 |  |
| <S**2>=0.000  |     |           |           |           |          |  |
| 133 ->137     |     | 0.61842   |           |           |          |  |
| 133 ->138     |     | -0.28766  |           |           |          |  |
| 133 ->139     |     | -0.12833  |           |           |          |  |
| Excited State | 10: | Singlet-A | 4.1435 eV | 299.22 nm | f=0.3618 |  |
| <S**2>=0.000  |     |           |           |           |          |  |
| 131 ->137     |     | -0.10097  |           |           |          |  |
| 134 ->137     |     | -0.29989  |           |           |          |  |
| 135 ->138     |     | 0.21685   |           |           |          |  |
| 136 ->139     |     | 0.18960   |           |           |          |  |
| 136 ->141     |     | 0.55302   |           |           |          |  |
| Excited State | 11: | Singlet-A | 4.1600 eV | 298.04 nm | f=0.0318 |  |
| <S**2>=0.000  |     |           |           |           |          |  |
| 130 ->137     |     | -0.40050  |           |           |          |  |
| 131 ->137     |     | 0.44017   |           |           |          |  |
| 132 ->137     |     | -0.13142  |           |           |          |  |

**Table S2. continued.**

|               |     |           |           |           |          |
|---------------|-----|-----------|-----------|-----------|----------|
| 136 ->142     |     | -0.29862  |           |           |          |
| Excited State | 12: | Singlet-A | 4.2040 eV | 294.92 nm | f=0.0098 |
| <S**2>=0.000  |     |           |           |           |          |
| 130 ->137     |     | 0.32283   |           |           |          |
| 131 ->137     |     | 0.42528   |           |           |          |
| 132 ->137     |     | -0.10711  |           |           |          |
| 134 ->138     |     | -0.19843  |           |           |          |
| 135 ->139     |     | 0.26903   |           |           |          |
| 136 ->142     |     | 0.25690   |           |           |          |
| Excited State | 13: | Singlet-A | 4.3310 eV | 286.27 nm | f=0.0099 |
| <S**2>=0.000  |     |           |           |           |          |
| 130 ->137     |     | -0.11457  |           |           |          |
| 131 ->137     |     | -0.23037  |           |           |          |
| 134 ->138     |     | -0.25084  |           |           |          |
| 135 ->139     |     | 0.54553   |           |           |          |
| 136 ->142     |     | -0.21128  |           |           |          |
| Excited State | 14: | Singlet-A | 4.3877 eV | 282.57 nm | f=0.0085 |
| <S**2>=0.000  |     |           |           |           |          |
| 130 ->137     |     | 0.26034   |           |           |          |
| 134 ->138     |     | 0.54508   |           |           |          |
| 135 ->139     |     | 0.22407   |           |           |          |
| 136 ->142     |     | -0.24164  |           |           |          |
| Excited State | 15: | Singlet-A | 4.6297 eV | 267.80 nm | f=0.0026 |
| <S**2>=0.000  |     |           |           |           |          |
| 136 ->142     |     | -0.12779  |           |           |          |
| 136 ->143     |     | 0.65268   |           |           |          |
| Excited State | 16: | Singlet-A | 4.6710 eV | 265.43 nm | f=0.0423 |
| <S**2>=0.000  |     |           |           |           |          |
| 127 ->137     |     | -0.14100  |           |           |          |
| 129 ->137     |     | 0.14744   |           |           |          |

**Table S2. continued.**

|                   |           |           |           |          |  |
|-------------------|-----------|-----------|-----------|----------|--|
| 134 ->141         | 0.10325   |           |           |          |  |
| 135 ->140         | 0.61200   |           |           |          |  |
| 136 ->141         | -0.12335  |           |           |          |  |
| 136 ->143         | 0.10064   |           |           |          |  |
| Excited State 17: | Singlet-A | 4.7099 eV | 263.24 nm | f=0.0126 |  |
| <S**2>=0.000      |           |           |           |          |  |
| 128 ->137         | 0.20260   |           |           |          |  |
| 130 ->137         | 0.22403   |           |           |          |  |
| 134 ->138         | -0.12465  |           |           |          |  |
| 134 ->140         | 0.10615   |           |           |          |  |
| 135 ->139         | -0.10552  |           |           |          |  |
| 135 ->141         | 0.38320   |           |           |          |  |
| 136 ->142         | -0.38138  |           |           |          |  |
| 136 ->143         | -0.19972  |           |           |          |  |
| Excited State 18: | Singlet-A | 4.7699 eV | 259.93 nm | f=0.0072 |  |
| <S**2>=0.000      |           |           |           |          |  |
| 127 ->137         | 0.10326   |           |           |          |  |
| 129 ->137         | 0.58151   |           |           |          |  |
| 130 ->138         | -0.10688  |           |           |          |  |
| 135 ->140         | -0.18227  |           |           |          |  |
| 135 ->142         | 0.15936   |           |           |          |  |
| 136 ->144         | 0.22551   |           |           |          |  |
| Excited State 19: | Singlet-A | 4.7779 eV | 259.50 nm | f=0.0007 |  |
| <S**2>=0.000      |           |           |           |          |  |
| 133 ->137         | 0.31895   |           |           |          |  |
| 133 ->138         | 0.55634   |           |           |          |  |
| 133 ->139         | 0.23127   |           |           |          |  |
| 133 ->140         | -0.11835  |           |           |          |  |
| Excited State 20: | Singlet-A | 4.7913 eV | 258.77 nm | f=0.0007 |  |
| <S**2>=0.000      |           |           |           |          |  |
| 131 ->138         | 0.14497   |           |           |          |  |

**Table S2. continued.**

|           |          |
|-----------|----------|
| 132 ->137 | -0.30470 |
| 132 ->138 | 0.54792  |
| 132 ->139 | -0.22860 |
| 132 ->140 | -0.11971 |

SavETr: write IOETrn= 770 NScale= 10 NData= 16 NLR=1 NState= 20  
LETran= 370.

**Table S3. TD-DFT results for 4ac (isomer C) in acetonitrile**

Excited State 1: Singlet-A 2.2331 eV 555.20 nm f=3.2010  
<S\*\*2>=0.000  
136 ->137 0.70702

This state for optimization and/or second-order correction.

Total Energy, E(TD-HF/TD-DFT) = -1826.04683789

Copying the excited state density for this state as the 1-particle RhoCI density.

Excited State 2: Singlet-A 2.7676 eV 447.99 nm f=0.0052  
<S\*\*2>=0.000  
135 ->137 -0.44287  
136 ->138 0.54349

Excited State 3: Singlet-A 3.2077 eV 386.52 nm f=0.1407  
<S\*\*2>=0.000  
135 ->137 0.54611  
136 ->138 0.44466

Excited State 4: Singlet-A 3.5188 eV 352.35 nm f=0.0046  
<S\*\*2>=0.000  
134 ->137 -0.43682  
136 ->139 0.54433

Excited State 5: Singlet-A 3.5896 eV 345.40 nm f=0.4134  
<S\*\*2>=0.000  
134 ->137 0.20884  
135 ->138 0.64090  
136 ->139 0.19684

Excited State 6: Singlet-A 3.8799 eV 319.56 nm f=0.0823  
<S\*\*2>=0.000  
134 ->137 0.41120  
135 ->138 -0.21497  
135 ->140 0.11415  
136 ->139 0.34430

**Table S3. continued.**

|               |     |           |           |           |          |  |
|---------------|-----|-----------|-----------|-----------|----------|--|
| 136 ->141     |     |           | -0.37492  |           |          |  |
| Excited State | 7:  | Singlet-A | 3.9387 eV | 314.79 nm | f=0.0013 |  |
| <S**2>=0.000  |     |           |           |           |          |  |
| 130 ->137     |     |           | -0.12912  |           |          |  |
| 135 ->141     |     |           | -0.10516  |           |          |  |
| 136 ->140     |     |           | 0.67175   |           |          |  |
| Excited State | 8:  | Singlet-A | 4.0215 eV | 308.30 nm | f=0.0001 |  |
| <S**2>=0.000  |     |           |           |           |          |  |
| 131 ->138     |     |           | -0.29962  |           |          |  |
| 132 ->137     |     |           | 0.61986   |           |          |  |
| 132 ->139     |     |           | -0.13180  |           |          |  |
| Excited State | 9:  | Singlet-A | 4.0216 eV | 308.30 nm | f=0.0013 |  |
| <S**2>=0.000  |     |           |           |           |          |  |
| 131 ->137     |     |           | 0.62007   |           |          |  |
| 131 ->139     |     |           | -0.13191  |           |          |  |
| 132 ->138     |     |           | -0.29950  |           |          |  |
| Excited State | 10: | Singlet-A | 4.1557 eV | 298.35 nm | f=0.2855 |  |
| <S**2>=0.000  |     |           |           |           |          |  |
| 134 ->137     |     |           | 0.29601   |           |          |  |
| 135 ->138     |     |           | -0.18188  |           |          |  |
| 136 ->139     |     |           | 0.18467   |           |          |  |
| 136 ->141     |     |           | 0.57397   |           |          |  |
| Excited State | 11: | Singlet-A | 4.1849 eV | 296.27 nm | f=0.0299 |  |
| <S**2>=0.000  |     |           |           |           |          |  |
| 133 ->137     |     |           | 0.59714   |           |          |  |
| 134 ->138     |     |           | -0.20879  |           |          |  |
| 135 ->139     |     |           | 0.26015   |           |          |  |
| 136 ->142     |     |           | -0.11947  |           |          |  |
| Excited State | 12: | Singlet-A | 4.1967 eV | 295.43 nm | f=0.0040 |  |

**Table S3. continued.**

&lt;S\*\*2&gt;=0.000

|           |         |
|-----------|---------|
| 130 ->137 | 0.50117 |
| 133 ->137 | 0.12647 |
| 134 ->138 | 0.13418 |
| 136 ->142 | 0.42886 |

Excited State 13: Singlet-A 4.3244 eV 286.71 nm f=0.0176

&lt;S\*\*2&gt;=0.000

|           |          |
|-----------|----------|
| 133 ->137 | -0.30373 |
| 134 ->138 | -0.33077 |
| 135 ->139 | 0.48803  |
| 136 ->142 | 0.18996  |

Excited State 14: Singlet-A 4.3752 eV 283.38 nm f=0.0096

&lt;S\*\*2&gt;=0.000

|           |          |
|-----------|----------|
| 130 ->137 | -0.28510 |
| 134 ->138 | 0.48622  |
| 135 ->139 | 0.32764  |
| 136 ->140 | -0.10344 |
| 136 ->142 | 0.20348  |

Excited State 15: Singlet-A 4.5087 eV 274.99 nm f=0.0000

&lt;S\*\*2&gt;=0.000

|           |         |
|-----------|---------|
| 134 ->143 | 0.10250 |
| 136 ->143 | 0.69188 |

Excited State 16: Singlet-A 4.6558 eV 266.30 nm f=0.0435

&lt;S\*\*2&gt;=0.000

|           |          |
|-----------|----------|
| 127 ->137 | 0.13469  |
| 129 ->137 | -0.10731 |
| 135 ->140 | 0.63323  |
| 136 ->141 | 0.13701  |

Excited State 17: Singlet-A 4.6902 eV 264.35 nm f=0.0192

&lt;S\*\*2&gt;=0.000



**Table S3. continued.**

|           |          |
|-----------|----------|
| 128 ->137 | 0.18402  |
| 130 ->137 | -0.27792 |
| 134 ->138 | -0.15323 |
| 134 ->140 | 0.10219  |
| 135 ->139 | -0.13802 |
| 135 ->141 | 0.36823  |
| 136 ->142 | 0.41144  |

Excited State 18: Singlet-A 4.7697 eV 259.94 nm f=0.0021  
<S\*\*2>=0.000

|           |          |
|-----------|----------|
| 129 ->137 | 0.53389  |
| 133 ->138 | 0.30167  |
| 135 ->140 | 0.14195  |
| 135 ->142 | -0.17892 |
| 136 ->144 | 0.21227  |

Excited State 19: Singlet-A 4.7827 eV 259.23 nm f=0.0013  
<S\*\*2>=0.000

|           |          |
|-----------|----------|
| 131 ->137 | 0.33475  |
| 131 ->139 | 0.22052  |
| 132 ->138 | 0.56403  |
| 132 ->140 | -0.11933 |

Excited State 20: Singlet-A 4.7827 eV 259.23 nm f=0.0001  
<S\*\*2>=0.000

|           |          |
|-----------|----------|
| 131 ->138 | 0.56512  |
| 131 ->140 | -0.11968 |
| 132 ->137 | 0.33491  |
| 132 ->139 | 0.22080  |

SavETr: write IOETrn= 770 NScale= 10 NData= 16 NLR=1 NState= 20  
LETran= 370.

**Table S4. TD-DFT results for 4cc (isomer A) in acetonitrile**

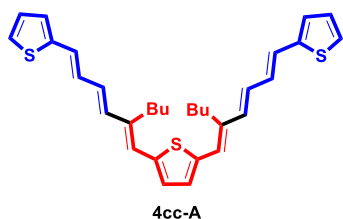

Excited State 1: Singlet-A 2.0771 eV 596.92 nm f=3.0210 <S\*\*2>=0.000  
 138 ->139 0.70828

This state for optimization and/or second-order correction.

Total Energy, E(TD-HF/TD-DFT) = -2435.48232688

Copying the excited state density for this state as the 1-particle RhoCI density.

Excited State 2: Singlet-A 2.5971 eV 477.39 nm f=0.0005 <S\*\*2>=0.000  
 137 ->139 0.54059  
 138 ->140 0.44658

Excited State 3: Singlet-A 3.0747 eV 403.24 nm f=0.2202 <S\*\*2>=0.000  
 137 ->139 -0.45372  
 138 ->140 0.54529

Excited State 4: Singlet-A 3.3007 eV 375.63 nm f=0.0143 <S\*\*2>=0.000  
 136 ->139 0.56316  
 137 ->140 0.11010  
 138 ->141 0.40276

Excited State 5: Singlet-A 3.4503 eV 359.34 nm f=0.1898 <S\*\*2>=0.000  
 136 ->139 0.13971  
 137 ->140 0.59171  
 138 ->141 -0.35413

Excited State 6: Singlet-A 3.8607 eV 321.14 nm f=0.4454 <S\*\*2>=0.000  
 136 ->139 -0.39770  
 137 ->140 0.36401  
 138 ->141 0.45405

Excited State 7: Singlet-A 3.9746 eV 311.94 nm f=0.0072 <S\*\*2>=0.000

**Table S4. continued.**

|                   |           |           |           |          |                                  |  |
|-------------------|-----------|-----------|-----------|----------|----------------------------------|--|
| 135 ->139         | 0.52850   |           |           |          |                                  |  |
| 136 ->140         | -0.11244  |           |           |          |                                  |  |
| 137 ->141         | 0.20401   |           |           |          |                                  |  |
| 138 ->142         | 0.38550   |           |           |          |                                  |  |
| Excited State 8:  | Singlet-A | 4.1063 eV | 301.94 nm | f=0.0052 | $\langle S^{*2} \rangle = 0.000$ |  |
| 132 ->139         | 0.22360   |           |           |          |                                  |  |
| 135 ->139         | 0.18152   |           |           |          |                                  |  |
| 136 ->140         | 0.51728   |           |           |          |                                  |  |
| 137 ->141         | -0.36172  |           |           |          |                                  |  |
| Excited State 9:  | Singlet-A | 4.1966 eV | 295.44 nm | f=0.0030 | $\langle S^{*2} \rangle = 0.000$ |  |
| 132 ->139         | 0.51019   |           |           |          |                                  |  |
| 135 ->139         | -0.24176  |           |           |          |                                  |  |
| 136 ->140         | -0.28963  |           |           |          |                                  |  |
| 137 ->141         | -0.19063  |           |           |          |                                  |  |
| 138 ->142         | 0.22391   |           |           |          |                                  |  |
| Excited State 10: | Singlet-A | 4.2391 eV | 292.48 nm | f=0.0595 | $\langle S^{*2} \rangle = 0.000$ |  |
| 132 ->139         | -0.30296  |           |           |          |                                  |  |
| 134 ->139         | 0.51290   |           |           |          |                                  |  |
| 137 ->141         | -0.29367  |           |           |          |                                  |  |
| 138 ->142         | 0.19674   |           |           |          |                                  |  |
| Excited State 11: | Singlet-A | 4.2445 eV | 292.11 nm | f=0.0013 | $\langle S^{*2} \rangle = 0.000$ |  |
| 133 ->139         | 0.69179   |           |           |          |                                  |  |
| 134 ->140         | -0.11264  |           |           |          |                                  |  |
| Excited State 12: | Singlet-A | 4.2553 eV | 291.37 nm | f=0.0024 | $\langle S^{*2} \rangle = 0.000$ |  |
| 132 ->139         | 0.27313   |           |           |          |                                  |  |
| 134 ->139         | 0.46122   |           |           |          |                                  |  |
| 136 ->140         | 0.15688   |           |           |          |                                  |  |
| 137 ->141         | 0.34243   |           |           |          |                                  |  |
| 138 ->142         | -0.24763  |           |           |          |                                  |  |

**Table S4. continued.**

|                   |           |           |           |          |                                   |
|-------------------|-----------|-----------|-----------|----------|-----------------------------------|
| Excited State 13: | Singlet-A | 4.6307 eV | 267.74 nm | f=0.0011 | $\langle S^{**2} \rangle = 0.000$ |
| 131 ->139         | 0.50047   |           |           |          |                                   |
| 135 ->140         | -0.16498  |           |           |          |                                   |
| 137 ->142         | 0.22495   |           |           |          |                                   |
| 138 ->143         | -0.38545  |           |           |          |                                   |
| Excited State 14: | Singlet-A | 4.6933 eV | 264.17 nm | f=0.1351 | $\langle S^{**2} \rangle = 0.000$ |
| 135 ->139         | -0.34285  |           |           |          |                                   |
| 136 ->140         | 0.30655   |           |           |          |                                   |
| 137 ->141         | 0.27486   |           |           |          |                                   |
| 138 ->142         | 0.43238   |           |           |          |                                   |
| Excited State 15: | Singlet-A | 4.7137 eV | 263.03 nm | f=0.0023 | $\langle S^{**2} \rangle = 0.000$ |
| 136 ->146         | -0.11588  |           |           |          |                                   |
| 138 ->146         | 0.68550   |           |           |          |                                   |
| Excited State 16: | Singlet-A | 4.7476 eV | 261.15 nm | f=0.0001 | $\langle S^{**2} \rangle = 0.000$ |
| 136 ->144         | 0.10961   |           |           |          |                                   |
| 137 ->145         | 0.26819   |           |           |          |                                   |
| 138 ->144         | 0.64232   |           |           |          |                                   |
| Excited State 17: | Singlet-A | 4.7479 eV | 261.14 nm | f=0.0000 | $\langle S^{**2} \rangle = 0.000$ |
| 136 ->145         | 0.10965   |           |           |          |                                   |
| 137 ->144         | 0.26810   |           |           |          |                                   |
| 138 ->145         | 0.64126   |           |           |          |                                   |
| Excited State 18: | Singlet-A | 4.8167 eV | 257.41 nm | f=0.0040 | $\langle S^{**2} \rangle = 0.000$ |
| 131 ->139         | 0.31650   |           |           |          |                                   |
| 135 ->140         | 0.55453   |           |           |          |                                   |
| 137 ->142         | -0.26738  |           |           |          |                                   |
| Excited State 19: | Singlet-A | 4.9040 eV | 252.82 nm | f=0.0308 | $\langle S^{**2} \rangle = 0.000$ |
| 131 ->139         | 0.19994   |           |           |          |                                   |
| 132 ->140         | -0.12015  |           |           |          |                                   |
| 134 ->140         | 0.10140   |           |           |          |                                   |

**Table S4. continued.**

136 ->141 0.26255

137 ->142 0.37702

138 ->143 0.45501

Excited State 20: Singlet-A 4.9550 eV 250.22 nm f=0.0220 <S\*\*2>=0.000

132 ->140 0.62381

136 ->141 0.28539

SavETr: write IOETrn= 770 NScale= 10 NData= 16 NLR=1 NState= 20 LETran=  
370.

**Table S5. TD-DFT results for 4cc (isomer B) in acetonitrile**

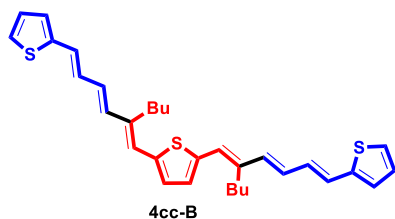

Excited State 1: Singlet-A 2.1206 eV 584.68 nm f=3.1542 <S\*\*2>=0.000  
 138 ->139 0.70783

This state for optimization and/or second-order correction.

Total Energy, E(TD-HF/TD-DFT) = -2435.48278464

Copying the excited state density for this state as the 1-particle RhoCI density.

Excited State 2: Singlet-A 2.6269 eV 471.99 nm f=0.0068 <S\*\*2>=0.000  
 137 ->139 0.52091  
 138 ->140 0.46909

Excited State 3: Singlet-A 3.0758 eV 403.10 nm f=0.1641 <S\*\*2>=0.000  
 137 ->139 -0.47533  
 138 ->140 0.52524

Excited State 4: Singlet-A 3.3348 eV 371.78 nm f=0.0119 <S\*\*2>=0.000  
 136 ->139 0.54237  
 137 ->140 -0.10528  
 138 ->141 0.43049

Excited State 5: Singlet-A 3.4368 eV 360.75 nm f=0.2996 <S\*\*2>=0.000  
 136 ->139 -0.13083  
 137 ->140 0.61602  
 138 ->141 0.31293

Excited State 6: Singlet-A 3.8516 eV 321.91 nm f=0.3347 <S\*\*2>=0.000  
 136 ->139 -0.42486  
 137 ->140 -0.31777  
 138 ->141 0.45612

**Table S5. continued.**

|               |           |           |           |           |          |                                  |
|---------------|-----------|-----------|-----------|-----------|----------|----------------------------------|
| Excited State | 7:        | Singlet-A | 3.9735 eV | 312.03 nm | f=0.0004 | $\langle S^{*2} \rangle = 0.000$ |
|               | 132 ->139 | 0.10598   |           |           |          |                                  |
|               | 135 ->139 | 0.45322   |           |           |          |                                  |
|               | 136 ->140 | 0.20066   |           |           |          |                                  |
|               | 137 ->141 | -0.22808  |           |           |          |                                  |
|               | 138 ->142 | -0.42514  |           |           |          |                                  |
| Excited State | 8:        | Singlet-A | 4.1059 eV | 301.96 nm | f=0.0005 | $\langle S^{*2} \rangle = 0.000$ |
|               | 132 ->139 | -0.25701  |           |           |          |                                  |
|               | 135 ->139 | -0.18315  |           |           |          |                                  |
|               | 136 ->140 | 0.46740   |           |           |          |                                  |
|               | 137 ->141 | -0.37188  |           |           |          |                                  |
|               | 138 ->142 | 0.16072   |           |           |          |                                  |
| Excited State | 9:        | Singlet-A | 4.1859 eV | 296.19 nm | f=0.0010 | $\langle S^{*2} \rangle = 0.000$ |
|               | 132 ->139 | 0.32604   |           |           |          |                                  |
|               | 135 ->139 | -0.34390  |           |           |          |                                  |
|               | 136 ->140 | 0.34833   |           |           |          |                                  |
|               | 137 ->141 | 0.26495   |           |           |          |                                  |
|               | 138 ->142 | -0.26461  |           |           |          |                                  |
| Excited State | 10:       | Singlet-A | 4.2372 eV | 292.61 nm | f=0.0258 | $\langle S^{*2} \rangle = 0.000$ |
|               | 132 ->139 | 0.46500   |           |           |          |                                  |
|               | 133 ->139 | -0.31122  |           |           |          |                                  |
|               | 135 ->139 | -0.11306  |           |           |          |                                  |
|               | 136 ->140 | -0.11030  |           |           |          |                                  |
|               | 137 ->141 | -0.34692  |           |           |          |                                  |
|               | 138 ->142 | 0.13738   |           |           |          |                                  |
| Excited State | 11:       | Singlet-A | 4.2664 eV | 290.61 nm | f=0.0337 | $\langle S^{*2} \rangle = 0.000$ |
|               | 133 ->139 | -0.26994  |           |           |          |                                  |
|               | 133 ->140 | 0.10529   |           |           |          |                                  |
|               | 134 ->139 | 0.62855   |           |           |          |                                  |
| Excited State | 12:       | Singlet-A | 4.2764 eV | 289.93 nm | f=0.0228 | $\langle S^{*2} \rangle = 0.000$ |

**Table S5. continued.**

|                   |           |           |           |          |              |  |
|-------------------|-----------|-----------|-----------|----------|--------------|--|
| 132 ->139         | 0.24778   |           |           |          |              |  |
| 133 ->139         | 0.53921   |           |           |          |              |  |
| 134 ->139         | 0.24857   |           |           |          |              |  |
| 137 ->141         | -0.17606  |           |           |          |              |  |
| 138 ->142         | 0.18164   |           |           |          |              |  |
| Excited State 13: | Singlet-A | 4.5409 eV | 273.04 nm | f=0.0017 | <S**2>=0.000 |  |
| 136 ->143         | 0.10563   |           |           |          |              |  |
| 138 ->143         | 0.64939   |           |           |          |              |  |
| 138 ->144         | 0.18600   |           |           |          |              |  |
| Excited State 14: | Singlet-A | 4.6476 eV | 266.77 nm | f=0.0152 | <S**2>=0.000 |  |
| 131 ->139         | 0.42186   |           |           |          |              |  |
| 135 ->139         | -0.15683  |           |           |          |              |  |
| 135 ->140         | -0.21845  |           |           |          |              |  |
| 136 ->140         | -0.13237  |           |           |          |              |  |
| 137 ->141         | -0.12022  |           |           |          |              |  |
| 137 ->142         | -0.27977  |           |           |          |              |  |
| 138 ->142         | -0.17625  |           |           |          |              |  |
| 138 ->144         | 0.27042   |           |           |          |              |  |
| Excited State 15: | Singlet-A | 4.6580 eV | 266.17 nm | f=0.0200 | <S**2>=0.000 |  |
| 131 ->139         | 0.19511   |           |           |          |              |  |
| 132 ->139         | 0.13738   |           |           |          |              |  |
| 133 ->139         | -0.10555  |           |           |          |              |  |
| 135 ->139         | 0.29454   |           |           |          |              |  |
| 135 ->140         | -0.10798  |           |           |          |              |  |
| 136 ->140         | 0.26452   |           |           |          |              |  |
| 137 ->141         | 0.23824   |           |           |          |              |  |
| 137 ->142         | -0.15410  |           |           |          |              |  |
| 138 ->142         | 0.35465   |           |           |          |              |  |
| 138 ->143         | 0.10388   |           |           |          |              |  |
| 138 ->144         | 0.17387   |           |           |          |              |  |
| Excited State 16: | Singlet-A | 4.7984 eV | 258.39 nm | f=0.0025 | <S**2>=0.000 |  |



**Table S5. continued.**

|                   |           |           |           |          |              |  |
|-------------------|-----------|-----------|-----------|----------|--------------|--|
| 131 ->139         | 0.37451   |           |           |          |              |  |
| 135 ->140         | 0.50306   |           |           |          |              |  |
| 137 ->142         | 0.27285   |           |           |          |              |  |
| 138 ->144         | 0.10718   |           |           |          |              |  |
| Excited State 17: | Singlet-A | 4.8610 eV | 255.06 nm | f=0.0002 | <S**2>=0.000 |  |
| 136 ->146         | -0.11190  |           |           |          |              |  |
| 137 ->146         | -0.26682  |           |           |          |              |  |
| 138 ->146         | 0.62755   |           |           |          |              |  |
| Excited State 18: | Singlet-A | 4.8712 eV | 254.52 nm | f=0.0007 | <S**2>=0.000 |  |
| 136 ->145         | -0.10827  |           |           |          |              |  |
| 137 ->145         | 0.27966   |           |           |          |              |  |
| 138 ->145         | 0.61843   |           |           |          |              |  |
| Excited State 19: | Singlet-A | 4.8756 eV | 254.30 nm | f=0.0138 | <S**2>=0.000 |  |
| 132 ->140         | 0.38212   |           |           |          |              |  |
| 135 ->140         | -0.22420  |           |           |          |              |  |
| 137 ->142         | 0.40709   |           |           |          |              |  |
| 138 ->144         | 0.26473   |           |           |          |              |  |
| 138 ->145         | -0.13636  |           |           |          |              |  |
| 138 ->146         | -0.11001  |           |           |          |              |  |
| Excited State 20: | Singlet-A | 4.9219 eV | 251.90 nm | f=0.0251 | <S**2>=0.000 |  |
| 131 ->139         | 0.11889   |           |           |          |              |  |
| 132 ->140         | 0.51154   |           |           |          |              |  |
| 133 ->140         | 0.18546   |           |           |          |              |  |
| 134 ->140         | 0.13758   |           |           |          |              |  |
| 136 ->141         | 0.22590   |           |           |          |              |  |
| 137 ->142         | -0.14433  |           |           |          |              |  |
| 138 ->144         | -0.27023  |           |           |          |              |  |

SavETr: write IOETrn= 770 NScale= 10 NData= 16 NLR=1 NState= 20 LETran=  
370.

**Table S6. TD-DFT results for 4cc (isomer C) in acetonitrile**

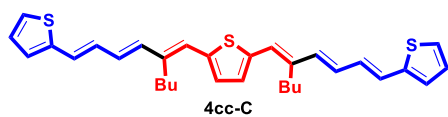

Excited State 1: Singlet-A 2.1544 eV 575.48 nm f=3.2120  
 $\langle S^{*2} \rangle = 0.000$

138 ->139 0.70763

This state for optimization and/or second-order correction.

Total Energy, E(TD-HF/TD-DFT) = -2435.48005761

Copying the excited state density for this state as the 1-particle RhoCI density.

Excited State 2: Singlet-A 2.6430 eV 469.11 nm f=0.0002  
 $\langle S^{*2} \rangle = 0.000$

137 ->139 0.50940

138 ->140 -0.48147

Excited State 3: Singlet-A 3.0771 eV 402.92 nm f=0.1570  
 $\langle S^{*2} \rangle = 0.000$

137 ->139 0.48770

138 ->140 0.51409

Excited State 4: Singlet-A 3.3626 eV 368.71 nm f=0.0397  
 $\langle S^{*2} \rangle = 0.000$

136 ->139 0.54820

137 ->140 -0.18858

138 ->141 -0.39247

Excited State 5: Singlet-A 3.4116 eV 363.42 nm f=0.3786  
 $\langle S^{*2} \rangle = 0.000$

137 ->140 0.61834

138 ->141 -0.33225

Excited State 6: Singlet-A 3.8551 eV 321.61 nm f=0.1602  
 $\langle S^{*2} \rangle = 0.000$

136 ->139 0.43579

137 ->140 0.27153

**Table S6. continued.**

|               |     |           |           |           |          |
|---------------|-----|-----------|-----------|-----------|----------|
| 138 ->141     |     | 0.47580   |           |           |          |
| Excited State | 7:  | Singlet-A | 3.9623 eV | 312.91 nm | f=0.0010 |
| <S**2>=0.000  |     |           |           |           |          |
| 132 ->139     |     | -0.10266  |           |           |          |
| 135 ->139     |     | 0.39305   |           |           |          |
| 136 ->140     |     | -0.27402  |           |           |          |
| 137 ->141     |     | 0.24468   |           |           |          |
| 138 ->142     |     | 0.43617   |           |           |          |
| Excited State | 8:  | Singlet-A | 4.1013 eV | 302.30 nm | f=0.0006 |
| <S**2>=0.000  |     |           |           |           |          |
| 132 ->139     |     | -0.23453  |           |           |          |
| 135 ->139     |     | 0.21677   |           |           |          |
| 136 ->140     |     | 0.46410   |           |           |          |
| 137 ->141     |     | -0.33382  |           |           |          |
| 138 ->142     |     | 0.23123   |           |           |          |
| Excited State | 9:  | Singlet-A | 4.1752 eV | 296.96 nm | f=0.0044 |
| <S**2>=0.000  |     |           |           |           |          |
| 132 ->139     |     | 0.23239   |           |           |          |
| 135 ->139     |     | 0.39144   |           |           |          |
| 136 ->140     |     | 0.31331   |           |           |          |
| 137 ->141     |     | 0.31927   |           |           |          |
| 138 ->142     |     | -0.27885  |           |           |          |
| Excited State | 10: | Singlet-A | 4.2588 eV | 291.12 nm | f=0.0661 |
| <S**2>=0.000  |     |           |           |           |          |
| 132 ->139     |     | 0.52129   |           |           |          |
| 133 ->139     |     | -0.21926  |           |           |          |
| 135 ->139     |     | 0.17165   |           |           |          |
| 136 ->140     |     | -0.11602  |           |           |          |
| 137 ->141     |     | -0.34237  |           |           |          |
| Excited State | 11: | Singlet-A | 4.2874 eV | 289.18 nm | f=0.0355 |

**Table S6. continued.**

&lt;S\*\*2&gt;=0.000

133 -&gt;140 0.13017

134 -&gt;139 0.68284

Excited State 12: Singlet-A 4.2933 eV 288.78 nm f=0.0000

&lt;S\*\*2&gt;=0.000

132 -&gt;139 0.17407

133 -&gt;139 0.63894

134 -&gt;140 0.11737

137 -&gt;141 -0.14065

138 -&gt;142 0.14088

Excited State 13: Singlet-A 4.4091 eV 281.20 nm f=0.0034

&lt;S\*\*2&gt;=0.000

136 -&gt;143 -0.11470

138 -&gt;143 0.68636

Excited State 14: Singlet-A 4.6304 eV 267.76 nm f=0.0487

&lt;S\*\*2&gt;=0.000

132 -&gt;139 0.26209

135 -&gt;139 -0.32312

136 -&gt;140 0.29026

137 -&gt;141 0.27694

138 -&gt;142 0.37814

Excited State 15: Singlet-A 4.6372 eV 267.37 nm f=0.0047

&lt;S\*\*2&gt;=0.000

131 -&gt;139 -0.38264

135 -&gt;140 0.32959

137 -&gt;142 0.39758

138 -&gt;144 0.25986

Excited State 16: Singlet-A 4.7705 eV 259.90 nm f=0.0083

&lt;S\*\*2&gt;=0.000

131 -&gt;139 0.43148

**Table S6. continued.**

|                   |           |           |           |          |  |
|-------------------|-----------|-----------|-----------|----------|--|
| 132 ->140         | 0.12711   |           |           |          |  |
| 135 ->140         | 0.49297   |           |           |          |  |
| 137 ->142         | 0.10990   |           |           |          |  |
| 138 ->144         | -0.15600  |           |           |          |  |
| Excited State 17: | Singlet-A | 4.8260 eV | 256.91 nm | f=0.0167 |  |
| <S**2>=0.000      |           |           |           |          |  |
| 131 ->139         | 0.12038   |           |           |          |  |
| 132 ->140         | -0.35560  |           |           |          |  |
| 135 ->140         | -0.21658  |           |           |          |  |
| 137 ->142         | 0.47533   |           |           |          |  |
| 138 ->144         | -0.26096  |           |           |          |  |
| Excited State 18: | Singlet-A | 4.8838 eV | 253.87 nm | f=0.0000 |  |
| <S**2>=0.000      |           |           |           |          |  |
| 136 ->145         | 0.11527   |           |           |          |  |
| 137 ->146         | 0.28858   |           |           |          |  |
| 138 ->145         | 0.62969   |           |           |          |  |
| Excited State 19: | Singlet-A | 4.8840 eV | 253.86 nm | f=0.0001 |  |
| <S**2>=0.000      |           |           |           |          |  |
| 136 ->146         | 0.11506   |           |           |          |  |
| 137 ->145         | 0.28837   |           |           |          |  |
| 138 ->146         | 0.62784   |           |           |          |  |
| Excited State 20: | Singlet-A | 4.9121 eV | 252.40 nm | f=0.0054 |  |
| <S**2>=0.000      |           |           |           |          |  |
| 131 ->139         | -0.14580  |           |           |          |  |
| 132 ->140         | 0.44066   |           |           |          |  |
| 133 ->140         | 0.37148   |           |           |          |  |
| 135 ->140         | -0.12282  |           |           |          |  |
| 136 ->141         | 0.12183   |           |           |          |  |
| 137 ->142         | 0.15382   |           |           |          |  |
| 138 ->144         | -0.26485  |           |           |          |  |

SavETr: write IOETrn= 770 NScale= 10 NData= 16 NLR=1 NState= 20

**Table S6. continued.**

LETran= 370.

**Table S7. TD-DFT results for 4ee in acetonitrile**

Excited State 1: Singlet-A 2.4678 eV 502.40 nm f=3.3248  
<S\*\*2>=0.000  
135 ->136 0.70589

This state for optimization and/or second-order correction.

Total Energy, E(TD-HF/TD-DFT) = -1473.19491733

Copying the excited state density for this state as the 1-particle RhoCI density.

Excited State 2: Singlet-A 2.9587 eV 419.05 nm f=0.0003  
<S\*\*2>=0.000  
134 ->136 0.56007  
135 ->137 -0.42251

Excited State 3: Singlet-A 3.3317 eV 372.14 nm f=0.0124  
<S\*\*2>=0.000  
134 ->136 0.42805  
135 ->137 0.56383

Excited State 4: Singlet-A 3.6688 eV 337.94 nm f=0.6069  
<S\*\*2>=0.000  
133 ->136 -0.28588  
134 ->137 0.64087

Excited State 5: Singlet-A 3.7674 eV 329.09 nm f=0.0490  
<S\*\*2>=0.000  
133 ->136 0.46175  
134 ->137 0.20088  
135 ->138 0.48381

Excited State 6: Singlet-A 4.0707 eV 304.57 nm f=0.0096  
<S\*\*2>=0.000  
129 ->136 0.46219  
135 ->139 0.50989

Excited State 7: Singlet-A 4.2062 eV 294.77 nm f=0.1898

**Table S7. continued.** $\langle S^{*2} \rangle = 0.000$ 

|           |          |
|-----------|----------|
| 131 ->136 | 0.13980  |
| 133 ->136 | -0.40886 |
| 134 ->137 | -0.18209 |
| 134 ->140 | 0.10343  |
| 135 ->138 | 0.46407  |
| 135 ->141 | 0.18476  |

|               |    |           |           |           |          |
|---------------|----|-----------|-----------|-----------|----------|
| Excited State | 8: | Singlet-A | 4.2503 eV | 291.70 nm | f=0.0001 |
|---------------|----|-----------|-----------|-----------|----------|

 $\langle S^{*2} \rangle = 0.000$ 

|           |         |
|-----------|---------|
| 131 ->137 | 0.16508 |
| 132 ->136 | 0.48907 |
| 133 ->137 | 0.11080 |
| 134 ->138 | 0.21451 |
| 134 ->141 | 0.15566 |
| 135 ->140 | 0.36552 |

|               |    |           |           |           |          |
|---------------|----|-----------|-----------|-----------|----------|
| Excited State | 9: | Singlet-A | 4.2808 eV | 289.63 nm | f=0.0454 |
|---------------|----|-----------|-----------|-----------|----------|

 $\langle S^{*2} \rangle = 0.000$ 

|           |          |
|-----------|----------|
| 130 ->137 | 0.11036  |
| 131 ->136 | 0.50875  |
| 132 ->137 | 0.15570  |
| 133 ->136 | 0.15366  |
| 134 ->140 | 0.16002  |
| 135 ->138 | -0.18047 |
| 135 ->141 | 0.31688  |

|               |     |           |           |           |          |
|---------------|-----|-----------|-----------|-----------|----------|
| Excited State | 10: | Singlet-A | 4.3090 eV | 287.74 nm | f=0.0000 |
|---------------|-----|-----------|-----------|-----------|----------|

 $\langle S^{*2} \rangle = 0.000$ 

|           |          |
|-----------|----------|
| 130 ->136 | 0.49814  |
| 131 ->137 | 0.11341  |
| 133 ->137 | -0.21326 |
| 134 ->138 | -0.30904 |
| 134 ->141 | 0.11503  |
| 135 ->140 | 0.11492  |



**Table S7. continued.**

|               |     |           |           |           |          |
|---------------|-----|-----------|-----------|-----------|----------|
| 135 ->142     |     | -0.24086  |           |           |          |
| Excited State | 11: | Singlet-A | 4.4505 eV | 278.59 nm | f=0.0004 |
| <S**2>=0.000  |     |           |           |           |          |
| 130 ->136     |     | 0.35206   |           |           |          |
| 132 ->136     |     | -0.20131  |           |           |          |
| 133 ->137     |     | 0.46220   |           |           |          |
| 134 ->138     |     | 0.30033   |           |           |          |
| 135 ->142     |     | -0.12316  |           |           |          |
| Excited State | 12: | Singlet-A | 4.5105 eV | 274.88 nm | f=0.0571 |
| <S**2>=0.000  |     |           |           |           |          |
| 129 ->136     |     | 0.51126   |           |           |          |
| 135 ->139     |     | -0.47395  |           |           |          |
| Excited State | 13: | Singlet-A | 4.5248 eV | 274.01 nm | f=0.0076 |
| <S**2>=0.000  |     |           |           |           |          |
| 130 ->136     |     | -0.16730  |           |           |          |
| 132 ->136     |     | -0.40823  |           |           |          |
| 135 ->140     |     | 0.53272   |           |           |          |
| Excited State | 14: | Singlet-A | 4.5419 eV | 272.98 nm | f=0.0498 |
| <S**2>=0.000  |     |           |           |           |          |
| 131 ->136     |     | -0.42151  |           |           |          |
| 134 ->140     |     | 0.10186   |           |           |          |
| 135 ->141     |     | 0.54170   |           |           |          |
| Excited State | 15: | Singlet-A | 4.5995 eV | 269.56 nm | f=0.0000 |
| <S**2>=0.000  |     |           |           |           |          |
| 133 ->137     |     | -0.38578  |           |           |          |
| 134 ->138     |     | 0.45812   |           |           |          |
| 135 ->142     |     | -0.35479  |           |           |          |
| Excited State | 16: | Singlet-A | 4.7837 eV | 259.18 nm | f=0.0000 |
| <S**2>=0.000  |     |           |           |           |          |

**Table S7. continued.**

|                   |           |           |           |          |  |
|-------------------|-----------|-----------|-----------|----------|--|
| 129 ->137         | 0.10496   |           |           |          |  |
| 134 ->139         | 0.69268   |           |           |          |  |
| Excited State 17: | Singlet-A | 4.9322 eV | 251.38 nm | f=0.0016 |  |
| <S**2>=0.000      |           |           |           |          |  |
| 128 ->136         | 0.37992   |           |           |          |  |
| 130 ->137         | 0.10871   |           |           |          |  |
| 131 ->136         | 0.10400   |           |           |          |  |
| 132 ->137         | -0.33094  |           |           |          |  |
| 134 ->140         | -0.33135  |           |           |          |  |
| 134 ->142         | -0.20852  |           |           |          |  |
| 135 ->141         | 0.14684   |           |           |          |  |
| 135 ->143         | 0.17515   |           |           |          |  |
| Excited State 18: | Singlet-A | 4.9615 eV | 249.89 nm | f=0.0003 |  |
| <S**2>=0.000      |           |           |           |          |  |
| 130 ->136         | -0.12135  |           |           |          |  |
| 131 ->137         | 0.45663   |           |           |          |  |
| 132 ->136         | -0.14870  |           |           |          |  |
| 133 ->140         | 0.10254   |           |           |          |  |
| 134 ->141         | 0.39785   |           |           |          |  |
| 135 ->140         | -0.22818  |           |           |          |  |
| Excited State 19: | Singlet-A | 4.9616 eV | 249.89 nm | f=0.0006 |  |
| <S**2>=0.000      |           |           |           |          |  |
| 128 ->136         | 0.33443   |           |           |          |  |
| 130 ->137         | 0.30165   |           |           |          |  |
| 131 ->136         | -0.15602  |           |           |          |  |
| 132 ->137         | 0.24871   |           |           |          |  |
| 134 ->140         | 0.28308   |           |           |          |  |
| 134 ->142         | -0.19736  |           |           |          |  |
| 135 ->141         | -0.19803  |           |           |          |  |
| 135 ->143         | 0.15863   |           |           |          |  |
| Excited State 20: | Singlet-A | 4.9619 eV | 249.87 nm | f=0.0002 |  |

**Table S7. continued.**

<S\*\*2>=0.000

129 ->137            0.68701

134 ->139            -0.10250

SavETr: write IOETrn= 770 NScale= 10 NData= 16 NLR=1 NState= 20

LETran= 370.

**Table S8. Cartesian coordinates of isomer A of 4ac by TD-DFT calculations**

Energy: -1145911.8049426

|   |          |          |          |
|---|----------|----------|----------|
| C | -1.27531 | -2.27601 | 0.03629  |
| C | -2.69343 | -2.04307 | 0.05852  |
| S | 0.00000  | -1.06183 | -0.00000 |
| C | -0.70209 | -3.54486 | 0.01623  |
| C | 1.27531  | -2.27601 | -0.03629 |
| C | 0.70209  | -3.54486 | -0.01623 |
| H | -1.30529 | -4.44672 | 0.02821  |
| C | 2.69343  | -2.04307 | -0.05853 |
| H | 1.30529  | -4.44672 | -0.02821 |
| C | -3.45016 | -0.90048 | 0.13027  |
| H | -3.24982 | -2.97933 | 0.01016  |
| C | -2.87533 | 0.49851  | 0.19823  |
| C | -4.88941 | -1.07248 | 0.10821  |
| C | 3.45016  | -0.90047 | -0.13028 |
| H | 3.24982  | -2.97933 | -0.01016 |
| C | 2.87533  | 0.49851  | -0.19823 |
| C | 4.88941  | -1.07248 | -0.10821 |
| C | 5.84023  | -0.09731 | -0.15197 |
| H | 5.23846  | -2.10392 | -0.04477 |
| H | 5.55231  | 0.95059  | -0.20974 |
| C | 7.25240  | -0.37588 | -0.12352 |
| C | -5.84023 | -0.09731 | 0.15197  |
| H | -5.23846 | -2.10392 | 0.04477  |
| H | -5.55231 | 0.95059  | 0.20974  |
| C | -7.25240 | -0.37588 | 0.12352  |
| C | -8.21132 | 0.58348  | 0.16633  |
| H | -7.53478 | -1.42660 | 0.06398  |
| H | -7.91043 | 1.62816  | 0.22525  |
| C | -9.66037 | 0.38869  | 0.14215  |
| C | 8.21132  | 0.58348  | -0.16633 |
| H | 7.53478  | -1.42660 | -0.06398 |
| H | 7.91043  | 1.62816  | -0.22525 |
| C | 9.66037  | 0.38869  | -0.14215 |

**Table S8. continued.**

|   |            |           |           |
|---|------------|-----------|-----------|
| C | -10. 27775 | -0. 87719 | 0. 06966  |
| N | -10. 39243 | 1. 52851  | 0. 19504  |
| C | -11. 72577 | 1. 42801  | 0. 17680  |
| C | -11. 66496 | -0. 95961 | 0. 05176  |
| C | -12. 41633 | 0. 21731  | 0. 10633  |
| H | -12. 27447 | 2. 36800  | 0. 22096  |
| H | -9. 67885  | -1. 78089 | 0. 02817  |
| H | -12. 15440 | -1. 92794 | -0. 00392 |
| H | -13. 50138 | 0. 20002  | 0. 09486  |
| C | 10. 27775  | -0. 87719 | -0. 06966 |
| N | 10. 39243  | 1. 52851  | -0. 19505 |
| C | 11. 72578  | 1. 42802  | -0. 17681 |
| C | 11. 66496  | -0. 95960 | -0. 05176 |
| C | 12. 41633  | 0. 21731  | -0. 10634 |
| H | 12. 27447  | 2. 36800  | -0. 22098 |
| H | 9. 67885   | -1. 78089 | -0. 02815 |
| H | 12. 15441  | -1. 92793 | 0. 00393  |
| H | 13. 50138  | 0. 20003  | -0. 09487 |
| C | 2. 71607   | 1. 16426  | 1. 18618  |
| H | 3. 52340   | 1. 12658  | -0. 82129 |
| H | 1. 90586   | 0. 48676  | -0. 70793 |
| H | -3. 52340  | 1. 12657  | 0. 82129  |
| H | -1. 90586  | 0. 48676  | 0. 70793  |
| C | -2. 71608  | 1. 16426  | -1. 18618 |
| H | -2. 05058  | 0. 55103  | -1. 80872 |
| H | -3. 68979  | 1. 17573  | -1. 69411 |
| C | -2. 16535  | 2. 59320  | -1. 10052 |
| H | 2. 05058   | 0. 55102  | 1. 80872  |
| H | 3. 68978   | 1. 17572  | 1. 69412  |
| C | 2. 16535   | 2. 59319  | 1. 10053  |
| H | -2. 82979  | 3. 20011  | -0. 46933 |
| H | -1. 19111  | 2. 57607  | -0. 59103 |
| C | -2. 01313  | 3. 25844  | -2. 47262 |
| H | -1. 32742  | 2. 69073  | -3. 11373 |
| H | -2. 97790  | 3. 31998  | -2. 99125 |

**Table S8. continued.**

|   |           |          |           |
|---|-----------|----------|-----------|
| H | -1. 61803 | 4. 27667 | -2. 38013 |
| H | 2. 82979  | 3. 20011 | 0. 46935  |
| H | 1. 19111  | 2. 57607 | 0. 59104  |
| C | 2. 01311  | 3. 25842 | 2. 47263  |
| H | 1. 32740  | 2. 69071 | 3. 11374  |
| H | 2. 97788  | 3. 31996 | 2. 99126  |
| H | 1. 61802  | 4. 27665 | 2. 38015  |

**Table S9. Cartesian coordinates of isomer B of 4ac by TD-DFT calculations**

Energy: -1145904.3798678

|   |           |          |          |
|---|-----------|----------|----------|
| C | 1.12420   | 1.00426  | -0.11116 |
| C | 2.42212   | 0.37850  | -0.11431 |
| S | -0.28073  | -0.05980 | -0.18386 |
| C | 0.69705   | 2.32630  | -0.03718 |
| C | -1.41549  | 1.28032  | -0.13220 |
| C | -0.70297  | 2.47355  | -0.04858 |
| H | 1.36958   | 3.16772  | 0.06038  |
| C | -2.85161  | 1.21035  | -0.14616 |
| H | -1.20280  | 3.43500  | 0.01162  |
| C | 3.66783   | 0.91852  | -0.31399 |
| H | 2.39540   | -0.69742 | 0.05570  |
| C | 3.91404   | 2.38083  | -0.61466 |
| C | 4.79538   | 0.01159  | -0.22148 |
| C | -3.72960  | 0.16412  | -0.27427 |
| H | -3.29944  | 2.19797  | -0.03432 |
| C | -3.31029  | -1.28133 | -0.43837 |
| C | -5.14161  | 0.48910  | -0.21949 |
| C | -6.19270  | -0.37355 | -0.30576 |
| H | -5.37573  | 1.54643  | -0.08930 |
| H | -6.02017  | -1.44092 | -0.42982 |
| C | -7.56654  | 0.05237  | -0.23896 |
| C | 6.11476   | 0.31790  | -0.36735 |
| H | 4.54641   | -1.02791 | -0.00434 |
| H | 6.42264   | 1.34071  | -0.57604 |
| C | 7.16568   | -0.66025 | -0.25572 |
| C | 8.48325   | -0.36858 | -0.39746 |
| H | 6.85243   | -1.68231 | -0.04466 |
| H | 8.77617   | 0.65885  | -0.60686 |
| C | 9.61118   | -1.29445 | -0.30067 |
| C | -8.62283  | -0.79536 | -0.32371 |
| H | -7.73382  | 1.12177  | -0.11330 |
| H | -8.43529  | -1.86035 | -0.44977 |
| C | -10.04288 | -0.45107 | -0.26606 |

**Table S9. continued.**

|   |            |           |           |
|---|------------|-----------|-----------|
| C | 9. 47002   | -2. 67347 | -0. 04213 |
| N | 10. 83123  | -0. 73124 | -0. 47963 |
| C | 11. 91030  | -1. 51744 | -0. 40474 |
| C | 10. 60438  | -3. 47310 | 0. 03185  |
| C | 11. 86037  | -2. 88920 | -0. 15271 |
| H | 12. 86986  | -1. 02413 | -0. 55458 |
| H | 8. 48675   | -3. 11010 | 0. 09789  |
| H | 10. 51129  | -4. 53715 | 0. 23036  |
| H | 12. 77235  | -3. 47541 | -0. 10361 |
| C | -10. 52232 | 0. 86513  | -0. 10322 |
| N | -10. 89179 | -1. 50183 | -0. 38139 |
| C | -12. 20685 | -1. 26320 | -0. 33761 |
| C | -11. 89288 | 1. 09147  | -0. 06036 |
| C | -12. 76493 | 0. 00616  | -0. 17976 |
| H | -12. 85211 | -2. 13551 | -0. 43401 |
| H | -9. 83093  | 1. 69617  | -0. 01154 |
| H | -12. 27682 | 2. 10008  | 0. 06460  |
| H | -13. 84193 | 0. 13661  | -0. 15164 |
| C | -3. 20744  | -2. 04813 | 0. 89818  |
| H | -4. 02888  | -1. 79556 | -1. 08792 |
| H | -2. 35063  | -1. 34026 | -0. 96354 |
| H | 4. 76252   | 2. 47024  | -1. 30376 |
| H | 3. 05261   | 2. 79777  | -1. 14749 |
| C | 4. 20621   | 3. 23139  | 0. 64084  |
| H | 3. 36262   | 3. 15458  | 1. 34064  |
| H | 5. 07513   | 2. 81175  | 1. 16523  |
| C | 4. 46873   | 4. 70683  | 0. 31277  |
| H | -2. 47529  | -1. 54872 | 1. 54709  |
| H | -4. 17172  | -1. 99200 | 1. 42097  |
| C | -2. 80856  | -3. 51741 | 0. 71156  |
| H | 5. 31162   | 4. 77605  | -0. 38929 |
| H | 3. 59795   | 5. 12259  | -0. 21414 |
| C | 4. 76613   | 5. 55225  | 1. 55582  |
| H | 3. 92610   | 5. 52838  | 2. 26104  |
| H | 5. 65315   | 5. 18077  | 2. 08374  |



**Table S9. continued.**

|   |           |           |          |
|---|-----------|-----------|----------|
| H | 4. 94965  | 6. 59977  | 1. 29041 |
| H | -3. 54017 | -4. 01046 | 0. 05585 |
| H | -1. 84442 | -3. 56677 | 0. 18593 |
| C | -2. 70966 | -4. 28291 | 2. 03548 |
| H | -1. 96113 | -3. 83162 | 2. 69850 |
| H | -3. 66921 | -4. 27909 | 2. 56729 |
| H | -2. 42319 | -5. 32807 | 1. 87097 |

**Table S10. Cartesian coordinates of isomer C of 4ac by TD-DFT calculations**

Energy: -1145898.9577530

|   |          |          |          |
|---|----------|----------|----------|
| C | -1.27925 | -0.08216 | 0.00523  |
| C | -2.64181 | -0.55447 | -0.00862 |
| S | -0.00000 | -1.29009 | -0.00001 |
| C | -0.70545 | 1.18524  | -0.00073 |
| C | 1.27925  | -0.08216 | -0.00523 |
| C | 0.70545  | 1.18524  | 0.00073  |
| H | -1.28044 | 2.10094  | -0.03025 |
| C | 2.64181  | -0.55447 | 0.00862  |
| H | 1.28044  | 2.10094  | 0.03026  |
| C | -3.81648 | 0.11392  | 0.22649  |
| H | -2.73931 | -1.61711 | -0.22848 |
| C | -3.89425 | 1.57973  | 0.59422  |
| C | -5.04082 | -0.65397 | 0.10312  |
| C | 3.81648  | 0.11392  | -0.22649 |
| H | 2.73931  | -1.61711 | 0.22848  |
| C | 3.89425  | 1.57973  | -0.59422 |
| C | 5.04082  | -0.65397 | -0.10312 |
| C | 6.31595  | -0.20565 | -0.27142 |
| H | 4.91247  | -1.70436 | 0.16129  |
| H | 6.50394  | 0.83534  | -0.52711 |
| C | 7.47318  | -1.05004 | -0.12324 |
| C | -6.31595 | -0.20565 | 0.27141  |
| H | -4.91247 | -1.70436 | -0.16130 |
| H | -6.50394 | 0.83534  | 0.52711  |
| C | -7.47318 | -1.05004 | 0.12324  |
| C | -8.74778 | -0.61390 | 0.28510  |
| H | -7.28097 | -2.09119 | -0.13441 |
| H | -8.91930 | 0.43021  | 0.54134  |
| C | -9.97609 | -1.39666 | 0.15352  |
| C | 8.74778  | -0.61390 | -0.28509 |
| H | 7.28097  | -2.09120 | 0.13441  |
| H | 8.91930  | 0.43021  | -0.54133 |
| C | 9.97609  | -1.39666 | -0.15352 |

**Table S10. continued.**

|   |            |           |           |
|---|------------|-----------|-----------|
| C | -9. 99710  | -2. 76952 | -0. 16765 |
| N | -11. 12185 | -0. 70354 | 0. 36463  |
| C | -12. 28542 | -1. 35434 | 0. 26079  |
| C | -11. 21709 | -3. 42724 | -0. 27066 |
| C | -12. 39619 | -2. 70977 | -0. 05272 |
| H | -13. 18071 | -0. 75972 | 0. 43812  |
| H | -9. 07158  | -3. 31085 | -0. 33322 |
| H | -11. 24898 | -4. 48480 | -0. 51728 |
| H | -13. 37045 | -3. 18274 | -0. 12267 |
| C | 9. 99710   | -2. 76952 | 0. 16765  |
| N | 11. 12185  | -0. 70354 | -0. 36462 |
| C | 12. 28542  | -1. 35434 | -0. 26077 |
| C | 11. 21709  | -3. 42724 | 0. 27066  |
| C | 12. 39619  | -2. 70977 | 0. 05273  |
| H | 13. 18071  | -0. 75972 | -0. 43810 |
| H | 9. 07158   | -3. 31085 | 0. 33321  |
| H | 11. 24898  | -4. 48481 | 0. 51727  |
| H | 13. 37044  | -3. 18274 | 0. 12268  |
| C | 4. 08306   | 2. 51388  | 0. 62104  |
| H | 4. 72879   | 1. 73460  | -1. 28860 |
| H | 2. 99268   | 1. 87050  | -1. 14408 |
| H | -4. 72879  | 1. 73460  | 1. 28860  |
| H | -2. 99268  | 1. 87050  | 1. 14409  |
| C | -4. 08305  | 2. 51388  | -0. 62104 |
| H | -3. 25149  | 2. 37245  | -1. 32509 |
| H | -4. 99264  | 2. 22030  | -1. 16198 |
| C | -4. 17620  | 3. 99356  | -0. 22700 |
| H | 3. 25150   | 2. 37245  | 1. 32509  |
| H | 4. 99264   | 2. 22030  | 1. 16197  |
| C | 4. 17620   | 3. 99356  | 0. 22700  |
| H | -5. 00656  | 4. 12720  | 0. 48065  |
| H | -3. 26432  | 4. 28391  | 0. 31421  |
| C | -4. 37407  | 4. 92145  | -1. 43048 |
| H | -3. 54160  | 4. 83316  | -2. 13953 |
| H | -5. 29718  | 4. 67703  | -1. 97052 |

**Table S10. continued.**

|   |           |          |           |
|---|-----------|----------|-----------|
| H | -4. 43722 | 5. 97032 | -1. 11857 |
| H | 5. 00656  | 4. 12720 | -0. 48066 |
| H | 3. 26432  | 4. 28391 | -0. 31420 |
| C | 4. 37408  | 4. 92145 | 1. 43048  |
| H | 3. 54161  | 4. 83315 | 2. 13953  |
| H | 5. 29718  | 4. 67703 | 1. 97052  |
| H | 4. 43723  | 5. 97032 | 1. 11857  |

**Table S11. Cartesian coordinates of isomer A of 4cc by TD-DFT calculations**

Energy: -1528336.6082266

|   |          |          |          |
|---|----------|----------|----------|
| C | 1.27676  | -2.19734 | -0.03650 |
| C | 2.69442  | -1.96357 | -0.05879 |
| S | -0.00000 | -0.98314 | 0.00000  |
| C | 0.70219  | -3.46569 | -0.01649 |
| C | -1.27676 | -2.19734 | 0.03650  |
| C | -0.70219 | -3.46569 | 0.01650  |
| H | 1.30503  | -4.36790 | -0.02872 |
| C | -2.69442 | -1.96357 | 0.05879  |
| H | -1.30503 | -4.36790 | 0.02873  |
| C | 3.45161  | -0.82039 | -0.12848 |
| H | 3.25144  | -2.89971 | -0.01231 |
| C | 2.87333  | 0.57773  | -0.19277 |
| C | 4.89065  | -0.98804 | -0.10820 |
| C | -3.45162 | -0.82039 | 0.12848  |
| H | -3.25144 | -2.89971 | 0.01231  |
| C | -2.87333 | 0.57773  | 0.19277  |
| C | -4.89065 | -0.98804 | 0.10820  |
| C | -5.83837 | -0.00835 | 0.15015  |
| H | -5.24347 | -2.01848 | 0.04809  |
| H | -5.54221 | 1.03778  | 0.20415  |
| C | -7.25103 | -0.27186 | 0.12550  |
| C | 5.83837  | -0.00835 | -0.15015 |
| H | 5.24347  | -2.01848 | -0.04809 |
| H | 5.54221  | 1.03778  | -0.20415 |
| C | 7.25103  | -0.27186 | -0.12550 |
| C | 8.20308  | 0.69875  | -0.16712 |
| H | 7.55350  | -1.31841 | -0.07053 |
| H | 7.88166  | 1.73903  | -0.22123 |
| C | 9.63386  | 0.51971  | -0.14834 |
| C | -8.20308 | 0.69875  | 0.16712  |
| H | -7.55350 | -1.31841 | 0.07052  |
| H | -7.88166 | 1.73903  | 0.22123  |
| C | -9.63386 | 0.51971  | 0.14834  |

**Table S11. continued.**

|   |            |           |           |
|---|------------|-----------|-----------|
| C | -2. 71203  | 1. 23960  | -1. 19313 |
| H | -3. 51971  | 1. 20933  | 0. 81407  |
| H | -1. 90390  | 0. 56514  | 0. 70253  |
| H | 3. 51971   | 1. 20933  | -0. 81407 |
| H | 1. 90390   | 0. 56514  | -0. 70252 |
| C | 2. 71204   | 1. 23960  | 1. 19313  |
| H | 2. 04736   | 0. 62342  | 1. 81364  |
| H | 3. 68549   | 1. 25140  | 1. 70161  |
| C | 2. 15865   | 2. 66775  | 1. 11149  |
| H | -2. 04736  | 0. 62341  | -1. 81363 |
| H | -3. 68549  | 1. 25140  | -1. 70161 |
| C | -2. 15865  | 2. 66775  | -1. 11149 |
| H | 2. 82225   | 3. 27786  | 0. 48244  |
| H | 1. 18476   | 2. 65032  | 0. 60132  |
| C | 2. 00422   | 3. 32882  | 2. 48537  |
| H | 1. 31913   | 2. 75797  | 3. 12436  |
| H | 2. 96850   | 3. 39055  | 3. 00493  |
| H | 1. 60733   | 4. 34662  | 2. 39570  |
| H | -2. 82225  | 3. 27786  | -0. 48244 |
| H | -1. 18476  | 2. 65032  | -0. 60132 |
| C | -2. 00421  | 3. 32882  | -2. 48537 |
| H | -1. 31912  | 2. 75796  | -3. 12436 |
| H | -2. 96849  | 3. 39055  | -3. 00493 |
| H | -1. 60732  | 4. 34662  | -2. 39570 |
| C | 10. 59080  | 1. 51776  | -0. 19041 |
| S | 10. 41852  | -1. 05550 | -0. 06701 |
| C | 11. 99884  | -0. 33171 | -0. 09145 |
| C | 11. 92923  | 1. 03422  | -0. 15803 |
| H | 12. 87839  | -0. 96057 | -0. 05513 |
| H | 10. 32814  | 2. 56936  | -0. 24301 |
| H | 12. 80390  | 1. 67506  | -0. 18318 |
| C | -10. 59080 | 1. 51776  | 0. 19040  |
| S | -10. 41853 | -1. 05549 | 0. 06701  |
| C | -11. 99884 | -0. 33171 | 0. 09145  |
| C | -11. 92923 | 1. 03422  | 0. 15803  |

**Table S11. continued.**

|   |           |          |         |
|---|-----------|----------|---------|
| H | -12.87839 | -0.96057 | 0.05512 |
| H | -10.32814 | 2.56936  | 0.24301 |
| H | -12.80390 | 1.67506  | 0.18317 |

**Table S12. Cartesian coordinates of isomer B of 4cc by TD-DFT calculations**

Energy: -1528335.8603734

|   |          |          |          |
|---|----------|----------|----------|
| C | 1.12953  | 1.00968  | -0.11282 |
| C | 2.43651  | 0.40387  | -0.12004 |
| S | -0.26056 | -0.07537 | -0.18972 |
| C | 0.68105  | 2.32431  | -0.03233 |
| C | -1.41684 | 1.24747  | -0.13052 |
| C | -0.72130 | 2.45033  | -0.04199 |
| H | 1.34045  | 3.17568  | 0.06910  |
| C | -2.85143 | 1.15574  | -0.14314 |
| H | -1.23529 | 3.40405  | 0.02340  |
| C | 3.67417  | 0.96356  | -0.32024 |
| H | 2.42689  | -0.67293 | 0.04680  |
| C | 3.89338  | 2.43110  | -0.61796 |
| C | 4.81765  | 0.07777  | -0.23221 |
| C | -3.71533 | 0.09776  | -0.27656 |
| H | -3.31382 | 2.13607  | -0.02538 |
| C | -3.27302 | -1.34005 | -0.44961 |
| C | -5.13163 | 0.39942  | -0.21931 |
| C | -6.16990 | -0.47938 | -0.31310 |
| H | -5.38266 | 1.45186  | -0.08052 |
| H | -5.97738 | -1.54258 | -0.44623 |
| C | -7.54986 | -0.08270 | -0.24425 |
| C | 6.13172  | 0.40946  | -0.38056 |
| H | 4.58868  | -0.96665 | -0.01621 |
| H | 6.41593  | 1.43964  | -0.58821 |
| C | 7.20511  | -0.54072 | -0.27395 |
| C | 8.51830  | -0.21780 | -0.41901 |
| H | 6.92608  | -1.57400 | -0.06369 |
| H | 8.77720  | 0.82010  | -0.62900 |
| C | 9.65094  | -1.10567 | -0.32688 |
| C | -8.59362 | -0.94964 | -0.33833 |
| H | -7.74714 | 0.98153  | -0.10852 |
| H | -8.37771 | -2.00948 | -0.47444 |
| C | -9.99928 | -0.63238 | -0.27931 |



**Table S12. continued.**

|   |            |           |           |
|---|------------|-----------|-----------|
| C | -3. 15778  | -2. 11353 | 0. 88195  |
| H | -3. 98328  | -1. 86194 | -1. 10230 |
| H | -2. 31245  | -1. 38052 | -0. 97492 |
| H | 4. 73851   | 2. 53791  | -1. 30878 |
| H | 3. 02319   | 2. 83362  | -1. 14774 |
| C | 4. 17269   | 3. 28426  | 0. 63857  |
| H | 3. 33292   | 3. 18928  | 1. 34074  |
| H | 5. 05120   | 2. 88032  | 1. 15935  |
| C | 4. 40525   | 4. 76545  | 0. 31383  |
| H | -2. 43274  | -1. 60716 | 1. 53347  |
| H | -4. 12248  | -2. 07490 | 1. 40558  |
| C | -2. 73712  | -3. 57558 | 0. 68660  |
| H | 5. 24436   | 4. 85316  | -0. 39074 |
| H | 3. 52483   | 5. 16547  | -0. 20927 |
| C | 4. 68991   | 5. 61346  | 1. 55813  |
| H | 3. 85271   | 5. 57127  | 2. 26587  |
| H | 5. 58565   | 5. 25809  | 2. 08244  |
| H | 4. 85203   | 6. 66509  | 1. 29501  |
| H | -3. 46150  | -4. 07560 | 0. 02807  |
| H | -1. 77254  | -3. 60754 | 0. 16042  |
| C | -2. 62637  | -4. 34755 | 2. 00584  |
| H | -1. 88439  | -3. 88915 | 2. 67134  |
| H | -3. 58566  | -4. 36109 | 2. 53800  |
| H | -2. 32448  | -5. 38737 | 1. 83509  |
| C | -11. 05186 | -1. 52427 | -0. 37988 |
| S | -10. 62116 | 1. 00146  | -0. 06161 |
| C | -12. 26629 | 0. 44209  | -0. 11200 |
| C | -12. 33467 | -0. 91448 | -0. 28512 |
| H | -13. 07776 | 1. 15039  | -0. 01062 |
| H | -10. 89684 | -2. 58932 | -0. 51850 |
| H | -13. 26939 | -1. 46157 | -0. 34317 |
| C | 10. 98256  | -0. 76281 | -0. 47792 |
| S | 9. 51302   | -2. 83019 | 0. 00487  |
| C | 11. 23706  | -3. 03881 | -0. 06866 |
| C | 11. 87944  | -1. 85837 | -0. 33143 |

**Table S12. continued.**

|   |           |           |           |
|---|-----------|-----------|-----------|
| H | 11. 66665 | -4. 01950 | 0. 08673  |
| H | 11. 29830 | 0. 25384  | -0. 68857 |
| H | 12. 95718 | -1. 77266 | -0. 41777 |

**Table S13. Cartesian coordinates of isomer C of 4cc by TD-DFT calculations**

Energy: -1528334.3297083

|   |          |          |          |
|---|----------|----------|----------|
| C | -1.28068 | 0.01248  | 0.00769  |
| C | -2.64238 | -0.46132 | -0.00209 |
| S | 0.00000  | -1.19559 | -0.00001 |
| C | -0.70564 | 1.27938  | 0.00045  |
| C | 1.28068  | 0.01248  | -0.00770 |
| C | 0.70564  | 1.27938  | -0.00046 |
| H | -1.28017 | 2.19548  | -0.02787 |
| C | 2.64238  | -0.46132 | 0.00208  |
| H | 1.28017  | 2.19548  | 0.02786  |
| C | -3.81879 | 0.20580  | 0.23174  |
| H | -2.73878 | -1.52514 | -0.21715 |
| C | -3.89559 | 1.67380  | 0.59195  |
| C | -5.04276 | -0.56213 | 0.11550  |
| C | 3.81879  | 0.20580  | -0.23175 |
| H | 2.73878  | -1.52514 | 0.21713  |
| C | 3.89559  | 1.67380  | -0.59196 |
| C | 5.04276  | -0.56213 | -0.11550 |
| C | 6.31857  | -0.11322 | -0.28579 |
| H | 4.91522  | -1.61389 | 0.14416  |
| H | 6.50290  | 0.92989  | -0.53686 |
| C | 7.47787  | -0.95235 | -0.14842 |
| C | -6.31857 | -0.11322 | 0.28579  |
| H | -4.91522 | -1.61389 | -0.14417 |
| H | -6.50290 | 0.92989  | 0.53686  |
| C | -7.47786 | -0.95235 | 0.14842  |
| C | -8.75417 | -0.51320 | 0.31476  |
| H | -7.29873 | -1.99817 | -0.10435 |
| H | -8.91399 | 0.53538  | 0.56639  |
| C | -9.96563 | -1.28672 | 0.19646  |
| C | 8.75417  | -0.51320 | -0.31476 |
| H | 7.29873  | -1.99817 | 0.10434  |
| H | 8.91399  | 0.53538  | -0.56638 |
| C | 9.96563  | -1.28672 | -0.19645 |

**Table S13. continued.**

|   |            |           |           |
|---|------------|-----------|-----------|
| C | 4. 08230   | 2. 60172  | 0. 62823  |
| H | 4. 73044   | 1. 83360  | -1. 28489 |
| H | 2. 99404   | 1. 96668  | -1. 14086 |
| H | -4. 73043  | 1. 83360  | 1. 28489  |
| H | -2. 99404  | 1. 96668  | 1. 14085  |
| C | -4. 08230  | 2. 60172  | -0. 62823 |
| H | -3. 25038  | 2. 45538  | -1. 33086 |
| H | -4. 99189  | 2. 30614  | -1. 16814 |
| C | -4. 17388  | 4. 08376  | -0. 24279 |
| H | 3. 25038   | 2. 45537  | 1. 33086  |
| H | 4. 99189   | 2. 30614  | 1. 16815  |
| C | 4. 17388   | 4. 08376  | 0. 24279  |
| H | -5. 00461  | 4. 22259  | 0. 46349  |
| H | -3. 26209  | 4. 37604  | 0. 29757  |
| C | -4. 36953  | 5. 00523  | -1. 45157 |
| H | -3. 53655  | 4. 91186  | -2. 15939 |
| H | -5. 29244  | 4. 75895  | -1. 99112 |
| H | -4. 43161  | 6. 05597  | -1. 14571 |
| H | 5. 00461   | 4. 22259  | -0. 46349 |
| H | 3. 26209   | 4. 37604  | -0. 29757 |
| C | 4. 36952   | 5. 00523  | 1. 45157  |
| H | 3. 53654   | 4. 91186  | 2. 15939  |
| H | 5. 29243   | 4. 75894  | 1. 99113  |
| H | 4. 43160   | 6. 05597  | 1. 14572  |
| C | 11. 25856  | -0. 82576 | -0. 36740 |
| S | 9. 99172   | -3. 00332 | 0. 19808  |
| C | 11. 72765  | -3. 05119 | 0. 12245  |
| C | 12. 25519  | -1. 82589 | -0. 18642 |
| H | 12. 24811  | -3. 98075 | 0. 31085  |
| H | 11. 47624  | 0. 20775  | -0. 61656 |
| H | 13. 31985  | -1. 64219 | -0. 28187 |
| C | -11. 25856 | -0. 82576 | 0. 36742  |
| S | -9. 99172  | -3. 00332 | -0. 19808 |
| C | -11. 72765 | -3. 05119 | -0. 12245 |
| C | -12. 25519 | -1. 82589 | 0. 18644  |

**Table S13. continued.**

|   |           |          |          |
|---|-----------|----------|----------|
| H | -12.24811 | -3.98075 | -0.31085 |
| H | -11.47624 | 0.20775  | 0.61658  |
| H | -13.31985 | -1.64219 | 0.28189  |

**Table S14. Cartesian coordinates of 4ee by TD-DFT calculations**

Energy: -949157.0798626

|   |           |          |          |
|---|-----------|----------|----------|
| C | -1.30502  | -0.36690 | -0.34699 |
| C | -2.73743  | -0.65181 | -0.34384 |
| C | -0.71315  | 0.91663  | -0.37250 |
| C | -0.41954  | -1.46906 | -0.37889 |
| C | 0.95986   | -1.31445 | -0.37363 |
| C | 0.66625   | 1.07124  | -0.37786 |
| C | 1.55173   | -0.03094 | -0.34708 |
| H | -0.83549  | -2.47338 | -0.40866 |
| H | 1.57787   | -2.20163 | -0.43144 |
| H | -1.33116  | 1.80387  | -0.42939 |
| C | 2.98414   | 0.25395  | -0.34388 |
| C | -3.81751  | 0.08793  | 0.05371  |
| H | -2.96590  | -1.66189 | -0.68561 |
| C | -3.73797  | 1.48018  | 0.64717  |
| C | -5.12500  | -0.53613 | -0.08693 |
| C | 4.06424   | -0.48601 | 0.05317  |
| H | 3.21261   | 1.26423  | -0.68505 |
| C | 3.98474   | -1.87850 | 0.64604  |
| C | 5.37172   | 0.13813  | -0.08712 |
| C | 6.57919   | -0.38636 | 0.25628  |
| H | 5.36808   | 1.13939  | -0.52011 |
| H | 6.64128   | -1.38407 | 0.68742  |
| C | 7.82696   | 0.31470  | 0.08103  |
| C | -6.33247  | -0.01179 | 0.25670  |
| H | -5.12138  | -1.53716 | -0.52046 |
| H | -6.39453  | 0.98569  | 0.68839  |
| C | -7.58025  | -0.71270 | 0.08096  |
| C | -8.78796  | -0.19513 | 0.41891  |
| H | -7.51588  | -1.71145 | -0.35000 |
| H | -8.80516  | 0.80880  | 0.84442  |
| C | -10.09922 | -0.82811 | 0.28064  |
| C | 9.03465   | -0.20302 | 0.41881  |
| H | 7.76260   | 1.31369  | -0.34938 |

**Table S14. continued.**

|   |            |           |           |
|---|------------|-----------|-----------|
| H | 9. 05185   | -1. 20719 | 0. 84374  |
| C | 10. 34590  | 0. 43011  | 0. 28107  |
| C | -10. 28610 | -2. 12888 | -0. 23520 |
| C | -11. 24498 | -0. 11052 | 0. 68182  |
| C | -12. 52079 | -0. 66249 | 0. 57361  |
| C | -11. 56021 | -2. 67952 | -0. 34286 |
| C | -12. 68591 | -1. 95123 | 0. 06023  |
| H | -11. 12467 | 0. 89330  | 1. 08265  |
| H | -13. 38584 | -0. 08602 | 0. 89055  |
| H | -9. 42897  | -2. 71489 | -0. 55360 |
| H | -11. 67790 | -3. 68315 | -0. 74302 |
| H | -13. 67818 | -2. 38518 | -0. 02549 |
| C | 10. 53277  | 1. 73121  | -0. 23393 |
| C | 11. 49165  | -0. 28769 | 0. 68193  |
| C | 12. 76745  | 0. 26441  | 0. 57421  |
| C | 11. 80688  | 2. 28197  | -0. 34111 |
| C | 12. 93256  | 1. 55348  | 0. 06166  |
| H | 11. 37134  | -1. 29176 | 1. 08211  |
| H | 13. 63248  | -0. 31222 | 0. 89088  |
| H | 9. 67566   | 2. 31738  | -0. 55205 |
| H | 11. 92456  | 3. 28586  | -0. 74061 |
| H | 13. 92482  | 1. 98753  | -0. 02367 |
| H | 3. 00198   | -2. 03337 | 1. 10278  |
| C | 4. 26635   | -3. 01091 | -0. 36518 |
| H | 4. 71028   | -1. 95638 | 1. 46588  |
| H | -2. 75533  | 1. 63470  | 1. 10420  |
| C | -4. 01915  | 2. 61286  | -0. 36416 |
| H | -4. 46368  | 1. 55793  | 1. 46682  |
| H | 1. 08220   | 2. 07559  | -0. 40680 |
| H | 3. 54496   | -2. 95347 | -1. 19228 |
| H | 5. 25503   | -2. 85623 | -0. 81706 |
| C | 4. 20621   | -4. 40564 | 0. 27091  |
| H | 4. 92913   | -4. 45694 | 1. 09737  |
| H | 3. 21523   | -4. 55630 | 0. 72237  |
| C | 4. 48986   | -5. 53241 | -0. 72833 |

**Table S14. continued.**

|   |           |           |           |
|---|-----------|-----------|-----------|
| H | 3. 76154  | -5. 52659 | -1. 54877 |
| H | 5. 48830  | -5. 42685 | -1. 17057 |
| H | 4. 44072  | -6. 51515 | -0. 24533 |
| H | -3. 29822 | 2. 55355  | -1. 19140 |
| H | -5. 00809 | 2. 45799  | -0. 81518 |
| C | -3. 95720 | 4. 00739  | 0. 27181  |
| H | -4. 67960 | 4. 06122  | 1. 09988  |
| H | -2. 96498 | 4. 15921  | 0. 72258  |
| C | -4. 24035 | 5. 14227  | -0. 72150 |
| H | -3. 51880 | 5. 08709  | -1. 54900 |
| H | -5. 23217 | 4. 99041  | -1. 17052 |
| C | -4. 17717 | 6. 53312  | -0. 08092 |
| H | -4. 91158 | 6. 62958  | 0. 72851  |
| H | -3. 18560 | 6. 72698  | 0. 34690  |
| H | -4. 38386 | 7. 32092  | -0. 81463 |
